# Supplementary material for: Cap analogs with a hydrophobic photocleavable tag enable facile purification of fully capped mRNA with various cap structures
Source: Research Square preprint supplement (doi:10.21203/rs.3.rs-2119525/v1), 2024-11-05
Supplement: Supplementary file 1 [file SourceData 2 Supplementary Information.xlsx]

## Sheet: Fig 16b
Time (min)	DiPure, crude		Time (min)	DiPure, after HPLC purifiation		Time (min)	DiPure, after photo-irradiation
0	0		0	0		0	0
0.00333	-3e-06		0.00333	-7.5e-06		0.00333	-5e-06
0.00667	-3.5e-06		0.00667	-1.1e-05		0.00667	7.5e-06
0.01	1.7e-05		0.01	-5.5e-06		0.01	1.25e-05
0.01333	3.7e-05		0.01333	-4.5e-06		0.01333	1.45e-05
0.01667	3.5e-05		0.01667	-4e-06		0.01667	1e-05
0.02	3.45e-05		0.02	0		0.02	8.5e-06
0.02333	4.1e-05		0.02333	4e-06		0.02333	1.5e-05
0.02667	2.95e-05		0.02667	-4e-06		0.02667	2.65e-05
0.03	2.6e-05		0.03	-6e-06		0.03	2.3e-05
0.03333	3.85e-05		0.03333	5.5e-06		0.03333	1.45e-05
0.03667	4.2e-05		0.03667	4e-06		0.03667	1.35e-05
0.04	4.3e-05		0.04	2e-06		0.04	2.05e-05
0.04333	3.9e-05		0.04333	1e-06		0.04333	2.15e-05
0.04667	4.35e-05		0.04667	2.5e-06		0.04667	1.9e-05
0.05	5.1e-05		0.05	5e-06		0.05	2.75e-05
0.05333	3.95e-05		0.05333	9.5e-06		0.05333	3e-05
0.05667	4.1e-05		0.05667	1e-05		0.05667	2.3e-05
0.06	4.75e-05		0.06	2e-06		0.06	1.75e-05
0.06333	4.25e-05		0.06333	1e-05		0.06333	1.95e-05
0.06667	3.7e-05		0.06667	1.6e-05		0.06667	3.15e-05
0.07	3.25e-05		0.07	4e-06		0.07	2.55e-05
0.07333	3.05e-05		0.07333	2.5e-06		0.07333	1.35e-05
0.07667	2.6e-05		0.07667	1.3e-05		0.07667	2.65e-05
0.08	2.35e-05		0.08	1.55e-05		0.08	2.6e-05
0.08333	3.05e-05		0.08333	2.4e-05		0.08333	2.25e-05
0.08667	3.2e-05		0.08667	2.1e-05		0.08667	3.8e-05
0.09	2.85e-05		0.09	1.7e-05		0.09	3.65e-05
0.09333	3.2e-05		0.09333	1.55e-05		0.09333	3e-05
0.09667	3.9e-05		0.09667	1.05e-05		0.09667	3.65e-05
0.1	4.7e-05		0.1	2.05e-05		0.1	3.55e-05
0.10333	4.85e-05		0.10333	2.85e-05		0.10333	2.25e-05
0.10667	4.4e-05		0.10667	3.15e-05		0.10667	8e-06
0.11	4.7e-05		0.11	2.6e-05		0.11	1.35e-05
0.11333	4.9e-05		0.11333	2.15e-05		0.11333	2e-05
0.11667	4.65e-05		0.11667	1.55e-05		0.11667	2.05e-05
0.12	4.95e-05		0.12	6.5e-06		0.12	2.5e-05
0.12333	5.3e-05		0.12333	1.4e-05		0.12333	3.15e-05
0.12667	5.45e-05		0.12667	1.8e-05		0.12667	3.1e-05
0.13	4.9e-05		0.13	2.15e-05		0.13	2.1e-05
0.13333	4.15e-05		0.13333	2.15e-05		0.13333	2.25e-05
0.13667	4.25e-05		0.13667	1.05e-05		0.13667	2.7e-05
0.14	4.05e-05		0.14	1.05e-05		0.14	2.75e-05
0.14333	4.25e-05		0.14333	1.6e-05		0.14333	2.4e-05
0.14667	5.85e-05		0.14667	2.3e-05		0.14667	2.3e-05
0.15	5.75e-05		0.15	2.7e-05		0.15	2.2e-05
0.15333	4.75e-05		0.15333	1.8e-05		0.15333	2.35e-05
0.15667	5.7e-05		0.15667	1.8e-05		0.15667	2.45e-05
0.16	5.8e-05		0.16	2.5e-05		0.16	2.3e-05
0.16333	5.45e-05		0.16333	1.75e-05		0.16333	3.15e-05
0.16667	4.9e-05		0.16667	1.3e-05		0.16667	4.2e-05
0.17	4.05e-05		0.17	1.45e-05		0.17	3.35e-05
0.17333	3.95e-05		0.17333	1.95e-05		0.17333	2.1e-05
0.17667	2.95e-05		0.17667	2e-05		0.17667	2.45e-05
0.18	3.65e-05		0.18	1.75e-05		0.18	3.15e-05
0.18333	4.75e-05		0.18333	1.35e-05		0.18333	3.2e-05
0.18667	4.2e-05		0.18667	1.9e-05		0.18667	2.6e-05
0.19	4.2e-05		0.19	2.4e-05		0.19	2.7e-05
0.19333	3.65e-05		0.19333	2.1e-05		0.19333	3.45e-05
0.19667	4.1e-05		0.19667	2.15e-05		0.19667	3.2e-05
0.2	5.3e-05		0.2	1.95e-05		0.2	3.2e-05
0.20333	4.4e-05		0.20333	1.5e-05		0.20333	3.05e-05
0.20667	4.45e-05		0.20667	1.95e-05		0.20667	3.35e-05
0.21	5.15e-05		0.21	3.15e-05		0.21	3.1e-05
0.21333	4.9e-05		0.21333	3.45e-05		0.21333	2.4e-05
0.21667	5.05e-05		0.21667	3.55e-05		0.21667	2.5e-05
0.22	5.55e-05		0.22	3.8e-05		0.22	2.8e-05
0.22333	5.5e-05		0.22333	3.75e-05		0.22333	2.7e-05
0.22667	5.6e-05		0.22667	3.6e-05		0.22667	2.1e-05
0.23	5.2e-05		0.23	3.5e-05		0.23	2.75e-05
0.23333	5.05e-05		0.23333	3.45e-05		0.23333	2.85e-05
0.23667	5.7e-05		0.23667	4.05e-05		0.23667	1.75e-05
0.24	5.05e-05		0.24	4.65e-05		0.24	1.8e-05
0.24333	4.8e-05		0.24333	4.35e-05		0.24333	2.8e-05
0.24667	5.1e-05		0.24667	3.7e-05		0.24667	2.85e-05
0.25	5.1e-05		0.25	3.55e-05		0.25	2e-05
0.25333	5.3e-05		0.25333	4.05e-05		0.25333	1.75e-05
0.25667	5.3e-05		0.25667	4.55e-05		0.25667	1.75e-05
0.26	5.25e-05		0.26	4.45e-05		0.26	2.75e-05
0.26333	4.1e-05		0.26333	4.3e-05		0.26333	4.05e-05
0.26667	3.3e-05		0.26667	4.1e-05		0.26667	3.4e-05
0.27	3.3e-05		0.27	4.35e-05		0.27	2.7e-05
0.27333	4.1e-05		0.27333	5.2e-05		0.27333	3.65e-05
0.27667	5.45e-05		0.27667	5.75e-05		0.27667	4.2e-05
0.28	6.45e-05		0.28	5.95e-05		0.28	3.75e-05
0.28333	7.8e-05		0.28333	6.75e-05		0.28333	2.8e-05
0.28667	7.35e-05		0.28667	6.8e-05		0.28667	2.15e-05
0.29	6.65e-05		0.29	5.55e-05		0.29	1.8e-05
0.29333	5.7e-05		0.29333	5.55e-05		0.29333	2.1e-05
0.29667	3.85e-05		0.29667	6.8e-05		0.29667	3.15e-05
0.3	3.85e-05		0.3	6.75e-05		0.3	3.5e-05
0.30333	4.95e-05		0.30333	6.8e-05		0.30333	4e-05
0.30667	5.4e-05		0.30667	7.05e-05		0.30667	3.4e-05
0.31	5.2e-05		0.31	6.65e-05		0.31	1.85e-05
0.31333	5.2e-05		0.31333	6.9e-05		0.31333	2.25e-05
0.31667	5.85e-05		0.31667	7.8e-05		0.31667	2.9e-05
0.32	6.25e-05		0.32	7.65e-05		0.32	3.05e-05
0.32333	6.95e-05		0.32333	6.8e-05		0.32333	3.75e-05
0.32667	7e-05		0.32667	6.7e-05		0.32667	3.95e-05
0.33	6.25e-05		0.33	6.85e-05		0.33	2.85e-05
0.33333	5.8e-05		0.33333	7.65e-05		0.33333	1.8e-05
0.33667	5.75e-05		0.33667	8.2e-05		0.33667	1.7e-05
0.34	6.3e-05		0.34	6.7e-05		0.34	1.95e-05
0.34333	5.95e-05		0.34333	6.3e-05		0.34333	2.2e-05
0.34667	6e-05		0.34667	6.95e-05		0.34667	1.45e-05
0.35	7.1e-05		0.35	6.75e-05		0.35	1.8e-05
0.35333	6.55e-05		0.35333	6.65e-05		0.35333	2.25e-05
0.35667	5.65e-05		0.35667	6e-05		0.35667	2.4e-05
0.36	5.85e-05		0.36	6.05e-05		0.36	2.65e-05
0.36333	5.3e-05		0.36333	6.55e-05		0.36333	1.95e-05
0.36667	4.45e-05		0.36667	6.25e-05		0.36667	2.55e-05
0.37	4.6e-05		0.37	6.75e-05		0.37	3.25e-05
0.37333	5.7e-05		0.37333	7.4e-05		0.37333	3.85e-05
0.37667	5.5e-05		0.37667	7.1e-05		0.37667	4.2e-05
0.38	4.6e-05		0.38	7.15e-05		0.38	3.6e-05
0.38333	4.85e-05		0.38333	5.85e-05		0.38333	2.95e-05
0.38667	5.65e-05		0.38667	4.95e-05		0.38667	2.05e-05
0.39	4.45e-05		0.39	5.8e-05		0.39	2e-05
0.39333	3.05e-05		0.39333	6.25e-05		0.39333	2.6e-05
0.39667	3.95e-05		0.39667	6.45e-05		0.39667	1.9e-05
0.4	5.05e-05		0.4	6.1e-05		0.4	1.85e-05
0.40333	5.35e-05		0.40333	5.95e-05		0.40333	2.85e-05
0.40667	5.1e-05		0.40667	5.5e-05		0.40667	3e-05
0.41	5.45e-05		0.41	5e-05		0.41	2.65e-05
0.41333	4.8e-05		0.41333	5.45e-05		0.41333	2.95e-05
0.41667	4.45e-05		0.41667	5e-05		0.41667	3.05e-05
0.42	5.65e-05		0.42	5.15e-05		0.42	2.7e-05
0.42333	5.3e-05		0.42333	6.95e-05		0.42333	1.7e-05
0.42667	5.5e-05		0.42667	7.75e-05		0.42667	9e-06
0.43	5.4e-05		0.43	7.65e-05		0.43	1.85e-05
0.43333	3.85e-05		0.43333	7.65e-05		0.43333	3.15e-05
0.43667	4e-05		0.43667	7e-05		0.43667	3.3e-05
0.44	4.45e-05		0.44	5.75e-05		0.44	2.4e-05
0.44333	5.5e-05		0.44333	6.1e-05		0.44333	1.85e-05
0.44667	5.7e-05		0.44667	7.35e-05		0.44667	2.7e-05
0.45	5.3e-05		0.45	7e-05		0.45	3e-05
0.45333	4.9e-05		0.45333	6.6e-05		0.45333	3e-05
0.45667	4.15e-05		0.45667	6.95e-05		0.45667	3.5e-05
0.46	4.75e-05		0.46	6.5e-05		0.46	4.3e-05
0.46333	4.7e-05		0.46333	6.6e-05		0.46333	3.45e-05
0.46667	3.5e-05		0.46667	6.9e-05		0.46667	2.5e-05
0.47	2.9e-05		0.47	7.3e-05		0.47	2.7e-05
0.47333	3.65e-05		0.47333	7.85e-05		0.47333	1.95e-05
0.47667	4.5e-05		0.47667	8.25e-05		0.47667	9.5e-06
0.48	4.45e-05		0.48	6.95e-05		0.48	3.5e-06
0.48333	4.7e-05		0.48333	5.55e-05		0.48333	7e-06
0.48667	5.15e-05		0.48667	6.65e-05		0.48667	8.5e-06
0.49	4.45e-05		0.49	7.25e-05		0.49	1.1e-05
0.49333	3.75e-05		0.49333	7.4e-05		0.49333	1.95e-05
0.49667	4.35e-05		0.49667	7.45e-05		0.49667	2.8e-05
0.5	5.25e-05		0.5	7.05e-05		0.5	3.2e-05
0.50333	5.4e-05		0.50333	7.55e-05		0.50333	2.5e-05
0.50667	6e-05		0.50667	7.3e-05		0.50667	1.45e-05
0.51	5.3e-05		0.51	6.95e-05		0.51	1.85e-05
0.51333	3.9e-05		0.51333	7.6e-05		0.51333	2e-05
0.51667	5.2e-05		0.51667	7.55e-05		0.51667	8e-06
0.52	6.2e-05		0.52	7.65e-05		0.52	1.9e-05
0.52333	5.15e-05		0.52333	7.8e-05		0.52333	3.25e-05
0.52667	4.85e-05		0.52667	8.3e-05		0.52667	2.7e-05
0.53	4.65e-05		0.53	8.4e-05		0.53	2.2e-05
0.53333	4.9e-05		0.53333	8.05e-05		0.53333	1.95e-05
0.53667	5.4e-05		0.53667	7.65e-05		0.53667	1.85e-05
0.54	4.95e-05		0.54	7.85e-05		0.54	1.35e-05
0.54333	5.15e-05		0.54333	8.5e-05		0.54333	1.45e-05
0.54667	6.35e-05		0.54667	8.05e-05		0.54667	2.1e-05
0.55	6.75e-05		0.55	7.4e-05		0.55	2.15e-05
0.55333	5.95e-05		0.55333	8.1e-05		0.55333	3e-05
0.55667	6.15e-05		0.55667	8.2e-05		0.55667	3.8e-05
0.56	5.9e-05		0.56	6.95e-05		0.56	3.45e-05
0.56333	5.25e-05		0.56333	7.85e-05		0.56333	2.9e-05
0.56667	5.6e-05		0.56667	8.5e-05		0.56667	2.65e-05
0.57	5.75e-05		0.57	7.65e-05		0.57	2.55e-05
0.57333	5.25e-05		0.57333	7.25e-05		0.57333	2e-05
0.57667	4.9e-05		0.57667	7.7e-05		0.57667	1.9e-05
0.58	3.7e-05		0.58	8e-05		0.58	2.4e-05
0.58333	3.35e-05		0.58333	7.95e-05		0.58333	2e-05
0.58667	4.3e-05		0.58667	8.4e-05		0.58667	2.75e-05
0.59	3.95e-05		0.59	8.75e-05		0.59	2.9e-05
0.59333	4.1e-05		0.59333	9.6e-05		0.59333	1.4e-05
0.59667	4.4e-05		0.59667	0.000102		0.59667	2e-05
0.6	4.15e-05		0.6	9.7e-05		0.6	3.1e-05
0.60333	4.35e-05		0.60333	9.3e-05		0.60333	3.4e-05
0.60667	4.75e-05		0.60667	9.15e-05		0.60667	2.95e-05
0.61	5.15e-05		0.61	8.95e-05		0.61	2.65e-05
0.61333	5.3e-05		0.61333	9.65e-05		0.61333	2.5e-05
0.61667	5e-05		0.61667	9.55e-05		0.61667	2e-05
0.62	4.35e-05		0.62	8.25e-05		0.62	2.3e-05
0.62333	3.85e-05		0.62333	8.65e-05		0.62333	1.75e-05
0.62667	3.15e-05		0.62667	9.5e-05		0.62667	-1.5e-06
0.63	3.85e-05		0.63	9.3e-05		0.63	2e-06
0.63333	4.45e-05		0.63333	9.45e-05		0.63333	9.5e-06
0.63667	3.6e-05		0.63667	9.6e-05		0.63667	0
0.64	4.25e-05		0.64	9.15e-05		0.64	-3e-06
0.64333	4.6e-05		0.64333	0.0001135		0.64333	7e-06
0.64667	3.85e-05		0.64667	0.000131		0.64667	1.1e-05
0.65	4.05e-05		0.65	0.0001075		0.65	7.5e-06
0.65333	4.75e-05		0.65333	9.25e-05		0.65333	1.75e-05
0.65667	5.5e-05		0.65667	9.25e-05		0.65667	3.15e-05
0.66	4.95e-05		0.66	9.2e-05		0.66	2.3e-05
0.66333	3.85e-05		0.66333	8.95e-05		0.66333	1.05e-05
0.66667	3.4e-05		0.66667	8.65e-05		0.66667	1.65e-05
0.67	3.6e-05		0.67	0.0001015		0.67	1.65e-05
0.67333	3.5e-05		0.67333	0.000113		0.67333	1.35e-05
0.67667	3.95e-05		0.67667	0.000101		0.67667	2.05e-05
0.68	4.3e-05		0.68	8.95e-05		0.68	1.75e-05
0.68333	2.75e-05		0.68333	9.55e-05		0.68333	1.25e-05
0.68667	2.85e-05		0.68667	0.000113		0.68667	1.65e-05
0.69	4.45e-05		0.69	0.000116		0.69	1.8e-05
0.69333	4.55e-05		0.69333	0.000119		0.69333	2e-05
0.69667	5.15e-05		0.69667	0.000118		0.69667	2.2e-05
0.7	5.3e-05		0.7	0.0001045		0.7	2.3e-05
0.70333	3.8e-05		0.70333	9.95e-05		0.70333	2.4e-05
0.70667	4.4e-05		0.70667	0.0001045		0.70667	2.8e-05
0.71	5.45e-05		0.71	0.000115		0.71	1.9e-05
0.71333	4.85e-05		0.71333	0.0001075		0.71333	8.5e-06
0.71667	4.65e-05		0.71667	0.0001		0.71667	1.65e-05
0.72	3.95e-05		0.72	0.0001095		0.72	2.55e-05
0.72333	3e-05		0.72333	0.000125		0.72333	2.6e-05
0.72667	4.4e-05		0.72667	0.000122		0.72667	1.75e-05
0.73	4.45e-05		0.73	0.0001135		0.73	1.25e-05
0.73333	4.3e-05		0.73333	0.000123		0.73333	6e-06
0.73667	4.8e-05		0.73667	0.0001245		0.73667	4e-06
0.74	4.2e-05		0.74	0.00012		0.74	9e-06
0.74333	4.25e-05		0.74333	0.000116		0.74333	2.5e-06
0.74667	4.6e-05		0.74667	0.0001155		0.74667	1.5e-06
0.75	5.4e-05		0.75	0.000111		0.75	1.55e-05
0.75333	5.7e-05		0.75333	0.000104		0.75333	1.9e-05
0.75667	5.55e-05		0.75667	0.000113		0.75667	1.45e-05
0.76	5.3e-05		0.76	0.000123		0.76	1.85e-05
0.76333	3.65e-05		0.76333	0.0001195		0.76333	1.95e-05
0.76667	2.45e-05		0.76667	0.0001115		0.76667	1.6e-05
0.77	3.05e-05		0.77	9.8e-05		0.77	1.45e-05
0.77333	3.95e-05		0.77333	0.0001045		0.77333	6.5e-06
0.77667	4.6e-05		0.77667	0.000115		0.77667	-3.5e-06
0.78	4.9e-05		0.78	0.0001125		0.78	-3.5e-06
0.78333	4.9e-05		0.78333	0.0001155		0.78333	2.5e-06
0.78667	5e-05		0.78667	0.000115		0.78667	6.5e-06
0.79	5.75e-05		0.79	0.0001145		0.79	2.5e-06
0.79333	5.25e-05		0.79333	0.0001175		0.79333	1.5e-06
0.79667	4.05e-05		0.79667	0.0001235		0.79667	7.5e-06
0.8	4.9e-05		0.8	0.0001275		0.8	1.25e-05
0.80333	5.25e-05		0.80333	0.000123		0.80333	1.9e-05
0.80667	4.45e-05		0.80667	0.0001155		0.80667	2.2e-05
0.81	4.15e-05		0.81	0.000117		0.81	2.15e-05
0.81333	4.1e-05		0.81333	0.0001235		0.81333	2.55e-05
0.81667	4.35e-05		0.81667	0.000119		0.81667	2.55e-05
0.82	4.85e-05		0.82	0.0001215		0.82	1.4e-05
0.82333	4.55e-05		0.82333	0.000135		0.82333	3e-06
0.82667	4.8e-05		0.82667	0.0001355		0.82667	7e-06
0.83	5.5e-05		0.83	0.000133		0.83	1.15e-05
0.83333	4.15e-05		0.83333	0.0001375		0.83333	7.5e-06
0.83667	4e-05		0.83667	0.000133		0.83667	1.35e-05
0.84	5.1e-05		0.84	0.0001365		0.84	1.85e-05
0.84333	4.55e-05		0.84333	0.0001495		0.84333	1.15e-05
0.84667	3.85e-05		0.84667	0.0001395		0.84667	2.5e-06
0.85	4.6e-05		0.85	0.000128		0.85	-8.5e-06
0.85333	6e-05		0.85333	0.0001375		0.85333	-1e-06
0.85667	7.1e-05		0.85667	0.000132		0.85667	6e-06
0.86	6.9e-05		0.86	0.000131		0.86	1.5e-06
0.86333	5.2e-05		0.86333	0.000135		0.86333	3.5e-06
0.86667	4.05e-05		0.86667	0.000127		0.86667	4e-06
0.87	3.3e-05		0.87	0.0001305		0.87	1.5e-06
0.87333	3.7e-05		0.87333	0.0001315		0.87333	4e-06
0.87667	4.55e-05		0.87667	0.000127		0.87667	6.5e-06
0.88	3.9e-05		0.88	0.000133		0.88	2e-06
0.88333	4.25e-05		0.88333	0.000133		0.88333	5.5e-06
0.88667	5.35e-05		0.88667	0.0001305		0.88667	1.15e-05
0.89	5.1e-05		0.89	0.000135		0.89	7.5e-06
0.89333	4.45e-05		0.89333	0.000135		0.89333	3.5e-06
0.89667	4.5e-05		0.89667	0.000139		0.89667	2e-06
0.9	4.65e-05		0.9	0.000131		0.9	9.5e-06
0.90333	2.95e-05		0.90333	0.000135		0.90333	1.05e-05
0.90667	2.4e-05		0.90667	0.00014		0.90667	5e-06
0.91	4.25e-05		0.91	0.000132		0.91	5e-06
0.91333	5e-05		0.91333	0.000133		0.91333	3e-06
0.91667	3.6e-05		0.91667	0.000131		0.91667	-3e-06
0.92	2.85e-05		0.92	0.000119		0.92	-7e-06
0.92333	4.2e-05		0.92333	0.0001265		0.92333	-2e-06
0.92667	4.3e-05		0.92667	0.00015		0.92667	1.5e-06
0.93	4.75e-05		0.93	0.0001585		0.93	0
0.93333	5.35e-05		0.93333	0.000153		0.93333	-5.5e-06
0.93667	4.5e-05		0.93667	0.000153		0.93667	-5.5e-06
0.94	4.6e-05		0.94	0.000156		0.94	-1.4e-05
0.94333	5e-05		0.94333	0.00015		0.94333	-2e-05
0.94667	4.35e-05		0.94667	0.0001445		0.94667	-1.35e-05
0.95	4.4e-05		0.95	0.000148		0.95	-1.25e-05
0.95333	4.45e-05		0.95333	0.000164		0.95333	-8.5e-06
0.95667	4.25e-05		0.95667	0.000169		0.95667	1.05e-05
0.96	4.15e-05		0.96	0.0001655		0.96	1.15e-05
0.96333	3.05e-05		0.96333	0.0001605		0.96333	4e-06
0.96667	3.95e-05		0.96667	0.000152		0.96667	8e-06
0.97	4.6e-05		0.97	0.0001545		0.97	-6e-06
0.97333	4.4e-05		0.97333	0.000155		0.97333	-3e-06
0.97667	4.65e-05		0.97667	0.0001515		0.97667	1.3e-05
0.98	4.35e-05		0.98	0.0001585		0.98	1.2e-05
0.98333	5.55e-05		0.98333	0.0001685		0.98333	1.3e-05
0.98667	5.3e-05		0.98667	0.0001685		0.98667	1.05e-05
0.99	4.35e-05		0.99	0.00016		0.99	4.5e-06
0.99333	3.55e-05		0.99333	0.000154		0.99333	7e-06
0.99667	3.45e-05		0.99667	0.0001585		0.99667	5e-06
1	4.9e-05		1	0.0001695		1	-5e-07
1.00333	5.7e-05		1.00333	0.000171		1.00333	-1.1e-05
1.00667	5.3e-05		1.00667	0.000167		1.00667	-1.45e-05
1.01	4.85e-05		1.01	0.000163		1.01	-3.5e-06
1.01333	5.3e-05		1.01333	0.0001595		1.01333	-5e-07
1.01667	5.45e-05		1.01667	0.000161		1.01667	-6.5e-06
1.02	5e-05		1.02	0.0001695		1.02	-7.5e-06
1.02333	4.05e-05		1.02333	0.000177		1.02333	-1.15e-05
1.02667	4.1e-05		1.02667	0.0001695		1.02667	-1.9e-05
1.03	5.15e-05		1.03	0.0001605		1.03	-2e-05
1.03333	4.9e-05		1.03333	0.0001645		1.03333	-1.05e-05
1.03667	4.55e-05		1.03667	0.00017		1.03667	5e-07
1.04	5.2e-05		1.04	0.000174		1.04	-3e-06
1.04333	3.95e-05		1.04333	0.0001705		1.04333	-1.1e-05
1.04667	3.4e-05		1.04667	0.000159		1.04667	-8e-06
1.05	4.6e-05		1.05	0.0001575		1.05	1.5e-06
1.05333	4.85e-05		1.05333	0.0001625		1.05333	2.5e-06
1.05667	4.05e-05		1.05667	0.000167		1.05667	-1e-06
1.06	3.35e-05		1.06	0.000179		1.06	-1.5e-06
1.06333	3.35e-05		1.06333	0.0001795		1.06333	0
1.06667	3.45e-05		1.06667	0.0001725		1.06667	6e-06
1.07	3.7e-05		1.07	0.000168		1.07	1e-05
1.07333	4.7e-05		1.07333	0.0001765		1.07333	1.25e-05
1.07667	4.6e-05		1.07667	0.0001785		1.07667	1.1e-05
1.08	3.7e-05		1.08	0.0001575		1.08	-4.5e-06
1.08333	4.65e-05		1.08333	0.000165		1.08333	-1.7e-05
1.08667	4.9e-05		1.08667	0.000186		1.08667	-1.9e-05
1.09	3.85e-05		1.09	0.00018		1.09	-8.5e-06
1.09333	4.2e-05		1.09333	0.00017		1.09333	1.5e-06
1.09667	4.15e-05		1.09667	0.000175		1.09667	-1e-05
1.1	4.2e-05		1.1	0.0001905		1.1	-1.65e-05
1.10333	4.8e-05		1.10333	0.000188		1.10333	-1.2e-05
1.10667	4.55e-05		1.10667	0.00018		1.10667	-1.3e-05
1.11	4.8e-05		1.11	0.000178		1.11	-1.3e-05
1.11333	5.25e-05		1.11333	0.0001845		1.11333	-1.45e-05
1.11667	6.05e-05		1.11667	0.0001975		1.11667	-1.55e-05
1.12	6.2e-05		1.12	0.0001955		1.12	-1.5e-05
1.12333	4.6e-05		1.12333	0.0001765		1.12333	-1.3e-05
1.12667	3.75e-05		1.12667	0.0001725		1.12667	-1.15e-05
1.13	3.8e-05		1.13	0.000184		1.13	-1.2e-05
1.13333	4.25e-05		1.13333	0.0001855		1.13333	-2.05e-05
1.13667	4.45e-05		1.13667	0.0001885		1.13667	-1.6e-05
1.14	4.7e-05		1.14	0.000181		1.14	-7.5e-06
1.14333	5.05e-05		1.14333	0.000179		1.14333	-1.7e-05
1.14667	4.7e-05		1.14667	0.0001845		1.14667	-2.3e-05
1.15	5.1e-05		1.15	0.0001835		1.15	-1.1e-05
1.15333	5.6e-05		1.15333	0.0001905		1.15333	5e-07
1.15667	5.6e-05		1.15667	0.000197		1.15667	-1.45e-05
1.16	5e-05		1.16	0.000191		1.16	-2.1e-05
1.16333	4.4e-05		1.16333	0.000178		1.16333	-8.5e-06
1.16667	3.9e-05		1.16667	0.0001845		1.16667	-1e-06
1.17	3.55e-05		1.17	0.0001965		1.17	-5e-06
1.17333	3.5e-05		1.17333	0.0001885		1.17333	-1.45e-05
1.17667	3.7e-05		1.17667	0.0001905		1.17667	-1.3e-05
1.18	5e-05		1.18	0.000199		1.18	-1.15e-05
1.18333	5.25e-05		1.18333	0.000198		1.18333	-1.2e-05
1.18667	5.15e-05		1.18667	0.000185		1.18667	-2e-05
1.19	5.45e-05		1.19	0.0001775		1.19	-2.8e-05
1.19333	4.45e-05		1.19333	0.000196		1.19333	-2.35e-05
1.19667	4.55e-05		1.19667	0.0002025		1.19667	-1.35e-05
1.2	5.15e-05		1.2	0.0001905		1.2	-8e-06
1.20333	4.45e-05		1.20333	0.000187		1.20333	-5.5e-06
1.20667	4.85e-05		1.20667	0.0001955		1.20667	3e-06
1.21	5.05e-05		1.21	0.000202		1.21	-8e-06
1.21333	4e-05		1.21333	0.0002		1.21333	-2.45e-05
1.21667	3.95e-05		1.21667	0.0002095		1.21667	-1.85e-05
1.22	4.35e-05		1.22	0.00022		1.22	-1.7e-05
1.22333	4.2e-05		1.22333	0.0002175		1.22333	-3.1e-05
1.22667	4.4e-05		1.22667	0.0002105		1.22667	-3.45e-05
1.23	5.2e-05		1.23	0.0001985		1.23	-3.1e-05
1.23333	4.75e-05		1.23333	0.000191		1.23333	-2.1e-05
1.23667	4.55e-05		1.23667	0.0001955		1.23667	-1.85e-05
1.24	4.25e-05		1.24	0.000197		1.24	-1.65e-05
1.24333	3.95e-05		1.24333	0.0001995		1.24333	-1.3e-05
1.24667	4.65e-05		1.24667	0.0002065		1.24667	-2.15e-05
1.25	4.9e-05		1.25	0.000206		1.25	-2.25e-05
1.25333	4.9e-05		1.25333	0.000209		1.25333	-1.85e-05
1.25667	5.3e-05		1.25667	0.0002075		1.25667	-2.35e-05
1.26	5.55e-05		1.26	0.000204		1.26	-2.15e-05
1.26333	4.65e-05		1.26333	0.000214		1.26333	-7e-06
1.26667	4.85e-05		1.26667	0.000223		1.26667	-6e-06
1.27	4.65e-05		1.27	0.0002195		1.27	-1.8e-05
1.27333	2.9e-05		1.27333	0.0002025		1.27333	-2.05e-05
1.27667	2.65e-05		1.27667	0.000197		1.27667	-1.75e-05
1.28	3.7e-05		1.28	0.0001975		1.28	-2.5e-05
1.28333	5.55e-05		1.28333	0.000206		1.28333	-2.7e-05
1.28667	5.05e-05		1.28667	0.000216		1.28667	-1.95e-05
1.29	4.45e-05		1.29	0.000217		1.29	-1.15e-05
1.29333	5.15e-05		1.29333	0.000216		1.29333	-8e-06
1.29667	5.15e-05		1.29667	0.0002175		1.29667	-9.5e-06
1.3	4.7e-05		1.3	0.0002155		1.3	-1.5e-05
1.30333	3.35e-05		1.30333	0.000208		1.30333	-1.4e-05
1.30667	2.9e-05		1.30667	0.000206		1.30667	-1.9e-05
1.31	3.15e-05		1.31	0.0002105		1.31	-1.75e-05
1.31333	4.6e-05		1.31333	0.0002185		1.31333	-1.15e-05
1.31667	5.75e-05		1.31667	0.0002155		1.31667	-7e-06
1.32	5.35e-05		1.32	0.000213		1.32	-5e-06
1.32333	5e-05		1.32333	0.0002195		1.32333	-2.15e-05
1.32667	5.8e-05		1.32667	0.0002205		1.32667	-3.3e-05
1.33	6.5e-05		1.33	0.000215		1.33	-3.75e-05
1.33333	5.65e-05		1.33333	0.000223		1.33333	-4.25e-05
1.33667	4.9e-05		1.33667	0.000227		1.33667	-4.55e-05
1.34	5e-05		1.34	0.000213		1.34	-3.2e-05
1.34333	5.3e-05		1.34333	0.000205		1.34333	-2.15e-05
1.34667	5.25e-05		1.34667	0.000204		1.34667	-2.45e-05
1.35	5.1e-05		1.35	0.0002105		1.35	-1.45e-05
1.35333	5.1e-05		1.35333	0.000218		1.35333	-6e-06
1.35667	4.25e-05		1.35667	0.0002215		1.35667	-1.85e-05
1.36	4.15e-05		1.36	0.0002215		1.36	-3.75e-05
1.36333	4.85e-05		1.36333	0.000218		1.36333	-3.95e-05
1.36667	3.9e-05		1.36667	0.000217		1.36667	-2.4e-05
1.37	2.85e-05		1.37	0.000225		1.37	-2.6e-05
1.37333	4.1e-05		1.37333	0.00023		1.37333	-2.8e-05
1.37667	6.1e-05		1.37667	0.0002335		1.37667	-1.5e-05
1.38	5.2e-05		1.38	0.0002285		1.38	-1.6e-05
1.38333	3.8e-05		1.38333	0.0002225		1.38333	-2.2e-05
1.38667	4.5e-05		1.38667	0.000228		1.38667	-1.8e-05
1.39	4.95e-05		1.39	0.000227		1.39	-1.75e-05
1.39333	5.2e-05		1.39333	0.0002245		1.39333	-2.6e-05
1.39667	4.45e-05		1.39667	0.0002235		1.39667	-2.7e-05
1.4	4.05e-05		1.4	0.0002235		1.4	-1.9e-05
1.40333	4.65e-05		1.40333	0.000237		1.40333	-2.15e-05
1.40667	4.3e-05		1.40667	0.000239		1.40667	-2.05e-05
1.41	3.5e-05		1.41	0.00023		1.41	-2.05e-05
1.41333	4.3e-05		1.41333	0.000235		1.41333	-3.3e-05
1.41667	4.75e-05		1.41667	0.0002365		1.41667	-3.6e-05
1.42	4.1e-05		1.42	0.0002315		1.42	-3.4e-05
1.42333	4.3e-05		1.42333	0.0002315		1.42333	-3.95e-05
1.42667	4.5e-05		1.42667	0.0002455		1.42667	-4.65e-05
1.43	5e-05		1.43	0.000235		1.43	-3.1e-05
1.43333	5.75e-05		1.43333	0.0002255		1.43333	-1.85e-05
1.43667	5.6e-05		1.43667	0.000234		1.43667	-2.85e-05
1.44	4.85e-05		1.44	0.0002345		1.44	-3.35e-05
1.44333	4.55e-05		1.44333	0.000241		1.44333	-3.05e-05
1.44667	5.3e-05		1.44667	0.000237		1.44667	-3.2e-05
1.45	5.45e-05		1.45	0.000231		1.45	-3.5e-05
1.45333	4.5e-05		1.45333	0.0002345		1.45333	-3.3e-05
1.45667	4.6e-05		1.45667	0.000244		1.45667	-3.4e-05
1.46	4.4e-05		1.46	0.0002525		1.46	-3.4e-05
1.46333	4.7e-05		1.46333	0.000242		1.46333	-3.5e-05
1.46667	5e-05		1.46667	0.0002305		1.46667	-4.55e-05
1.47	5e-05		1.47	0.0002355		1.47	-4.2e-05
1.47333	4.75e-05		1.47333	0.000238		1.47333	-3.15e-05
1.47667	3.8e-05		1.47667	0.0002365		1.47667	-3.15e-05
1.48	3.85e-05		1.48	0.0002275		1.48	-3.15e-05
1.48333	3.75e-05		1.48333	0.0002235		1.48333	-3.65e-05
1.48667	4.4e-05		1.48667	0.0002315		1.48667	-3.45e-05
1.49	5.8e-05		1.49	0.000237		1.49	-3.3e-05
1.49333	5.75e-05		1.49333	0.000242		1.49333	-3.8e-05
1.49667	4.15e-05		1.49667	0.000237		1.49667	-3.75e-05
1.5	3.15e-05		1.5	0.000235		1.5	-4.75e-05
1.50333	3.15e-05		1.50333	0.0002445		1.50333	-4.7e-05
1.50667	3.95e-05		1.50667	0.0002505		1.50667	-3.15e-05
1.51	5.25e-05		1.51	0.000254		1.51	-3.15e-05
1.51333	5.55e-05		1.51333	0.000257		1.51333	-4.25e-05
1.51667	5.05e-05		1.51667	0.0002615		1.51667	-4.3e-05
1.52	5e-05		1.52	0.000266		1.52	-4.3e-05
1.52333	5.15e-05		1.52333	0.000264		1.52333	-4.25e-05
1.52667	4.35e-05		1.52667	0.000255		1.52667	-3.8e-05
1.53	4.25e-05		1.53	0.0002525		1.53	-3.95e-05
1.53333	4.8e-05		1.53333	0.0002565		1.53333	-4.55e-05
1.53667	5.05e-05		1.53667	0.000256		1.53667	-4.3e-05
1.54	4.25e-05		1.54	0.000245		1.54	-3.55e-05
1.54333	4.25e-05		1.54333	0.0002385		1.54333	-3.55e-05
1.54667	4.7e-05		1.54667	0.000244		1.54667	-2.4e-05
1.55	4.45e-05		1.55	0.000248		1.55	-1.95e-05
1.55333	4.8e-05		1.55333	0.0002455		1.55333	-4.2e-05
1.55667	4.45e-05		1.55667	0.0002415		1.55667	-5.4e-05
1.56	4.25e-05		1.56	0.000245		1.56	-5.4e-05
1.56333	4.5e-05		1.56333	0.0002505		1.56333	-4.95e-05
1.56667	4.05e-05		1.56667	0.0002505		1.56667	-4.25e-05
1.57	4e-05		1.57	0.000256		1.57	-5.25e-05
1.57333	4.35e-05		1.57333	0.000261		1.57333	-5.45e-05
1.57667	4.25e-05		1.57667	0.000258		1.57667	-5.15e-05
1.58	4.65e-05		1.58	0.000253		1.58	-5.85e-05
1.58333	4.75e-05		1.58333	0.0002625		1.58333	-5.05e-05
1.58667	4.75e-05		1.58667	0.000275		1.58667	-3.75e-05
1.59	5.35e-05		1.59	0.000259		1.59	-3.45e-05
1.59333	5.3e-05		1.59333	0.000249		1.59333	-4e-05
1.59667	4.9e-05		1.59667	0.000259		1.59667	-4e-05
1.6	5.2e-05		1.6	0.0002585		1.6	-4.4e-05
1.60333	4.8e-05		1.60333	0.00026		1.60333	-5.1e-05
1.60667	4.05e-05		1.60667	0.0002615		1.60667	-4.7e-05
1.61	4.55e-05		1.61	0.000263		1.61	-4.75e-05
1.61333	4.65e-05		1.61333	0.0002735		1.61333	-5.15e-05
1.61667	4.1e-05		1.61667	0.000271		1.61667	-5.55e-05
1.62	3.8e-05		1.62	0.0002715		1.62	-6e-05
1.62333	2.9e-05		1.62333	0.0002655		1.62333	-5.95e-05
1.62667	3.05e-05		1.62667	0.000251		1.62667	-5.5e-05
1.63	3.3e-05		1.63	0.000256		1.63	-5.55e-05
1.63333	3.85e-05		1.63333	0.000262		1.63333	-5.55e-05
1.63667	4.55e-05		1.63667	0.000255		1.63667	-5.55e-05
1.64	4.35e-05		1.64	0.000255		1.64	-5.7e-05
1.64333	6.1e-05		1.64333	0.0002585		1.64333	-5.25e-05
1.64667	7.4e-05		1.64667	0.0002515		1.64667	-4.3e-05
1.65	6.45e-05		1.65	0.0002545		1.65	-3.6e-05
1.65333	5e-05		1.65333	0.0002705		1.65333	-4.45e-05
1.65667	3.95e-05		1.65667	0.00027		1.65667	-5.7e-05
1.66	4.15e-05		1.66	0.0002595		1.66	-6.3e-05
1.66333	4.85e-05		1.66333	0.000251		1.66333	-7.1e-05
1.66667	4.8e-05		1.66667	0.0002485		1.66667	-7.65e-05
1.67	4.55e-05		1.67	0.0002585		1.67	-7.35e-05
1.67333	3.7e-05		1.67333	0.000267		1.67333	-6.15e-05
1.67667	3.6e-05		1.67667	0.000267		1.67667	-5.5e-05
1.68	4.75e-05		1.68	0.0002695		1.68	-6.6e-05
1.68333	5.2e-05		1.68333	0.000276		1.68333	-7.35e-05
1.68667	4.8e-05		1.68667	0.0002795		1.68667	-6.65e-05
1.69	4.45e-05		1.69	0.0002775		1.69	-5.15e-05
1.69333	4.6e-05		1.69333	0.0002685		1.69333	-5e-05
1.69667	4.55e-05		1.69667	0.000258		1.69667	-6.45e-05
1.7	4.95e-05		1.7	0.000263		1.7	-7.25e-05
1.70333	5.8e-05		1.70333	0.00028		1.70333	-7.3e-05
1.70667	6.35e-05		1.70667	0.000281		1.70667	-7.7e-05
1.71	5.8e-05		1.71	0.0002785		1.71	-6.65e-05
1.71333	5e-05		1.71333	0.0002795		1.71333	-5.85e-05
1.71667	4.5e-05		1.71667	0.0002825		1.71667	-7.15e-05
1.72	4.2e-05		1.72	0.000286		1.72	-6.5e-05
1.72333	4.2e-05		1.72333	0.0002815		1.72333	-5.55e-05
1.72667	4.1e-05		1.72667	0.000286		1.72667	-6.35e-05
1.73	4.2e-05		1.73	0.0002815		1.73	-6.85e-05
1.73333	4.6e-05		1.73333	0.0002785		1.73333	-6.6e-05
1.73667	3.85e-05		1.73667	0.0002855		1.73667	-5.9e-05
1.74	5.05e-05		1.74	0.0002875		1.74	-5.7e-05
1.74333	6.35e-05		1.74333	0.000275		1.74333	-6.15e-05
1.74667	5.5e-05		1.74667	0.000265		1.74667	-6.7e-05
1.75	5.8e-05		1.75	0.000273		1.75	-6.85e-05
1.75333	6.15e-05		1.75333	0.0002775		1.75333	-7.05e-05
1.75667	5.6e-05		1.75667	0.0002825		1.75667	-8.05e-05
1.76	4.4e-05		1.76	0.0002765		1.76	-7.75e-05
1.76333	4.45e-05		1.76333	0.000273		1.76333	-6.5e-05
1.76667	5.25e-05		1.76667	0.0002815		1.76667	-6.25e-05
1.77	5.05e-05		1.77	0.0002885		1.77	-6.1e-05
1.77333	5.05e-05		1.77333	0.000293		1.77333	-7.15e-05
1.77667	5.25e-05		1.77667	0.000296		1.77667	-8.35e-05
1.78	4.4e-05		1.78	0.0003		1.78	-7.15e-05
1.78333	4.55e-05		1.78333	0.0002865		1.78333	-6.95e-05
1.78667	5.3e-05		1.78667	0.0002755		1.78667	-7.5e-05
1.79	4.75e-05		1.79	0.0002855		1.79	-7.7e-05
1.79333	4.35e-05		1.79333	0.000284		1.79333	-6.9e-05
1.79667	4.9e-05		1.79667	0.0002925		1.79667	-6.5e-05
1.8	4.55e-05		1.8	0.0002985		1.8	-6.35e-05
1.80333	4.65e-05		1.80333	0.0002855		1.80333	-6.05e-05
1.80667	5.45e-05		1.80667	0.000292		1.80667	-6.65e-05
1.81	5.65e-05		1.81	0.000302		1.81	-6.15e-05
1.81333	6.05e-05		1.81333	0.0003075		1.81333	-6.45e-05
1.81667	6.05e-05		1.81667	0.000308		1.81667	-7.9e-05
1.82	5.9e-05		1.82	0.0003075		1.82	-8.65e-05
1.82333	6.8e-05		1.82333	0.000297		1.82333	-8.85e-05
1.82667	6.8e-05		1.82667	0.0002905		1.82667	-8.65e-05
1.83	6.1e-05		1.83	0.0002975		1.83	-7.75e-05
1.83333	5.9e-05		1.83333	0.000299		1.83333	-6.9e-05
1.83667	5.15e-05		1.83667	0.0003025		1.83667	-7.45e-05
1.84	4.9e-05		1.84	0.000302		1.84	-7.1e-05
1.84333	4.55e-05		1.84333	0.0002925		1.84333	-6e-05
1.84667	3.5e-05		1.84667	0.00028		1.84667	-6.15e-05
1.85	3.45e-05		1.85	0.00028		1.85	-6.35e-05
1.85333	3.65e-05		1.85333	0.0002855		1.85333	-6.85e-05
1.85667	4.5e-05		1.85667	0.0002815		1.85667	-7.9e-05
1.86	5.1e-05		1.86	0.000285		1.86	-8.3e-05
1.86333	4.75e-05		1.86333	0.0002915		1.86333	-8.5e-05
1.86667	4.4e-05		1.86667	0.000298		1.86667	-8.7e-05
1.87	4.2e-05		1.87	0.000303		1.87	-8.75e-05
1.87333	5.3e-05		1.87333	0.000293		1.87333	-8.45e-05
1.87667	5.6e-05		1.87667	0.0002845		1.87667	-8.25e-05
1.88	4.8e-05		1.88	0.000297		1.88	-7.8e-05
1.88333	4.05e-05		1.88333	0.0003025		1.88333	-6.7e-05
1.88667	3.7e-05		1.88667	0.0002965		1.88667	-7.25e-05
1.89	3.85e-05		1.89	0.0003035		1.89	-8.5e-05
1.89333	3.55e-05		1.89333	0.0003045		1.89333	-8.8e-05
1.89667	3.4e-05		1.89667	0.000301		1.89667	-8.95e-05
1.9	4.25e-05		1.9	0.0002935		1.9	-8.1e-05
1.90333	5.95e-05		1.90333	0.000283		1.90333	-8.2e-05
1.90667	6.3e-05		1.90667	0.0003015		1.90667	-9.95e-05
1.91	5.9e-05		1.91	0.0003185		1.91	-9.35e-05
1.91333	6e-05		1.91333	0.0003095		1.91333	-8.45e-05
1.91667	5.85e-05		1.91667	0.0002985		1.91667	-8.65e-05
1.92	6.4e-05		1.92	0.0002985		1.92	-9.8e-05
1.92333	6.85e-05		1.92333	0.000305		1.92333	-0.0001015
1.92667	5.6e-05		1.92667	0.000308		1.92667	-8.95e-05
1.93	4.25e-05		1.93	0.000314		1.93	-8.25e-05
1.93333	3.8e-05		1.93333	0.0003155		1.93333	-8.95e-05
1.93667	4.35e-05		1.93667	0.000298		1.93667	-9.9e-05
1.94	5.35e-05		1.94	0.0002895		1.94	-9.8e-05
1.94333	6.5e-05		1.94333	0.000299		1.94333	-9.15e-05
1.94667	6.05e-05		1.94667	0.000316		1.94667	-7.5e-05
1.95	4.75e-05		1.95	0.0003185		1.95	-7.8e-05
1.95333	4.95e-05		1.95333	0.0003135		1.95333	-9.5e-05
1.95667	4.4e-05		1.95667	0.000317		1.95667	-9.2e-05
1.96	4.7e-05		1.96	0.0003195		1.96	-9.15e-05
1.96333	6.25e-05		1.96333	0.00032		1.96333	-9.75e-05
1.96667	5.55e-05		1.96667	0.0003145		1.96667	-8.5e-05
1.97	4.6e-05		1.97	0.000313		1.97	-9.45e-05
1.97333	5.25e-05		1.97333	0.0003135		1.97333	-0.000104
1.97667	5.55e-05		1.97667	0.0003115		1.97667	-9e-05
1.98	5.75e-05		1.98	0.00031		1.98	-9e-05
1.98333	5.3e-05		1.98333	0.00031		1.98333	-9.15e-05
1.98667	4.3e-05		1.98667	0.0003135		1.98667	-9.35e-05
1.99	4.8e-05		1.99	0.0003135		1.99	-9.25e-05
1.99333	5.65e-05		1.99333	0.0003035		1.99333	-8.25e-05
1.99667	5.1e-05		1.99667	0.000306		1.99667	-7.25e-05
2	4.6e-05		2	0.0003205		2	-7.35e-05
2.00333	4.85e-05		2.00333	0.0003185		2.00333	-9.3e-05
2.00667	4.6e-05		2.00667	0.0003155		2.00667	-9.75e-05
2.01	3.85e-05		2.01	0.000324		2.01	-8.7e-05
2.01333	4.05e-05		2.01333	0.0003215		2.01333	-9.7e-05
2.01667	4.7e-05		2.01667	0.00033		2.01667	-9.85e-05
2.02	5.15e-05		2.02	0.0003355		2.02	-0.0001005
2.02333	4.9e-05		2.02333	0.0003145		2.02333	-0.0001
2.02667	4.4e-05		2.02667	0.000312		2.02667	-8.95e-05
2.03	5.25e-05		2.03	0.0003075		2.03	-7.75e-05
2.03333	4.75e-05		2.03333	0.0003035		2.03333	-8.3e-05
2.03667	4.6e-05		2.03667	0.000315		2.03667	-9.5e-05
2.04	5.5e-05		2.04	0.000314		2.04	-9.15e-05
2.04333	4.3e-05		2.04333	0.0003215		2.04333	-9.35e-05
2.04667	3.4e-05		2.04667	0.0003305		2.04667	-9.35e-05
2.05	3.85e-05		2.05	0.000325		2.05	-9.3e-05
2.05333	4.25e-05		2.05333	0.0003185		2.05333	-0.000103
2.05667	4.65e-05		2.05667	0.0003115		2.05667	-9.75e-05
2.06	4.75e-05		2.06	0.000307		2.06	-8.95e-05
2.06333	3.8e-05		2.06333	0.0003175		2.06333	-9.45e-05
2.06667	2.95e-05		2.06667	0.0003145		2.06667	-9.95e-05
2.07	3.65e-05		2.07	0.000313		2.07	-0.0001025
2.07333	5e-05		2.07333	0.000322		2.07333	-0.000107
2.07667	5.65e-05		2.07667	0.0003155		2.07667	-0.000112
2.08	5.25e-05		2.08	0.0003215		2.08	-0.000102
2.08333	4.75e-05		2.08333	0.000326		2.08333	-9.45e-05
2.08667	5.15e-05		2.08667	0.000321		2.08667	-0.0001035
2.09	5.2e-05		2.09	0.0003205		2.09	-0.0001005
2.09333	4.2e-05		2.09333	0.0003215		2.09333	-0.000102
2.09667	3.95e-05		2.09667	0.000332		2.09667	-0.0001085
2.1	4.8e-05		2.1	0.0003405		2.1	-0.000106
2.10333	5.35e-05		2.10333	0.000343		2.10333	-0.0001035
2.10667	4.75e-05		2.10667	0.000336		2.10667	-0.000104
2.11	4.9e-05		2.11	0.000333		2.11	-0.000109
2.11333	5.55e-05		2.11333	0.000334		2.11333	-0.0001145
2.11667	5.05e-05		2.11667	0.0003285		2.11667	-0.0001225
2.12	5.05e-05		2.12	0.000339		2.12	-0.0001155
2.12333	5.9e-05		2.12333	0.000344		2.12333	-0.0001155
2.12667	5.85e-05		2.12667	0.000329		2.12667	-0.000119
2.13	4.75e-05		2.13	0.0003225		2.13	-0.0001175
2.13333	4.8e-05		2.13333	0.000321		2.13333	-0.0001155
2.13667	5.5e-05		2.13667	0.000327		2.13667	-0.000113
2.14	5.8e-05		2.14	0.000334		2.14	-0.000115
2.14333	5.3e-05		2.14333	0.00033		2.14333	-0.0001135
2.14667	4.55e-05		2.14667	0.0003345		2.14667	-0.0001185
2.15	4.65e-05		2.15	0.000341		2.15	-0.0001215
2.15333	5e-05		2.15333	0.000349		2.15333	-0.0001295
2.15667	3.55e-05		2.15667	0.0003485		2.15667	-0.0001285
2.16	3.85e-05		2.16	0.000332		2.16	-0.000114
2.16333	5.85e-05		2.16333	0.0003295		2.16333	-0.000107
2.16667	5.55e-05		2.16667	0.0003425		2.16667	-0.00011
2.17	5e-05		2.17	0.000343		2.17	-0.0001195
2.17333	4.55e-05		2.17333	0.0003425		2.17333	-0.000118
2.17667	4.15e-05		2.17667	0.0003445		2.17667	-0.0001135
2.18	4.7e-05		2.18	0.0003455		2.18	-0.0001245
2.18333	4.45e-05		2.18333	0.000339		2.18333	-0.0001235
2.18667	4.1e-05		2.18667	0.000342		2.18667	-0.000109
2.19	4.15e-05		2.19	0.00036		2.19	-0.0001115
2.19333	3.8e-05		2.19333	0.000348		2.19333	-0.000113
2.19667	3.95e-05		2.19667	0.0003335		2.19667	-0.0001175
2.2	3.45e-05		2.2	0.000351		2.2	-0.0001285
2.20333	3.35e-05		2.20333	0.0003625		2.20333	-0.000131
2.20667	4.25e-05		2.20667	0.000351		2.20667	-0.0001235
2.21	5.25e-05		2.21	0.000342		2.21	-0.000118
2.21333	4.7e-05		2.21333	0.000337		2.21333	-0.000123
2.21667	4.6e-05		2.21667	0.000335		2.21667	-0.0001225
2.22	5.75e-05		2.22	0.0003395		2.22	-0.000123
2.22333	5.7e-05		2.22333	0.0003475		2.22333	-0.000132
2.22667	6.1e-05		2.22667	0.000343		2.22667	-0.000141
2.23	5.85e-05		2.23	0.000339		2.23	-0.0001435
2.23333	4.2e-05		2.23333	0.0003515		2.23333	-0.000134
2.23667	3.7e-05		2.23667	0.000354		2.23667	-0.000133
2.24	3.3e-05		2.24	0.0003425		2.24	-0.00014
2.24333	2.9e-05		2.24333	0.0003325		2.24333	-0.000136
2.24667	3.65e-05		2.24667	0.00033		2.24667	-0.000125
2.25	3.95e-05		2.25	0.000342		2.25	-0.000125
2.25333	5.1e-05		2.25333	0.0003565		2.25333	-0.000135
2.25667	5.8e-05		2.25667	0.0003535		2.25667	-0.000139
2.26	5.05e-05		2.26	0.000349		2.26	-0.0001345
2.26333	4.3e-05		2.26333	0.000345		2.26333	-0.000128
2.26667	3.95e-05		2.26667	0.000348		2.26667	-0.000121
2.27	4.75e-05		2.27	0.0003505		2.27	-0.000117
2.27333	5.1e-05		2.27333	0.0003475		2.27333	-0.000113
2.27667	4.4e-05		2.27667	0.000357		2.27667	-0.0001225
2.28	4.2e-05		2.28	0.000363		2.28	-0.000136
2.28333	3.5e-05		2.28333	0.000356		2.28333	-0.0001365
2.28667	3.8e-05		2.28667	0.0003525		2.28667	-0.000135
2.29	5.4e-05		2.29	0.0003515		2.29	-0.0001325
2.29333	6.1e-05		2.29333	0.0003575		2.29333	-0.0001395
2.29667	6.05e-05		2.29667	0.0003555		2.29667	-0.0001425
2.3	5.15e-05		2.3	0.000344		2.3	-0.000124
2.30333	5.25e-05		2.30333	0.000343		2.30333	-0.000118
2.30667	5.15e-05		2.30667	0.000348		2.30667	-0.0001285
2.31	4.8e-05		2.31	0.000367		2.31	-0.000135
2.31333	5.45e-05		2.31333	0.000377		2.31333	-0.000142
2.31667	5.3e-05		2.31667	0.0003585		2.31667	-0.0001315
2.32	4.35e-05		2.32	0.0003455		2.32	-0.0001265
2.32333	4.25e-05		2.32333	0.0003465		2.32333	-0.000141
2.32667	4.75e-05		2.32667	0.000357		2.32667	-0.0001425
2.33	4.35e-05		2.33	0.0003585		2.33	-0.000138
2.33333	3.45e-05		2.33333	0.0003605		2.33333	-0.0001395
2.33667	3.8e-05		2.33667	0.0003615		2.33667	-0.00013
2.34	5.05e-05		2.34	0.000354		2.34	-0.000116
2.34333	4.2e-05		2.34333	0.0003535		2.34333	-0.0001215
2.34667	3.2e-05		2.34667	0.0003465		2.34667	-0.000137
2.35	2.85e-05		2.35	0.0003475		2.35	-0.0001375
2.35333	2.3e-05		2.35333	0.0003555		2.35333	-0.0001325
2.35667	3.25e-05		2.35667	0.0003585		2.35667	-0.00014
2.36	3.6e-05		2.36	0.000363		2.36	-0.0001395
2.36333	3e-05		2.36333	0.000365		2.36333	-0.000127
2.36667	3.2e-05		2.36667	0.000367		2.36667	-0.0001375
2.37	3.45e-05		2.37	0.0003715		2.37	-0.0001445
2.37333	4e-05		2.37333	0.000369		2.37333	-0.000132
2.37667	4.7e-05		2.37667	0.000366		2.37667	-0.0001335
2.38	5.9e-05		2.38	0.0003725		2.38	-0.000142
2.38333	6.1e-05		2.38333	0.0003745		2.38333	-0.000136
2.38667	4.6e-05		2.38667	0.000367		2.38667	-0.0001345
2.39	4e-05		2.39	0.000366		2.39	-0.0001365
2.39333	3.9e-05		2.39333	0.000363		2.39333	-0.0001385
2.39667	4e-05		2.39667	0.0003645		2.39667	-0.0001415
2.4	4.5e-05		2.4	0.000377		2.4	-0.0001435
2.40333	4e-05		2.40333	0.000368		2.40333	-0.000149
2.40667	4.15e-05		2.40667	0.0003585		2.40667	-0.0001555
2.41	5.1e-05		2.41	0.000364		2.41	-0.0001595
2.41333	5e-05		2.41333	0.000367		2.41333	-0.0001515
2.41667	4.8e-05		2.41667	0.0003725		2.41667	-0.0001465
2.42	4.6e-05		2.42	0.0003665		2.42	-0.000147
2.42333	5e-05		2.42333	0.0003645		2.42333	-0.0001495
2.42667	5.55e-05		2.42667	0.0003685		2.42667	-0.000149
2.43	6.1e-05		2.43	0.000364		2.43	-0.000139
2.43333	5.55e-05		2.43333	0.0003615		2.43333	-0.0001425
2.43667	5.05e-05		2.43667	0.000367		2.43667	-0.0001465
2.44	5.7e-05		2.44	0.000369		2.44	-0.000146
2.44333	4.8e-05		2.44333	0.00037		2.44333	-0.000147
2.44667	3.25e-05		2.44667	0.000373		2.44667	-0.0001415
2.45	3.95e-05		2.45	0.000373		2.45	-0.0001375
2.45333	4.95e-05		2.45333	0.000384		2.45333	-0.0001465
2.45667	4.95e-05		2.45667	0.000388		2.45667	-0.0001605
2.46	4.55e-05		2.46	0.000384		2.46	-0.0001565
2.46333	4.25e-05		2.46333	0.0003775		2.46333	-0.0001465
2.46667	4.8e-05		2.46667	0.0003845		2.46667	-0.0001505
2.47	4.75e-05		2.47	0.00039		2.47	-0.000145
2.47333	4.65e-05		2.47333	0.000383		2.47333	-0.000133
2.47667	4.45e-05		2.47667	0.0003705		2.47667	-0.000136
2.48	3.95e-05		2.48	0.0003685		2.48	-0.0001385
2.48333	3.55e-05		2.48333	0.000377		2.48333	-0.0001385
2.48667	3.75e-05		2.48667	0.0003695		2.48667	-0.0001475
2.49	4.45e-05		2.49	0.000367		2.49	-0.000159
2.49333	4.15e-05		2.49333	0.0003705		2.49333	-0.00016
2.49667	3.85e-05		2.49667	0.0003665		2.49667	-0.0001395
2.5	4.15e-05		2.5	0.000362		2.5	-0.000131
2.50333	4.2e-05		2.50333	0.000362		2.50333	-0.0001385
2.50667	5.4e-05		2.50667	0.0003645		2.50667	-0.000151
2.51	6.9e-05		2.51	0.000368		2.51	-0.000165
2.51333	5.25e-05		2.51333	0.0003705		2.51333	-0.000157
2.51667	3.3e-05		2.51667	0.000372		2.51667	-0.0001495
2.52	3.85e-05		2.52	0.000375		2.52	-0.000155
2.52333	5e-05		2.52333	0.000377		2.52333	-0.000154
2.52667	4.8e-05		2.52667	0.0003815		2.52667	-0.0001435
2.53	4.45e-05		2.53	0.000388		2.53	-0.0001495
2.53333	4.1e-05		2.53333	0.0003875		2.53333	-0.0001505
2.53667	2.8e-05		2.53667	0.000383		2.53667	-0.0001515
2.54	3.15e-05		2.54	0.0003805		2.54	-0.0001575
2.54333	3.95e-05		2.54333	0.000387		2.54333	-0.0001585
2.54667	4.05e-05		2.54667	0.0003865		2.54667	-0.0001515
2.55	4.55e-05		2.55	0.000373		2.55	-0.0001545
2.55333	4.2e-05		2.55333	0.000376		2.55333	-0.00016
2.55667	4.2e-05		2.55667	0.0003815		2.55667	-0.000147
2.56	4.6e-05		2.56	0.00038		2.56	-0.00015
2.56333	4.4e-05		2.56333	0.000378		2.56333	-0.00015
2.56667	4.15e-05		2.56667	0.0003725		2.56667	-0.000144
2.57	4.7e-05		2.57	0.000378		2.57	-0.000149
2.57333	4.45e-05		2.57333	0.0003945		2.57333	-0.0001525
2.57667	4.5e-05		2.57667	0.0003875		2.57667	-0.0001615
2.58	4.9e-05		2.58	0.000379		2.58	-0.0001695
2.58333	4e-05		2.58333	0.0003905		2.58333	-0.0001505
2.58667	3.5e-05		2.58667	0.000388		2.58667	-0.0001435
2.59	3.65e-05		2.59	0.000379		2.59	-0.0001525
2.59333	4e-05		2.59333	0.0003825		2.59333	-0.0001585
2.59667	4.3e-05		2.59667	0.0003925		2.59667	-0.0001625
2.6	4.85e-05		2.6	0.0003895		2.6	-0.000156
2.60333	4.6e-05		2.60333	0.000379		2.60333	-0.000158
2.60667	3.4e-05		2.60667	0.0003815		2.60667	-0.000163
2.61	3.3e-05		2.61	0.000392		2.61	-0.0001665
2.61333	4.65e-05		2.61333	0.000388		2.61333	-0.000166
2.61667	4.95e-05		2.61667	0.0003805		2.61667	-0.000161
2.62	4.05e-05		2.62	0.0003895		2.62	-0.0001495
2.62333	4.4e-05		2.62333	0.0003865		2.62333	-0.0001525
2.62667	4.65e-05		2.62667	0.000384		2.62667	-0.0001605
2.63	3.85e-05		2.63	0.000393		2.63	-0.000159
2.63333	3.75e-05		2.63333	0.000389		2.63333	-0.000164
2.63667	3.75e-05		2.63667	0.0003925		2.63667	-0.0001705
2.64	3.55e-05		2.64	0.000404		2.64	-0.000175
2.64333	2.6e-05		2.64333	0.0004005		2.64333	-0.0001725
2.64667	1.95e-05		2.64667	0.000389		2.64667	-0.000173
2.65	2.75e-05		2.65	0.0003975		2.65	-0.000175
2.65333	3.65e-05		2.65333	0.000403		2.65333	-0.000164
2.65667	5e-05		2.65667	0.0003815		2.65667	-0.0001605
2.66	5.8e-05		2.66	0.000375		2.66	-0.0001645
2.66333	4.65e-05		2.66333	0.0003795		2.66333	-0.000161
2.66667	4.15e-05		2.66667	0.0003845		2.66667	-0.0001635
2.67	4e-05		2.67	0.000382		2.67	-0.0001695
2.67333	3.4e-05		2.67333	0.0003725		2.67333	-0.000169
2.67667	2.8e-05		2.67667	0.0003825		2.67667	-0.000161
2.68	2.2e-05		2.68	0.000395		2.68	-0.000154
2.68333	3e-05		2.68333	0.0003865		2.68333	-0.0001615
2.68667	3.7e-05		2.68667	0.0003765		2.68667	-0.000169
2.69	4.2e-05		2.69	0.000388		2.69	-0.0001725
2.69333	4.9e-05		2.69333	0.0003935		2.69333	-0.000171
2.69667	3.75e-05		2.69667	0.000395		2.69667	-0.0001655
2.7	2.7e-05		2.7	0.000406		2.7	-0.000169
2.70333	2.85e-05		2.70333	0.000394		2.70333	-0.000169
2.70667	3.25e-05		2.70667	0.00038		2.70667	-0.0001725
2.71	4.15e-05		2.71	0.0003885		2.71	-0.0001745
2.71333	3.65e-05		2.71333	0.0003905		2.71333	-0.0001685
2.71667	3.8e-05		2.71667	0.000404		2.71667	-0.00017
2.72	3.2e-05		2.72	0.000413		2.72	-0.000174
2.72333	2.55e-05		2.72333	0.000396		2.72333	-0.000172
2.72667	3.4e-05		2.72667	0.00038		2.72667	-0.000169
2.73	3.95e-05		2.73	0.0003775		2.73	-0.0001655
2.73333	3.75e-05		2.73333	0.0003835		2.73333	-0.0001765
2.73667	3.8e-05		2.73667	0.000397		2.73667	-0.000187
2.74	4.6e-05		2.74	0.0004045		2.74	-0.0001815
2.74333	3.9e-05		2.74333	0.000402		2.74333	-0.0001775
2.74667	2.9e-05		2.74667	0.0004085		2.74667	-0.0001735
2.75	3.35e-05		2.75	0.000405		2.75	-0.000175
2.75333	3.5e-05		2.75333	0.0003975		2.75333	-0.000175
2.75667	2.95e-05		2.75667	0.000404		2.75667	-0.000165
2.76	2.65e-05		2.76	0.0004035		2.76	-0.000165
2.76333	3.25e-05		2.76333	0.0004015		2.76333	-0.0001735
2.76667	3.15e-05		2.76667	0.0003885		2.76667	-0.000183
2.77	2.4e-05		2.77	0.0003815		2.77	-0.000178
2.77333	3.45e-05		2.77333	0.0003975		2.77333	-0.000164
2.77667	3.55e-05		2.77667	0.0004095		2.77667	-0.0001655
2.78	2.55e-05		2.78	0.0004095		2.78	-0.000167
2.78333	3.3e-05		2.78333	0.000403		2.78333	-0.000164
2.78667	4.3e-05		2.78667	0.0004005		2.78667	-0.000167
2.79	4.35e-05		2.79	0.000406		2.79	-0.0001655
2.79333	4.75e-05		2.79333	0.0004225		2.79333	-0.000171
2.79667	4.5e-05		2.79667	0.0004185		2.79667	-0.0001745
2.8	5.65e-05		2.8	0.0004005		2.8	-0.000167
2.80333	8.7e-05		2.80333	0.0003965		2.80333	-0.0001695
2.80667	7.35e-05		2.80667	0.0003955		2.80667	-0.000185
2.81	5.05e-05		2.81	0.000404		2.81	-0.0001965
2.81333	3.65e-05		2.81333	0.0004055		2.81333	-0.0001925
2.81667	3.45e-05		2.81667	0.0003965		2.81667	-0.0001935
2.82	4.2e-05		2.82	0.0003975		2.82	-0.00019
2.82333	3.6e-05		2.82333	0.000404		2.82333	-0.0001775
2.82667	3.2e-05		2.82667	0.0004065		2.82667	-0.000172
2.83	3.65e-05		2.83	0.000401		2.83	-0.000172
2.83333	4.1e-05		2.83333	0.000399		2.83333	-0.000177
2.83667	3e-05		2.83667	0.0003975		2.83667	-0.000178
2.84	1.85e-05		2.84	0.0003945		2.84	-0.000178
2.84333	2.1e-05		2.84333	0.0003945		2.84333	-0.000168
2.84667	3.25e-05		2.84667	0.0003945		2.84667	-0.000171
2.85	3.85e-05		2.85	0.0003995		2.85	-0.00018
2.85333	4.1e-05		2.85333	0.000401		2.85333	-0.00018
2.85667	4.2e-05		2.85667	0.000402		2.85667	-0.000177
2.86	3.45e-05		2.86	0.000408		2.86	-0.0001745
2.86333	2e-05		2.86333	0.000408		2.86333	-0.0001855
2.86667	1.6e-05		2.86667	0.000396		2.86667	-0.000184
2.87	2.6e-05		2.87	0.000395		2.87	-0.0001735
2.87333	2.55e-05		2.87333	0.0004125		2.87333	-0.000173
2.87667	1.5e-05		2.87667	0.0004095		2.87667	-0.0001765
2.88	9.5e-06		2.88	0.0003925		2.88	-0.0001715
2.88333	1.35e-05		2.88333	0.000393		2.88333	-0.000176
2.88667	2.9e-05		2.88667	0.0003955		2.88667	-0.000186
2.89	3.9e-05		2.89	0.0004		2.89	-0.0001945
2.89333	3.35e-05		2.89333	0.000417		2.89333	-0.0001995
2.89667	3.15e-05		2.89667	0.0004245		2.89667	-0.0001845
2.9	3.95e-05		2.9	0.000414		2.9	-0.000172
2.90333	4.25e-05		2.90333	0.0003985		2.90333	-0.0001805
2.90667	4.15e-05		2.90667	0.0004015		2.90667	-0.0001925
2.91	3.8e-05		2.91	0.000407		2.91	-0.0001935
2.91333	3.15e-05		2.91333	0.000399		2.91333	-0.0001835
2.91667	3.7e-05		2.91667	0.0003935		2.91667	-0.0001795
2.92	3.35e-05		2.92	0.0004025		2.92	-0.0001905
2.92333	2.65e-05		2.92333	0.0004095		2.92333	-0.000185
2.92667	3.1e-05		2.92667	0.0004075		2.92667	-0.0001775
2.93	3.2e-05		2.93	0.0004105		2.93	-0.000174
2.93333	2.1e-05		2.93333	0.000406		2.93333	-0.0001775
2.93667	1.95e-05		2.93667	0.000411		2.93667	-0.00019
2.94	2.6e-05		2.94	0.000418		2.94	-0.00019
2.94333	1.75e-05		2.94333	0.0004145		2.94333	-0.0001855
2.94667	2.25e-05		2.94667	0.0004115		2.94667	-0.0001795
2.95	3.3e-05		2.95	0.0004005		2.95	-0.0001815
2.95333	2.85e-05		2.95333	0.000391		2.95333	-0.0001915
2.95667	2.9e-05		2.95667	0.0003945		2.95667	-0.0001945
2.96	3.25e-05		2.96	0.0004155		2.96	-0.000195
2.96333	2.95e-05		2.96333	0.000426		2.96333	-0.000189
2.96667	2.25e-05		2.96667	0.0004315		2.96667	-0.0001895
2.97	8.5e-06		2.97	0.000442		2.97	-0.000185
2.97333	1.5e-05		2.97333	0.000425		2.97333	-0.000183
2.97667	2.8e-05		2.97667	0.000403		2.97667	-0.0001945
2.98	3.2e-05		2.98	0.0004115		2.98	-0.000193
2.98333	3.25e-05		2.98333	0.0004205		2.98333	-0.000192
2.98667	2.55e-05		2.98667	0.000415		2.98667	-0.000191
2.99	2.85e-05		2.99	0.0004165		2.99	-0.00019
2.99333	4.05e-05		2.99333	0.000421		2.99333	-0.0001915
2.99667	4.4e-05		2.99667	0.0004155		2.99667	-0.000205
3	3.4e-05		3	0.000419		3	-0.0002095
3.00333	2.95e-05		3.00333	0.000428		3.00333	-0.000208
3.00667	2.3e-05		3.00667	0.0004245		3.00667	-0.0002065
3.01	2.95e-05		3.01	0.0004165		3.01	-0.000195
3.01333	4.9e-05		3.01333	0.0004165		3.01333	-0.0001955
3.01667	4.75e-05		3.01667	0.0004155		3.01667	-0.000203
3.02	3.25e-05		3.02	0.000409		3.02	-0.000202
3.02333	2.95e-05		3.02333	0.000409		3.02333	-0.0001955
3.02667	3.8e-05		3.02667	0.000418		3.02667	-0.0001915
3.03	2.75e-05		3.03	0.00043		3.03	-0.000196
3.03333	1.05e-05		3.03333	0.0004205		3.03333	-0.000202
3.03667	1.75e-05		3.03667	0.00041		3.03667	-0.0002065
3.04	2.1e-05		3.04	0.0004135		3.04	-0.0002015
3.04333	1.85e-05		3.04333	0.0004125		3.04333	-0.0002015
3.04667	2.15e-05		3.04667	0.000413		3.04667	-0.0002025
3.05	2e-05		3.05	0.000423		3.05	-0.0001895
3.05333	2.3e-05		3.05333	0.000429		3.05333	-0.000199
3.05667	1.95e-05		3.05667	0.0004205		3.05667	-0.00021
3.06	1.05e-05		3.06	0.000417		3.06	-0.0001975
3.06333	1.05e-05		3.06333	0.000424		3.06333	-0.0001865
3.06667	1.7e-05		3.06667	0.000429		3.06667	-0.0001935
3.07	2.05e-05		3.07	0.000428		3.07	-0.0002015
3.07333	2.25e-05		3.07333	0.000413		3.07333	-0.000205
3.07667	2.3e-05		3.07667	0.0004025		3.07667	-0.0001995
3.08	1.65e-05		3.08	0.0004185		3.08	-0.0001895
3.08333	1.8e-05		3.08333	0.000424		3.08333	-0.000194
3.08667	1.9e-05		3.08667	0.0004125		3.08667	-0.0001945
3.09	1.15e-05		3.09	0.000407		3.09	-0.0001975
3.09333	1.05e-05		3.09333	0.000417		3.09333	-0.000196
3.09667	1.05e-05		3.09667	0.0004225		3.09667	-0.0002005
3.1	1.2e-05		3.1	0.000432		3.1	-0.0002215
3.10333	2.35e-05		3.10333	0.0004415		3.10333	-0.0002215
3.10667	3.05e-05		3.10667	0.0004355		3.10667	-0.000207
3.11	3.1e-05		3.11	0.000429		3.11	-0.0001985
3.11333	2.35e-05		3.11333	0.000421		3.11333	-0.0001955
3.11667	2.55e-05		3.11667	0.0004135		3.11667	-0.000201
3.12	3.35e-05		3.12	0.0004185		3.12	-0.0002055
3.12333	2.8e-05		3.12333	0.000428		3.12333	-0.000199
3.12667	2.2e-05		3.12667	0.0004305		3.12667	-0.0002005
3.13	2.5e-05		3.13	0.000428		3.13	-0.0002085
3.13333	2.9e-05		3.13333	0.000424		3.13333	-0.000214
3.13667	2.4e-05		3.13667	0.000419		3.13667	-0.000199
3.14	2.8e-05		3.14	0.0004135		3.14	-0.000183
3.14333	2.4e-05		3.14333	0.0004315		3.14333	-0.000186
3.14667	1.05e-05		3.14667	0.00044		3.14667	-0.0002015
3.15	1.9e-05		3.15	0.0004295		3.15	-0.0002095
3.15333	2.2e-05		3.15333	0.0004275		3.15333	-0.0002015
3.15667	1.85e-05		3.15667	0.000425		3.15667	-0.0001935
3.16	1.35e-05		3.16	0.0004285		3.16	-0.000195
3.16333	1.15e-05		3.16333	0.0004375		3.16333	-0.000197
3.16667	1.3e-05		3.16667	0.000447		3.16667	-0.000196
3.17	1.9e-05		3.17	0.000451		3.17	-0.000204
3.17333	2.2e-05		3.17333	0.000448		3.17333	-0.0002035
3.17667	1.3e-05		3.17667	0.0004425		3.17667	-0.0001985
3.18	2.35e-05		3.18	0.0004325		3.18	-0.0001945
3.18333	2.7e-05		3.18333	0.000428		3.18333	-0.0002015
3.18667	2e-05		3.18667	0.000437		3.18667	-0.0002085
3.19	2e-05		3.19	0.0004335		3.19	-0.000215
3.19333	2.6e-05		3.19333	0.0004375		3.19333	-0.000215
3.19667	2.5e-05		3.19667	0.000447		3.19667	-0.00021
3.2	2.05e-05		3.2	0.000443		3.2	-0.0002155
3.20333	2.4e-05		3.20333	0.0004365		3.20333	-0.0002205
3.20667	2.05e-05		3.20667	0.0004415		3.20667	-0.0002275
3.21	1.7e-05		3.21	0.000444		3.21	-0.000227
3.21333	1.65e-05		3.21333	0.000427		3.21333	-0.0002335
3.21667	8e-06		3.21667	0.0004215		3.21667	-0.000234
3.22	6e-06		3.22	0.000423		3.22	-0.0002185
3.22333	1.4e-05		3.22333	0.0004295		3.22333	-0.0002065
3.22667	8.5e-06		3.22667	0.0004375		3.22667	-0.000208
3.23	-7e-06		3.23	0.0004445		3.23	-0.000224
3.23333	-6e-06		3.23333	0.0004425		3.23333	-0.000228
3.23667	5e-06		3.23667	0.0004355		3.23667	-0.000218
3.24	6.5e-06		3.24	0.00044		3.24	-0.000222
3.24333	5e-06		3.24333	0.0004345		3.24333	-0.0002285
3.24667	8e-06		3.24667	0.0004325		3.24667	-0.0002275
3.25	1.65e-05		3.25	0.00044		3.25	-0.0002275
3.25333	1.45e-05		3.25333	0.0004405		3.25333	-0.0002165
3.25667	1.1e-05		3.25667	0.000443		3.25667	-0.0002145
3.26	1.55e-05		3.26	0.000453		3.26	-0.000219
3.26333	2.25e-05		3.26333	0.000458		3.26333	-0.000215
3.26667	3e-05		3.26667	0.000455		3.26667	-0.0002115
3.27	4.2e-05		3.27	0.0004625		3.27	-0.0002005
3.27333	5.85e-05		3.27333	0.0004695		3.27333	-0.0001775
3.27667	7e-05		3.27667	0.0004905		3.27667	-0.0001485
3.28	9e-05		3.28	0.00052		3.28	-0.000127
3.28333	0.0001255		3.28333	0.00052		3.28333	-9.75e-05
3.28667	0.0001645		3.28667	0.0005315		3.28667	-4.3e-05
3.29	0.0002115		3.29	0.00057		3.29	1.1e-05
3.29333	0.0002725		3.29333	0.000606		3.29333	6.25e-05
3.29667	0.0003495		3.29667	0.0006465		3.29667	0.000137
3.3	0.0004475		3.3	0.000701		3.3	0.0002475
3.30333	0.000569		3.30333	0.000777		3.30333	0.0003765
3.30667	0.00072		3.30667	0.0008755		3.30667	0.000528
3.31	0.000914		3.31	0.000997		3.31	0.0007235
3.31333	0.001153		3.31333	0.0011455		3.31333	0.000966
3.31667	0.001437		3.31667	0.0013315		3.31667	0.001246
3.32	0.0017735		3.32	0.001552		3.32	0.0015905
3.32333	0.00219		3.32333	0.001814		3.32333	0.0020065
3.32667	0.002688		3.32667	0.002142		3.32667	0.002461
3.33	0.003255		3.33	0.0025285		3.33	0.0029715
3.33333	0.003889		3.33333	0.0029705		3.33333	0.0035515
3.33667	0.0045925		3.33667	0.003464		3.33667	0.004173
3.34	0.0053645		3.34	0.0040145		3.34	0.004807
3.34333	0.0061845		3.34333	0.0046265		3.34333	0.005459
3.34667	0.0070225		3.34667	0.005267		3.34667	0.006113
3.35	0.0078615		3.35	0.0059255		3.35	0.0067515
3.35333	0.0087095		3.35333	0.006602		3.35333	0.007347
3.35667	0.009528		3.35667	0.0072605		3.35667	0.007869
3.36	0.0103195		3.36	0.0078855		3.36	0.008334
3.36333	0.011085		3.36333	0.008483		3.36333	0.0087345
3.36667	0.011808		3.36667	0.0090305		3.36667	0.0090355
3.37	0.0125065		3.37	0.009522		3.37	0.0092265
3.37333	0.013165		3.37333	0.009963		3.37333	0.0093275
3.37667	0.013761		3.37667	0.010345		3.37667	0.009337
3.38	0.014293		3.38	0.0106655		3.38	0.0092355
3.38333	0.014757		3.38333	0.010926		3.38333	0.009022
3.38667	0.0151705		3.38667	0.011125		3.38667	0.008706
3.39	0.0155265		3.39	0.0112585		3.39	0.0083145
3.39333	0.0158135		3.39333	0.011329		3.39333	0.007839
3.39667	0.0160415		3.39667	0.0113395		3.39667	0.0072905
3.4	0.0162185		3.4	0.011291		3.4	0.006694
3.40333	0.0163575		3.40333	0.011192		3.40333	0.006035
3.40667	0.0164515		3.40667	0.011043		3.40667	0.005311
3.41	0.016493		3.41	0.0108235		3.41	0.0045705
3.41333	0.016491		3.41333	0.010547		3.41333	0.0038305
3.41667	0.016466		3.41667	0.0102235		3.41667	0.0030595
3.42	0.0164035		3.42	0.0098545		3.42	0.0022805
3.42333	0.016282		3.42333	0.0094565		3.42333	0.001524
3.42667	0.0161115		3.42667	0.0090085		3.42667	0.000802
3.43	0.0159		3.43	0.008523		3.43	0.000117
3.43333	0.0156645		3.43333	0.008026		3.43333	-0.0005405
3.43667	0.015392		3.43667	0.0074755		3.43667	-0.0011415
3.44	0.015058		3.44	0.006879		3.44	-0.001679
3.44333	0.0146845		3.44333	0.0062605		3.44333	-0.002182
3.44667	0.014278		3.44667	0.0056135		3.44667	-0.0026225
3.45	0.0138145		3.45	0.004956		3.45	-0.0030065
3.45333	0.0132895		3.45333	0.0042885		3.45333	-0.0033405
3.45667	0.01272		3.45667	0.0036055		3.45667	-0.0036175
3.46	0.012116		3.46	0.002923		3.46	-0.0038515
3.46333	0.011493		3.46333	0.002256		3.46333	-0.0040635
3.46667	0.010846		3.46667	0.001604		3.46667	-0.0042355
3.47	0.0101885		3.47	0.000976		3.47	-0.0043635
3.47333	0.00953		3.47333	0.0003705		3.47333	-0.0044705
3.47667	0.0088495		3.47667	-0.000213		3.47667	-0.004554
3.48	0.0081715		3.48	-0.000765		3.48	-0.0046065
3.48333	0.0075275		3.48333	-0.0012865		3.48333	-0.004635
3.48667	0.006902		3.48667	-0.0017705		3.48667	-0.0046485
3.49	0.006286		3.49	-0.0022135		3.49	-0.0046345
3.49333	0.0056805		3.49333	-0.002618		3.49333	-0.0046095
3.49667	0.0050975		3.49667	-0.002991		3.49667	-0.0045565
3.5	0.0045515		3.5	-0.0033245		3.5	-0.0044825
3.50333	0.0040245		3.50333	-0.0036275		3.50333	-0.0044125
3.50667	0.0035215		3.50667	-0.0039095		3.50667	-0.0043345
3.51	0.0030465		3.51	-0.004169		3.51	-0.004247
3.51333	0.002592		3.51333	-0.004389		3.51333	-0.0041475
3.51667	0.002169		3.51667	-0.004571		3.51667	-0.004038
3.52	0.0017705		3.52	-0.0047295		3.52	-0.003931
3.52333	0.001402		3.52333	-0.004857		3.52333	-0.0038185
3.52667	0.0010785		3.52667	-0.0049615		3.52667	-0.003695
3.53	0.000791		3.53	-0.0050375		3.53	-0.0035795
3.53333	0.0005135		3.53333	-0.005089		3.53333	-0.0034595
3.53667	0.00026		3.53667	-0.005141		3.53667	-0.0033415
3.54	5.8e-05		3.54	-0.005167		3.54	-0.003235
3.54333	-0.0001265		3.54333	-0.005158		3.54333	-0.0031285
3.54667	-0.0003075		3.54667	-0.0051345		3.54667	-0.0030105
3.55	-0.0004545		3.55	-0.005093		3.55	-0.0028935
3.55333	-0.0005805		3.55333	-0.005042		3.55333	-0.0027835
3.55667	-0.000692		3.55667	-0.0049835		3.55667	-0.0026705
3.56	-0.000781		3.56	-0.0049035		3.56	-0.0025765
3.56333	-0.0008585		3.56333	-0.004812		3.56333	-0.0024855
3.56667	-0.000917		3.56667	-0.0047155		3.56667	-0.0023865
3.57	-0.0009555		3.57	-0.0045985		3.57	-0.0022895
3.57333	-0.000992		3.57333	-0.0044915		3.57333	-0.0021935
3.57667	-0.0010255		3.57667	-0.0043785		3.57667	-0.002098
3.58	-0.0010165		3.58	-0.0042405		3.58	-0.001996
3.58333	-0.0009745		3.58333	-0.0040945		3.58333	-0.0018725
3.58667	-0.000921		3.58667	-0.0039405		3.58667	-0.0017245
3.59	-0.0008355		3.59	-0.003781		3.59	-0.0015515
3.59333	-0.000719		3.59333	-0.003612		3.59333	-0.001344
3.59667	-0.000568		3.59667	-0.003417		3.59667	-0.001108
3.6	-0.0003695		3.6	-0.0032075		3.6	-0.0008555
3.60333	-0.0001395		3.60333	-0.002986		3.60333	-0.000568
3.60667	0.000142		3.60667	-0.0027275		3.60667	-0.0002445
3.61	0.000485		3.61	-0.0024465		3.61	0.000104
3.61333	0.0008475		3.61333	-0.002155		3.61333	0.000489
3.61667	0.001239		3.61667	-0.001866		3.61667	0.0008775
3.62	0.0016675		3.62	-0.001549		3.62	0.0012655
3.62333	0.002111		3.62333	-0.001198		3.62333	0.001665
3.62667	0.002565		3.62667	-0.0008395		3.62667	0.0020605
3.63	0.0030245		3.63	-0.0004815		3.63	0.0024435
3.63333	0.0034925		3.63333	-0.000121		3.63333	0.002801
3.63667	0.0039705		3.63667	0.000248		3.63667	0.003138
3.64	0.004445		3.64	0.0006135		3.64	0.00345
3.64333	0.0049065		3.64333	0.0009775		3.64333	0.0037265
3.64667	0.005337		3.64667	0.001339		3.64667	0.003969
3.65	0.00574		3.65	0.00168		3.65	0.004194
3.65333	0.006129		3.65333	0.002		3.65333	0.004393
3.65667	0.00649		3.65667	0.0023105		3.65667	0.0045315
3.66	0.0068175		3.66	0.002603		3.66	0.004636
3.66333	0.0071135		3.66333	0.0028655		3.66333	0.0047245
3.66667	0.007385		3.66667	0.0031085		3.66667	0.00478
3.67	0.0076405		3.67	0.003325		3.67	0.00478
3.67333	0.0078565		3.67333	0.003513		3.67333	0.004747
3.67667	0.00803		3.67667	0.0036955		3.67667	0.0047105
3.68	0.0081755		3.68	0.0038565		3.68	0.0046415
3.68333	0.0083055		3.68333	0.003995		3.68333	0.004533
3.68667	0.0084295		3.68667	0.0041125		3.68667	0.0043965
3.69	0.0085255		3.69	0.0042115		3.69	0.0042285
3.69333	0.0085955		3.69333	0.004294		3.69333	0.004041
3.69667	0.0086745		3.69667	0.004355		3.69667	0.003832
3.7	0.0087495		3.7	0.004387		3.7	0.0035775
3.70333	0.008816		3.70333	0.004402		3.70333	0.0032905
3.70667	0.00887		3.70667	0.004425		3.70667	0.00298
3.71	0.008907		3.71	0.0044285		3.71	0.002639
3.71333	0.0089495		3.71333	0.004402		3.71333	0.0022565
3.71667	0.008998		3.71667	0.004364		3.71667	0.0018165
3.72	0.009041		3.72	0.004326		3.72	0.00133
3.72333	0.009099		3.72333	0.004289		3.72333	0.000795
3.72667	0.0091835		3.72667	0.004249		3.72667	0.0002245
3.73	0.0092715		3.73	0.004197		3.73	-0.0003625
3.73333	0.009382		3.73333	0.004122		3.73333	-0.000979
3.73667	0.0095375		3.73667	0.0040355		3.73667	-0.0016005
3.74	0.009751		3.74	0.003954		3.74	-0.002197
3.74333	0.010022		3.74333	0.003865		3.74333	-0.0027585
3.74667	0.0103595		3.74667	0.003748		3.74667	-0.003265
3.75	0.010801		3.75	0.0036275		3.75	-0.003701
3.75333	0.0113825		3.75333	0.0034915		3.75333	-0.004061
3.75667	0.012144		3.75667	0.003334		3.75667	-0.004336
3.76	0.013156		3.76	0.00316		3.76	-0.0045305
3.76333	0.014514		3.76333	0.002958		3.76333	-0.004649
3.76667	0.016343		3.76667	0.0027225		3.76667	-0.004689
3.77	0.018812		3.77	0.0024425		3.77	-0.004666
3.77333	0.0221455		3.77333	0.0021005		3.77333	-0.0046035
3.77667	0.0265935		3.77667	0.0016725		3.77667	-0.004486
3.78	0.0323725		3.78	0.0011735		3.78	-0.004325
3.78333	0.0396385		3.78333	0.0005745		3.78333	-0.0041325
3.78667	0.0484615		3.78667	-0.0001255		3.78667	-0.003911
3.79	0.058656		3.79	-0.000887		3.79	-0.003693
3.79333	0.069577		3.79333	-0.001692		3.79333	-0.003472
3.79667	0.080013		3.79667	-0.0024865		3.79667	-0.0032485
3.8	0.0884465		3.8	-0.0032195		3.8	-0.0030275
3.80333	0.093737		3.80333	-0.0038905		3.80333	-0.002819
3.80667	0.095517		3.80667	-0.0044465		3.80667	-0.002626
3.81	0.094119		3.81	-0.004851		3.81	-0.0024225
3.81333	0.0902915		3.81333	-0.005111		3.81333	-0.0022275
3.81667	0.084836		3.81667	-0.005228		3.81667	-0.002058
3.82	0.078407		3.82	-0.005224		3.82	-0.0019005
3.82333	0.071551		3.82333	-0.005114		3.82333	-0.001746
3.82667	0.0647175		3.82667	-0.0049275		3.82667	-0.0016065
3.83	0.0582085		3.83	-0.00468		3.83	-0.001483
3.83333	0.052241		3.83333	-0.0043935		3.83333	-0.0013605
3.83667	0.0469655		3.83667	-0.0040775		3.83667	-0.0012445
3.84	0.042477		3.84	-0.003745		3.84	-0.001144
3.84333	0.0388075		3.84333	-0.003417		3.84333	-0.0010505
3.84667	0.03591		3.84667	-0.0031025		3.84667	-0.000962
3.85	0.033697		3.85	-0.0027975		3.85	-0.0008915
3.85333	0.032084		3.85333	-0.002505		3.85333	-0.0008245
3.85667	0.030998		3.85667	-0.0022345		3.85667	-0.000747
3.86	0.030336		3.86	-0.001981		3.86	-0.0006855
3.86333	0.0300055		3.86333	-0.0017465		3.86333	-0.0006315
3.86667	0.029915		3.86667	-0.0015255		3.86667	-0.0005795
3.87	0.0300155		3.87	-0.0013265		3.87	-0.000546
3.87333	0.030231		3.87333	-0.001151		3.87333	-0.0005125
3.87667	0.030459		3.87667	-0.000985		3.87667	-0.000468
3.88	0.030658		3.88	-0.00084		3.88	-0.0004345
3.88333	0.030785		3.88333	-0.0007105		3.88333	-0.000411
3.88667	0.030764		3.88667	-0.000582		3.88667	-0.0003845
3.89	0.030555		3.89	-0.0004725		3.89	-0.000354
3.89333	0.0301705		3.89333	-0.000375		3.89333	-0.00033
3.89667	0.0296225		3.89667	-0.000292		3.89667	-0.0003155
3.9	0.028912		3.9	-0.000211		3.9	-0.0003005
3.90333	0.0280495		3.90333	-0.0001305		3.90333	-0.000277
3.90667	0.0270755		3.90667	-6.4e-05		3.90667	-0.000255
3.91	0.0260285		3.91	2.5e-06		3.91	-0.0002535
3.91333	0.024943		3.91333	7.4e-05		3.91333	-0.000248
3.91667	0.0238395		3.91667	0.000129		3.91667	-0.000224
3.92	0.022756		3.92	0.0001675		3.92	-0.0002115
3.92333	0.021725		3.92333	0.0002015		3.92333	-0.0002165
3.92667	0.020749		3.92667	0.000237		3.92667	-0.000213
3.93	0.0198515		3.93	0.000268		3.93	-0.000212
3.93333	0.0190015		3.93333	0.0002945		3.93333	-0.000222
3.93667	0.01823		3.93667	0.000321		3.93667	-0.0002235
3.94	0.0175355		3.94	0.00034		3.94	-0.000223
3.94333	0.0169005		3.94333	0.0003665		3.94333	-0.000222
3.94667	0.0163355		3.94667	0.0003825		3.94667	-0.0002145
3.95	0.015806		3.95	0.00039		3.95	-0.0002105
3.95333	0.0153265		3.95333	0.000411		3.95333	-0.0002045
3.95667	0.0148975		3.95667	0.000411		3.95667	-0.0002045
3.96	0.0145		3.96	0.000416		3.96	-0.0002195
3.96333	0.014116		3.96333	0.0004325		3.96333	-0.00023
3.96667	0.0137405		3.96667	0.0004375		3.96667	-0.00023
3.97	0.013398		3.97	0.000457		3.97	-0.0002245
3.97333	0.0130725		3.97333	0.0004685		3.97333	-0.000223
3.97667	0.0127465		3.97667	0.000476		3.97667	-0.0002295
3.98	0.012424		3.98	0.000492		3.98	-0.000226
3.98333	0.012097		3.98333	0.000496		3.98333	-0.0002175
3.98667	0.011796		3.98667	0.0004915		3.98667	-0.0002295
3.99	0.01149		3.99	0.000492		3.99	-0.000236
3.99333	0.011174		3.99333	0.000487		3.99333	-0.0002255
3.99667	0.0108555		3.99667	0.0004815		3.99667	-0.0002295
4	0.010523		4	0.000488		4	-0.0002445
4.00333	0.0102075		4.00333	0.0004945		4.00333	-0.000243
4.00667	0.009902		4.00667	0.0004975		4.00667	-0.00024
4.01	0.0095825		4.01	0.0004975		4.01	-0.000246
4.01333	0.009279		4.01333	0.000491		4.01333	-0.0002485
4.01667	0.0089935		4.01667	0.0004955		4.01667	-0.000248
4.02	0.0086925		4.02	0.000505		4.02	-0.0002375
4.02333	0.00841		4.02333	0.000502		4.02333	-0.0002295
4.02667	0.0081535		4.02667	0.0005065		4.02667	-0.00023
4.03	0.007896		4.03	0.000517		4.03	-0.000232
4.03333	0.007649		4.03333	0.000515		4.03333	-0.000244
4.03667	0.0074245		4.03667	0.000502		4.03667	-0.0002485
4.04	0.007208		4.04	0.000504		4.04	-0.000242
4.04333	0.007005		4.04333	0.0005185		4.04333	-0.000248
4.04667	0.006819		4.04667	0.000526		4.04667	-0.000258
4.05	0.006648		4.05	0.000527		4.05	-0.000252
4.05333	0.006485		4.05333	0.0005315		4.05333	-0.000247
4.05667	0.0063315		4.05667	0.000525		4.05667	-0.000244
4.06	0.006192		4.06	0.000516		4.06	-0.000237
4.06333	0.0060565		4.06333	0.000514		4.06333	-0.000239
4.06667	0.005923		4.06667	0.0005135		4.06667	-0.000241
4.07	0.0057965		4.07	0.0005145		4.07	-0.0002405
4.07333	0.0056725		4.07333	0.000521		4.07333	-0.000242
4.07667	0.0055475		4.07667	0.000524		4.07667	-0.0002435
4.08	0.005417		4.08	0.0005265		4.08	-0.0002435
4.08333	0.005288		4.08333	0.000531		4.08333	-0.0002415
4.08667	0.005176		4.08667	0.0005385		4.08667	-0.000244
4.09	0.005055		4.09	0.000543		4.09	-0.0002485
4.09333	0.0049305		4.09333	0.000538		4.09333	-0.000251
4.09667	0.004808		4.09667	0.0005375		4.09667	-0.0002655
4.1	0.004677		4.1	0.0005405		4.1	-0.0002655
4.10333	0.0045535		4.10333	0.0005555		4.10333	-0.000252
4.10667	0.004447		4.10667	0.000558		4.10667	-0.0002515
4.11	0.0043385		4.11	0.0005505		4.11	-0.000252
4.11333	0.0042255		4.11333	0.0005455		4.11333	-0.0002455
4.11667	0.0041175		4.11667	0.000538		4.11667	-0.000235
4.12	0.0040175		4.12	0.0005315		4.12	-0.000239
4.12333	0.0039165		4.12333	0.0005335		4.12333	-0.000246
4.12667	0.0038135		4.12667	0.0005335		4.12667	-0.000248
4.13	0.0037235		4.13	0.000539		4.13	-0.0002525
4.13333	0.0036415		4.13333	0.0005365		4.13333	-0.000258
4.13667	0.0035555		4.13667	0.0005245		4.13667	-0.000268
4.14	0.0034605		4.14	0.000524		4.14	-0.000263
4.14333	0.003377		4.14333	0.0005275		4.14333	-0.000253
4.14667	0.0033105		4.14667	0.0005325		4.14667	-0.000252
4.15	0.003239		4.15	0.0005275		4.15	-0.000251
4.15333	0.0031725		4.15333	0.000535		4.15333	-0.0002445
4.15667	0.0031085		4.15667	0.0005385		4.15667	-0.000239
4.16	0.0030455		4.16	0.0005285		4.16	-0.000245
4.16333	0.0029905		4.16333	0.0005225		4.16333	-0.000251
4.16667	0.0029265		4.16667	0.0005155		4.16667	-0.0002505
4.17	0.0028695		4.17	0.000516		4.17	-0.0002475
4.17333	0.0028225		4.17333	0.0005275		4.17333	-0.0002495
4.17667	0.002767		4.17667	0.000529		4.17667	-0.000248
4.18	0.002728		4.18	0.000528		4.18	-0.0002455
4.18333	0.0026915		4.18333	0.0005325		4.18333	-0.0002575
4.18667	0.002649		4.18667	0.0005315		4.18667	-0.00026
4.19	0.002621		4.19	0.000531		4.19	-0.00025
4.19333	0.002575		4.19333	0.0005295		4.19333	-0.00025
4.19667	0.00253		4.19667	0.000526		4.19667	-0.0002565
4.2	0.0025125		4.2	0.0005265		4.2	-0.000255
4.20333	0.002495		4.20333	0.000522		4.20333	-0.0002485
4.20667	0.002472		4.20667	0.000513		4.20667	-0.0002495
4.21	0.0024545		4.21	0.000519		4.21	-0.000248
4.21333	0.0024295		4.21333	0.0005175		4.21333	-0.0002445
4.21667	0.0023985		4.21667	0.000509		4.21667	-0.0002455
4.22	0.00239		4.22	0.000515		4.22	-0.000238
4.22333	0.002381		4.22333	0.0005205		4.22333	-0.0002345
4.22667	0.002365		4.22667	0.0005325		4.22667	-0.0002365
4.23	0.002352		4.23	0.000536		4.23	-0.000234
4.23333	0.002329		4.23333	0.0005325		4.23333	-0.000236
4.23667	0.002305		4.23667	0.000527		4.23667	-0.00024
4.24	0.0022925		4.24	0.000522		4.24	-0.000244
4.24333	0.0022875		4.24333	0.0005315		4.24333	-0.0002455
4.24667	0.002282		4.24667	0.0005375		4.24667	-0.0002485
4.25	0.002262		4.25	0.000543		4.25	-0.0002465
4.25333	0.0022315		4.25333	0.000554		4.25333	-0.0002365
4.25667	0.002215		4.25667	0.0005555		4.25667	-0.0002485
4.26	0.0021945		4.26	0.0005515		4.26	-0.000266
4.26333	0.002174		4.26333	0.0005485		4.26333	-0.000259
4.26667	0.002158		4.26667	0.0005375		4.26667	-0.0002455
4.27	0.0021365		4.27	0.0005325		4.27	-0.0002385
4.27333	0.0021215		4.27333	0.000542		4.27333	-0.000243
4.27667	0.002106		4.27667	0.0005525		4.27667	-0.0002555
4.28	0.002082		4.28	0.000554		4.28	-0.000262
4.28333	0.0020605		4.28333	0.0005495		4.28333	-0.0002685
4.28667	0.002032		4.28667	0.0005495		4.28667	-0.0002725
4.29	0.002003		4.29	0.0005405		4.29	-0.0002695
4.29333	0.0019725		4.29333	0.0005425		4.29333	-0.000263
4.29667	0.0019525		4.29667	0.0005425		4.29667	-0.0002605
4.3	0.001952		4.3	0.0005345		4.3	-0.000262
4.30333	0.0019315		4.30333	0.00054		4.30333	-0.000262
4.30667	0.0019025		4.30667	0.000534		4.30667	-0.000264
4.31	0.0018755		4.31	0.0005265		4.31	-0.000257
4.31333	0.001845		4.31333	0.000524		4.31333	-0.000252
4.31667	0.0018185		4.31667	0.000532		4.31667	-0.0002605
4.32	0.001803		4.32	0.000536		4.32	-0.000261
4.32333	0.001796		4.32333	0.0005365		4.32333	-0.000242
4.32667	0.001784		4.32667	0.00055		4.32667	-0.000258
4.33	0.00177		4.33	0.000547		4.33	-0.0002705
4.33333	0.001763		4.33333	0.000539		4.33333	-0.0002615
4.33667	0.001756		4.33667	0.0005385		4.33667	-0.0002685
4.34	0.0017365		4.34	0.0005315		4.34	-0.0002725
4.34333	0.001719		4.34333	0.000529		4.34333	-0.0002735
4.34667	0.0017115		4.34667	0.000531		4.34667	-0.000271
4.35	0.0017105		4.35	0.000528		4.35	-0.0002655
4.35333	0.0017065		4.35333	0.000522		4.35333	-0.0002625
4.35667	0.001695		4.35667	0.000518		4.35667	-0.000261
4.36	0.0016745		4.36	0.000521		4.36	-0.0002665
4.36333	0.0016555		4.36333	0.0005325		4.36333	-0.000272
4.36667	0.001648		4.36667	0.0005405		4.36667	-0.000267
4.37	0.001634		4.37	0.0005335		4.37	-0.0002605
4.37333	0.001624		4.37333	0.0005325		4.37333	-0.0002555
4.37667	0.0016145		4.37667	0.0005355		4.37667	-0.00026
4.38	0.0016		4.38	0.000533		4.38	-0.000273
4.38333	0.0015915		4.38333	0.000535		4.38333	-0.0002765
4.38667	0.0015795		4.38667	0.000533		4.38667	-0.000274
4.39	0.001563		4.39	0.0005225		4.39	-0.0002675
4.39333	0.001548		4.39333	0.0005245		4.39333	-0.0002675
4.39667	0.001539		4.39667	0.000519		4.39667	-0.000266
4.4	0.0015185		4.4	0.000506		4.4	-0.0002545
4.40333	0.0014875		4.40333	0.000509		4.40333	-0.000259
4.40667	0.001466		4.40667	0.0005125		4.40667	-0.0002675
4.41	0.0014575		4.41	0.000512		4.41	-0.000271
4.41333	0.001452		4.41333	0.0005175		4.41333	-0.0002675
4.41667	0.001435		4.41667	0.000529		4.41667	-0.00027
4.42	0.001416		4.42	0.000536		4.42	-0.0002655
4.42333	0.001405		4.42333	0.0005275		4.42333	-0.000273
4.42667	0.0013965		4.42667	0.0005235		4.42667	-0.000279
4.43	0.001389		4.43	0.0005265		4.43	-0.0002635
4.43333	0.0013715		4.43333	0.000522		4.43333	-0.000263
4.43667	0.001345		4.43667	0.000524		4.43667	-0.000269
4.44	0.001326		4.44	0.0005255		4.44	-0.0002705
4.44333	0.001326		4.44333	0.0005185		4.44333	-0.0002755
4.44667	0.0013285		4.44667	0.000527		4.44667	-0.000271
4.45	0.0013145		4.45	0.0005395		4.45	-0.0002675
4.45333	0.0012845		4.45333	0.000535		4.45333	-0.000271
4.45667	0.001273		4.45667	0.000531		4.45667	-0.000265
4.46	0.0012705		4.46	0.0005215		4.46	-0.000271
4.46333	0.001262		4.46333	0.0005045		4.46333	-0.0002725
4.46667	0.001262		4.46667	0.000513		4.46667	-0.0002695
4.47	0.001263		4.47	0.000524		4.47	-0.000268
4.47333	0.0012485		4.47333	0.0005245		4.47333	-0.000266
4.47667	0.001222		4.47667	0.000535		4.47667	-0.000269
4.48	0.0012125		4.48	0.0005415		4.48	-0.0002785
4.48333	0.001213		4.48333	0.000539		4.48333	-0.0002815
4.48667	0.0012065		4.48667	0.0005335		4.48667	-0.0002735
4.49	0.001191		4.49	0.000526		4.49	-0.0002705
4.49333	0.001186		4.49333	0.0005225		4.49333	-0.0002735
4.49667	0.001179		4.49667	0.000521		4.49667	-0.0002745
4.5	0.0011595		4.5	0.000524		4.5	-0.000272
4.50333	0.0011455		4.50333	0.000528		4.50333	-0.000269
4.50667	0.0011385		4.50667	0.0005375		4.50667	-0.0002745
4.51	0.0011355		4.51	0.0005485		4.51	-0.000288
4.51333	0.0011325		4.51333	0.000534		4.51333	-0.000285
4.51667	0.0011145		4.51667	0.000519		4.51667	-0.0002715
4.52	0.001092		4.52	0.000521		4.52	-0.000267
4.52333	0.0010815		4.52333	0.0005265		4.52333	-0.0002625
4.52667	0.001081		4.52667	0.000522		4.52667	-0.0002605
4.53	0.00108		4.53	0.000519		4.53	-0.0002735
4.53333	0.001066		4.53333	0.000529		4.53333	-0.00028
4.53667	0.001059		4.53667	0.000536		4.53667	-0.0002785
4.54	0.0010475		4.54	0.00053		4.54	-0.000278
4.54333	0.001026		4.54333	0.0005245		4.54333	-0.0002695
4.54667	0.0010125		4.54667	0.000519		4.54667	-0.000256
4.55	0.0010155		4.55	0.000519		4.55	-0.000267
4.55333	0.0010175		4.55333	0.0005285		4.55333	-0.0002795
4.55667	0.001008		4.55667	0.0005305		4.55667	-0.0002755
4.56	0.000988		4.56	0.000525		4.56	-0.0002835
4.56333	0.000975		4.56333	0.000523		4.56333	-0.000281
4.56667	0.000974		4.56667	0.0005245		4.56667	-0.0002715
4.57	0.000974		4.57	0.000528		4.57	-0.0002775
4.57333	0.000975		4.57333	0.000534		4.57333	-0.000288
4.57667	0.0009675		4.57667	0.000531		4.57667	-0.0002925
4.58	0.000961		4.58	0.000527		4.58	-0.0002865
4.58333	0.0009605		4.58333	0.000539		4.58333	-0.000287
4.58667	0.000954		4.58667	0.0005325		4.58667	-0.0002875
4.59	0.000954		4.59	0.000517		4.59	-0.000282
4.59333	0.00096		4.59333	0.0005285		4.59333	-0.0002815
4.59667	0.0009585		4.59667	0.0005335		4.59667	-0.0002835
4.6	0.0009475		4.6	0.0005295		4.6	-0.0002805
4.60333	0.0009425		4.60333	0.0005205		4.60333	-0.0002835
4.60667	0.000944		4.60667	0.000508		4.60667	-0.0002895
4.61	0.000933		4.61	0.0005305		4.61	-0.0002825
4.61333	0.0009275		4.61333	0.000549		4.61333	-0.0002815
4.61667	0.000932		4.61667	0.000537		4.61667	-0.0002875
4.62	0.000941		4.62	0.000531		4.62	-0.000284
4.62333	0.000941		4.62333	0.0005265		4.62333	-0.000284
4.62667	0.000929		4.62667	0.000525		4.62667	-0.0002895
4.63	0.0009175		4.63	0.000525		4.63	-0.000282
4.63333	0.0009205		4.63333	0.000526		4.63333	-0.000274
4.63667	0.0009345		4.63667	0.0005345		4.63667	-0.000282
4.64	0.000936		4.64	0.000545		4.64	-0.000298
4.64333	0.000919		4.64333	0.0005375		4.64333	-0.0003015
4.64667	0.000913		4.64667	0.000525		4.64667	-0.0002905
4.65	0.0009115		4.65	0.0005165		4.65	-0.000288
4.65333	0.0008975		4.65333	0.0005105		4.65333	-0.0002975
4.65667	0.000894		4.65667	0.000525		4.65667	-0.0002935
4.66	0.0009015		4.66	0.0005385		4.66	-0.000289
4.66333	0.000898		4.66333	0.0005365		4.66333	-0.0002935
4.66667	0.0008925		4.66667	0.0005305		4.66667	-0.0002915
4.67	0.000899		4.67	0.0005255		4.67	-0.0002865
4.67333	0.0008935		4.67333	0.000529		4.67333	-0.0002835
4.67667	0.0008895		4.67667	0.000534		4.67667	-0.0002905
4.68	0.0009		4.68	0.0005345		4.68	-0.000299
4.68333	0.0008925		4.68333	0.0005305		4.68333	-0.0003005
4.68667	0.0008725		4.68667	0.000523		4.68667	-0.000295
4.69	0.0008565		4.69	0.0005285		4.69	-0.0002885
4.69333	0.0008525		4.69333	0.0005345		4.69333	-0.000286
4.69667	0.0008525		4.69667	0.000535		4.69667	-0.0002945
4.7	0.000845		4.7	0.000527		4.7	-0.000298
4.70333	0.0008425		4.70333	0.000514		4.70333	-0.000292
4.70667	0.00084		4.70667	0.000521		4.70667	-0.0002915
4.71	0.000831		4.71	0.0005305		4.71	-0.000284
4.71333	0.000827		4.71333	0.0005245		4.71333	-0.000284
4.71667	0.000812		4.71667	0.000526		4.71667	-0.0002845
4.72	0.0008015		4.72	0.000525		4.72	-0.000284
4.72333	0.0008045		4.72333	0.000526		4.72333	-0.000295
4.72667	0.000804		4.72667	0.0005405		4.72667	-0.000305
4.73	0.0008055		4.73	0.000537		4.73	-0.0003
4.73333	0.0007995		4.73333	0.000527		4.73333	-0.000283
4.73667	0.0007935		4.73667	0.000532		4.73667	-0.0002765
4.74	0.0007885		4.74	0.000529		4.74	-0.000285
4.74333	0.000783		4.74333	0.000523		4.74333	-0.000291
4.74667	0.0007855		4.74667	0.000528		4.74667	-0.0002985
4.75	0.000785		4.75	0.000528		4.75	-0.0002975
4.75333	0.000779		4.75333	0.0005315		4.75333	-0.0002935
4.75667	0.0007815		4.75667	0.000534		4.75667	-0.0002895
4.76	0.000787		4.76	0.000537		4.76	-0.0002845
4.76333	0.000783		4.76333	0.0005365		4.76333	-0.0002995
4.76667	0.0007715		4.76667	0.0005365		4.76667	-0.0003035
4.77	0.000766		4.77	0.000539		4.77	-0.000298
4.77333	0.000765		4.77333	0.0005425		4.77333	-0.0002965
4.77667	0.0007705		4.77667	0.0005525		4.77667	-0.0002895
4.78	0.0007685		4.78	0.0005495		4.78	-0.0002885
4.78333	0.0007565		4.78333	0.0005375		4.78333	-0.0002945
4.78667	0.0007565		4.78667	0.0005345		4.78667	-0.0002925
4.79	0.000758		4.79	0.0005385		4.79	-0.0002885
4.79333	0.000762		4.79333	0.0005375		4.79333	-0.000303
4.79667	0.000772		4.79667	0.0005335		4.79667	-0.0003085
4.8	0.0007635		4.8	0.000529		4.8	-0.0002895
4.80333	0.00076		4.80333	0.00053		4.80333	-0.000287
4.80667	0.000755		4.80667	0.0005275		4.80667	-0.000296
4.81	0.0007445		4.81	0.0005235		4.81	-0.000301
4.81333	0.00074		4.81333	0.0005315		4.81333	-0.0002955
4.81667	0.000745		4.81667	0.000532		4.81667	-0.000284
4.82	0.000742		4.82	0.00053		4.82	-0.0002835
4.82333	0.0007435		4.82333	0.000539		4.82333	-0.0002895
4.82667	0.00075		4.82667	0.0005425		4.82667	-0.000296
4.83	0.000747		4.83	0.000541		4.83	-0.0002985
4.83333	0.000754		4.83333	0.0005385		4.83333	-0.0002955
4.83667	0.0007445		4.83667	0.000538		4.83667	-0.000295
4.84	0.0007445		4.84	0.0005425		4.84	-0.0003
4.84333	0.0007515		4.84333	0.0005405		4.84333	-0.0003065
4.84667	0.0007455		4.84667	0.000534		4.84667	-0.0003015
4.85	0.0007485		4.85	0.0005385		4.85	-0.0003025
4.85333	0.0007425		4.85333	0.000547		4.85333	-0.0003065
4.85667	0.000732		4.85667	0.000541		4.85667	-0.0002975
4.86	0.0007375		4.86	0.000542		4.86	-0.0002975
4.86333	0.000739		4.86333	0.0005395		4.86333	-0.000302
4.86667	0.0007335		4.86667	0.000526		4.86667	-0.0003065
4.87	0.0007295		4.87	0.000525		4.87	-0.000312
4.87333	0.000724		4.87333	0.0005295		4.87333	-0.0003115
4.87667	0.0007265		4.87667	0.00053		4.87667	-0.000312
4.88	0.0007205		4.88	0.000538		4.88	-0.000313
4.88333	0.000714		4.88333	0.000542		4.88333	-0.0003045
4.88667	0.0007235		4.88667	0.000534		4.88667	-0.0003
4.89	0.000725		4.89	0.000525		4.89	-0.0003045
4.89333	0.0007075		4.89333	0.000531		4.89333	-0.0003185
4.89667	0.000697		4.89667	0.000534		4.89667	-0.0003255
4.9	0.0006895		4.9	0.0005315		4.9	-0.0003105
4.90333	0.000683		4.90333	0.000532		4.90333	-0.0003025
4.90667	0.000691		4.90667	0.000528		4.90667	-0.000293
4.91	0.0006915		4.91	0.000523		4.91	-0.0002895
4.91333	0.0006905		4.91333	0.000518		4.91333	-0.0002985
4.91667	0.000691		4.91667	0.000521		4.91667	-0.000301
4.92	0.00069		4.92	0.0005325		4.92	-0.0002965
4.92333	0.00069		4.92333	0.0005425		4.92333	-0.000294
4.92667	0.0006945		4.92667	0.000541		4.92667	-0.000293
4.93	0.000692		4.93	0.000532		4.93	-0.0003015
4.93333	0.000684		4.93333	0.000533		4.93333	-0.000306
4.93667	0.000695		4.93667	0.0005335		4.93667	-0.000303
4.94	0.0007045		4.94	0.000527		4.94	-0.0003025
4.94333	0.0007015		4.94333	0.000533		4.94333	-0.0003065
4.94667	0.000703		4.94667	0.000534		4.94667	-0.0003075
4.95	0.0006985		4.95	0.0005285		4.95	-0.0002995
4.95333	0.0006955		4.95333	0.000531		4.95333	-0.0003005
4.95667	0.000701		4.95667	0.000527		4.95667	-0.0003035
4.96	0.0007055		4.96	0.0005255		4.96	-0.0002995
4.96333	0.0007055		4.96333	0.000529		4.96333	-0.0002945
4.96667	0.000711		4.96667	0.000544		4.96667	-0.000295
4.97	0.000722		4.97	0.000543		4.97	-0.000304
4.97333	0.0007275		4.97333	0.0005355		4.97333	-0.0003095
4.97667	0.000729		4.97667	0.000538		4.97667	-0.0003025
4.98	0.000719		4.98	0.0005465		4.98	-0.0002975
4.98333	0.0007155		4.98333	0.0005495		4.98333	-0.0002915
4.98667	0.000727		4.98667	0.000542		4.98667	-0.0002885
4.99	0.0007275		4.99	0.0005455		4.99	-0.000301
4.99333	0.0007235		4.99333	0.0005385		4.99333	-0.0003055
4.99667	0.000721		4.99667	0.00053		4.99667	-0.0003005
5	0.000712		5	0.0005305		5	-0.000304
5.00333	0.0007065		5.00333	0.0005275		5.00333	-0.000313
5.00667	0.0007115		5.00667	0.000522		5.00667	-0.000309
5.01	0.0007105		5.01	0.000529		5.01	-0.0002965
5.01333	0.000709		5.01333	0.0005375		5.01333	-0.00029
5.01667	0.0007225		5.01667	0.0005335		5.01667	-0.0002865
5.02	0.000724		5.02	0.0005345		5.02	-0.000296
5.02333	0.000712		5.02333	0.000548		5.02333	-0.0003055
5.02667	0.000704		5.02667	0.000569		5.02667	-0.000308
5.03	0.0007		5.03	0.00057		5.03	-0.000303
5.03333	0.000691		5.03333	0.0005535		5.03333	-0.0002985
5.03667	0.000684		5.03667	0.00055		5.03667	-0.000299
5.04	0.000683		5.04	0.00055		5.04	-0.0002965
5.04333	0.0006745		5.04333	0.000547		5.04333	-0.0002945
5.04667	0.000667		5.04667	0.0005475		5.04667	-0.0003
5.05	0.00067		5.05	0.000544		5.05	-0.0002935
5.05333	0.0006775		5.05333	0.000537		5.05333	-0.0002925
5.05667	0.0006675		5.05667	0.000531		5.05667	-0.0003025
5.06	0.000657		5.06	0.000533		5.06	-0.000308
5.06333	0.000657		5.06333	0.0005395		5.06333	-0.000321
5.06667	0.0006485		5.06667	0.0005515		5.06667	-0.000321
5.07	0.0006325		5.07	0.000568		5.07	-0.0003135
5.07333	0.000634		5.07333	0.00057		5.07333	-0.000312
5.07667	0.000646		5.07667	0.0005585		5.07667	-0.000305
5.08	0.00063		5.08	0.0005465		5.08	-0.000309
5.08333	0.000623		5.08333	0.000542		5.08333	-0.0003145
5.08667	0.000636		5.08667	0.000539		5.08667	-0.000306
5.09	0.000632		5.09	0.0005415		5.09	-0.000305
5.09333	0.0006265		5.09333	0.000551		5.09333	-0.0003035
5.09667	0.0006145		5.09667	0.0005495		5.09667	-0.0003055
5.1	0.0006115		5.1	0.000539		5.1	-0.000305
5.10333	0.000618		5.10333	0.0005375		5.10333	-0.0003025
5.10667	0.0006105		5.10667	0.000544		5.10667	-0.0003155
5.11	0.000601		5.11	0.000544		5.11	-0.0003155
5.11333	0.000588		5.11333	0.0005385		5.11333	-0.000304
5.11667	0.000593		5.11667	0.000549		5.11667	-0.000309
5.12	0.000603		5.12	0.0005595		5.12	-0.000312
5.12333	0.0006005		5.12333	0.0005425		5.12333	-0.0003105
5.12667	0.000602		5.12667	0.000527		5.12667	-0.000316
5.13	0.0006045		5.13	0.000543		5.13	-0.0003185
5.13333	0.0006045		5.13333	0.0005625		5.13333	-0.000307
5.13667	0.0006		5.13667	0.000561		5.13667	-0.0003015
5.14	0.0005865		5.14	0.00055		5.14	-0.000308
5.14333	0.000593		5.14333	0.000546		5.14333	-0.000315
5.14667	0.000601		5.14667	0.0005445		5.14667	-0.000315
5.15	0.0005915		5.15	0.0005465		5.15	-0.0003145
5.15333	0.000589		5.15333	0.0005445		5.15333	-0.000319
5.15667	0.000594		5.15667	0.000544		5.15667	-0.0003125
5.16	0.000586		5.16	0.000552		5.16	-0.0003035
5.16333	0.0005835		5.16333	0.000548		5.16333	-0.0003095
5.16667	0.000591		5.16667	0.0005575		5.16667	-0.0003215
5.17	0.0005875		5.17	0.0005675		5.17	-0.000324
5.17333	0.000589		5.17333	0.0005535		5.17333	-0.0003195
5.17667	0.000589		5.17667	0.0005495		5.17667	-0.0003125
5.18	0.000586		5.18	0.000552		5.18	-0.000315
5.18333	0.0005905		5.18333	0.000541		5.18333	-0.0003185
5.18667	0.000578		5.18667	0.00055		5.18667	-0.000322
5.19	0.000579		5.19	0.0005645		5.19	-0.0003205
5.19333	0.00059		5.19333	0.000547		5.19333	-0.000304
5.19667	0.000576		5.19667	0.000535		5.19667	-0.000299
5.2	0.0005605		5.2	0.000543		5.2	-0.0003165
5.20333	0.0005635		5.20333	0.0005445		5.20333	-0.000325
5.20667	0.0005705		5.20667	0.00055		5.20667	-0.0003165
5.21	0.000561		5.21	0.0005545		5.21	-0.000317
5.21333	0.0005555		5.21333	0.000547		5.21333	-0.0003105
5.21667	0.00055		5.21667	0.0005545		5.21667	-0.0003025
5.22	0.000544		5.22	0.000562		5.22	-0.000312
5.22333	0.0005485		5.22333	0.000552		5.22333	-0.0003185
5.22667	0.000545		5.22667	0.000543		5.22667	-0.00031
5.23	0.0005365		5.23	0.000551		5.23	-0.0003075
5.23333	0.0005255		5.23333	0.000553		5.23333	-0.000317
5.23667	0.000523		5.23667	0.0005435		5.23667	-0.000325
5.24	0.0005355		5.24	0.0005495		5.24	-0.000319
5.24333	0.000529		5.24333	0.0005555		5.24333	-0.0003085
5.24667	0.0005115		5.24667	0.0005535		5.24667	-0.000307
5.25	0.0005055		5.25	0.0005545		5.25	-0.000297
5.25333	0.000499		5.25333	0.000559		5.25333	-0.000298
5.25667	0.000502		5.25667	0.000561		5.25667	-0.0003185
5.26	0.000511		5.26	0.0005575		5.26	-0.0003185
5.26333	0.0005025		5.26333	0.000552		5.26333	-0.0003165
5.26667	0.0004885		5.26667	0.000548		5.26667	-0.000318
5.27	0.000486		5.27	0.0005455		5.27	-0.000316
5.27333	0.000486		5.27333	0.0005435		5.27333	-0.000323
5.27667	0.000477		5.27667	0.0005385		5.27667	-0.0003335
5.28	0.0004795		5.28	0.0005425		5.28	-0.0003345
5.28333	0.000483		5.28333	0.0005505		5.28333	-0.0003195
5.28667	0.000478		5.28667	0.0005535		5.28667	-0.0003125
5.29	0.000477		5.29	0.0005525		5.29	-0.000311
5.29333	0.0004785		5.29333	0.000549		5.29333	-0.000313
5.29667	0.0004815		5.29667	0.000556		5.29667	-0.0003155
5.3	0.000471		5.3	0.000566		5.3	-0.0003215
5.30333	0.000458		5.30333	0.00055		5.30333	-0.000332
5.30667	0.000464		5.30667	0.0005445		5.30667	-0.000328
5.31	0.0004705		5.31	0.00056		5.31	-0.000324
5.31333	0.00047		5.31333	0.0005585		5.31333	-0.000323
5.31667	0.0004655		5.31667	0.0005575		5.31667	-0.000321
5.32	0.000466		5.32	0.0005575		5.32	-0.000328
5.32333	0.0004715		5.32333	0.000551		5.32333	-0.0003345
5.32667	0.0004515		5.32667	0.0005445		5.32667	-0.000327
5.33	0.000439		5.33	0.0005495		5.33	-0.0003095
5.33333	0.000438		5.33333	0.000555		5.33333	-0.000305
5.33667	0.0004325		5.33667	0.0005425		5.33667	-0.000322
5.34	0.000442		5.34	0.0005395		5.34	-0.0003275
5.34333	0.000443		5.34333	0.0005475		5.34333	-0.000318
5.34667	0.00043		5.34667	0.000544		5.34667	-0.0003295
5.35	0.0004245		5.35	0.0005415		5.35	-0.0003355
5.35333	0.0004275		5.35333	0.000538		5.35333	-0.0003335
5.35667	0.0004335		5.35667	0.000546		5.35667	-0.000339
5.36	0.000433		5.36	0.0005655		5.36	-0.000337
5.36333	0.000438		5.36333	0.000568		5.36333	-0.000336
5.36667	0.0004345		5.36667	0.0005635		5.36667	-0.0003365
5.37	0.0004345		5.37	0.000556		5.37	-0.0003355
5.37333	0.0004445		5.37333	0.0005515		5.37333	-0.000327
5.37667	0.000433		5.37667	0.0005655		5.37667	-0.000322
5.38	0.0004205		5.38	0.000569		5.38	-0.00033
5.38333	0.000416		5.38333	0.0005595		5.38333	-0.000328
5.38667	0.000418		5.38667	0.0005555		5.38667	-0.0003195
5.39	0.000417		5.39	0.0005505		5.39	-0.000317
5.39333	0.0004195		5.39333	0.000549		5.39333	-0.000313
5.39667	0.000418		5.39667	0.000559		5.39667	-0.000312
5.4	0.0004195		5.4	0.000559		5.4	-0.00032
5.40333	0.0004315		5.40333	0.0005495		5.40333	-0.0003285
5.40667	0.0004335		5.40667	0.000555		5.40667	-0.000325
5.41	0.000423		5.41	0.0005485		5.41	-0.000328
5.41333	0.0004165		5.41333	0.0005455		5.41333	-0.0003365
5.41667	0.0004165		5.41667	0.000557		5.41667	-0.0003385
5.42	0.000415		5.42	0.000567		5.42	-0.000327
5.42333	0.0004215		5.42333	0.0005715		5.42333	-0.0003195
5.42667	0.0004265		5.42667	0.0005635		5.42667	-0.0003235
5.43	0.0004235		5.43	0.0005675		5.43	-0.000325
5.43333	0.000428		5.43333	0.000565		5.43333	-0.000326
5.43667	0.000424		5.43667	0.00056		5.43667	-0.0003225
5.44	0.0004175		5.44	0.000565		5.44	-0.000324
5.44333	0.000419		5.44333	0.000566		5.44333	-0.0003305
5.44667	0.0004095		5.44667	0.000555		5.44667	-0.000342
5.45	0.0004025		5.45	0.0005455		5.45	-0.000336
5.45333	0.000403		5.45333	0.000555		5.45333	-0.0003255
5.45667	0.000412		5.45667	0.000548		5.45667	-0.0003375
5.46	0.000418		5.46	0.00054		5.46	-0.000338
5.46333	0.000418		5.46333	0.0005535		5.46333	-0.00033
5.46667	0.0004245		5.46667	0.000562		5.46667	-0.000329
5.47	0.0004225		5.47	0.0005595		5.47	-0.000334
5.47333	0.0004115		5.47333	0.0005555		5.47333	-0.000336
5.47667	0.000408		5.47667	0.0005565		5.47667	-0.000323
5.48	0.000414		5.48	0.0005595		5.48	-0.000322
5.48333	0.000428		5.48333	0.0005515		5.48333	-0.0003325
5.48667	0.0004425		5.48667	0.0005445		5.48667	-0.000331
5.49	0.000436		5.49	0.000547		5.49	-0.000325
5.49333	0.0004265		5.49333	0.000551		5.49333	-0.000317
5.49667	0.0004295		5.49667	0.000555		5.49667	-0.000318
5.5	0.000429		5.5	0.0005545		5.5	-0.0003235
5.50333	0.0004315		5.50333	0.0005655		5.50333	-0.000321
5.50667	0.0004335		5.50667	0.0005705		5.50667	-0.000324
5.51	0.0004235		5.51	0.0005665		5.51	-0.00033
5.51333	0.0004245		5.51333	0.0005555		5.51333	-0.0003275
5.51667	0.0004345		5.51667	0.0005475		5.51667	-0.0003195
5.52	0.000437		5.52	0.000558		5.52	-0.0003175
5.52333	0.0004385		5.52333	0.0005675		5.52333	-0.0003255
5.52667	0.000441		5.52667	0.0005675		5.52667	-0.000329
5.53	0.0004515		5.53	0.000556		5.53	-0.0003305
5.53333	0.0004475		5.53333	0.000552		5.53333	-0.000324
5.53667	0.0004335		5.53667	0.000554		5.53667	-0.0003185
5.54	0.000431		5.54	0.0005525		5.54	-0.000328
5.54333	0.000433		5.54333	0.00056		5.54333	-0.0003255
5.54667	0.000433		5.54667	0.0005605		5.54667	-0.000318
5.55	0.000428		5.55	0.000555		5.55	-0.000311
5.55333	0.0004235		5.55333	0.0005595		5.55333	-0.000309
5.55667	0.000422		5.55667	0.000558		5.55667	-0.0003145
5.56	0.0004255		5.56	0.0005545		5.56	-0.000323
5.56333	0.000433		5.56333	0.0005535		5.56333	-0.0003405
5.56667	0.000438		5.56667	0.000546		5.56667	-0.000349
5.57	0.0004265		5.57	0.0005475		5.57	-0.0003445
5.57333	0.00042		5.57333	0.000552		5.57333	-0.00034
5.57667	0.0004275		5.57667	0.0005575		5.57667	-0.000331
5.58	0.0004345		5.58	0.0005685		5.58	-0.00032
5.58333	0.0004325		5.58333	0.000563		5.58333	-0.000319
5.58667	0.0004275		5.58667	0.000549		5.58667	-0.0003305
5.59	0.000426		5.59	0.0005465		5.59	-0.00033
5.59333	0.000423		5.59333	0.0005535		5.59333	-0.0003225
5.59667	0.0004255		5.59667	0.000553		5.59667	-0.000329
5.6	0.00043		5.6	0.0005535		5.6	-0.0003325
5.60333	0.0004245		5.60333	0.0005585		5.60333	-0.000325
5.60667	0.000424		5.60667	0.000563		5.60667	-0.000327
5.61	0.000429		5.61	0.0005615		5.61	-0.000331
5.61333	0.000428		5.61333	0.000555		5.61333	-0.0003305
5.61667	0.0004215		5.61667	0.00056		5.61667	-0.000343
5.62	0.000421		5.62	0.000565		5.62	-0.0003415
5.62333	0.000432		5.62333	0.000565		5.62333	-0.000331
5.62667	0.0004435		5.62667	0.0005545		5.62667	-0.0003285
5.63	0.0004315		5.63	0.000542		5.63	-0.0003305
5.63333	0.000424		5.63333	0.000548		5.63333	-0.0003285
5.63667	0.0004385		5.63667	0.000564		5.63667	-0.000321
5.64	0.000447		5.64	0.0005645		5.64	-0.000313
5.64333	0.000456		5.64333	0.000549		5.64333	-0.000313
5.64667	0.0004605		5.64667	0.000547		5.64667	-0.0003185
5.65	0.000471		5.65	0.000553		5.65	-0.000324
5.65333	0.0004725		5.65333	0.0005535		5.65333	-0.000314
5.65667	0.000459		5.65667	0.0005545		5.65667	-0.0003095
5.66	0.0004585		5.66	0.00056		5.66	-0.000328
5.66333	0.000468		5.66333	0.0005665		5.66333	-0.0003355
5.66667	0.000471		5.66667	0.0005605		5.66667	-0.000339
5.67	0.0004705		5.67	0.0005515		5.67	-0.000339
5.67333	0.0004755		5.67333	0.0005515		5.67333	-0.000336
5.67667	0.000473		5.67667	0.000552		5.67667	-0.0003345
5.68	0.0004755		5.68	0.000558		5.68	-0.0003235
5.68333	0.00049		5.68333	0.000554		5.68333	-0.000333
5.68667	0.0004955		5.68667	0.0005525		5.68667	-0.000346
5.69	0.000483		5.69	0.0005625		5.69	-0.000335
5.69333	0.000477		5.69333	0.000558		5.69333	-0.000327
5.69667	0.0004755		5.69667	0.000557		5.69667	-0.0003315
5.7	0.0004675		5.7	0.000562		5.7	-0.0003425
5.70333	0.0004685		5.70333	0.000561		5.70333	-0.000341
5.70667	0.000481		5.70667	0.000562		5.70667	-0.0003315
5.71	0.0004855		5.71	0.000566		5.71	-0.000328
5.71333	0.000475		5.71333	0.0005675		5.71333	-0.0003355
5.71667	0.0004745		5.71667	0.000561		5.71667	-0.000329
5.72	0.000473		5.72	0.000555		5.72	-0.0003195
5.72333	0.00047		5.72333	0.000552		5.72333	-0.000323
5.72667	0.0004735		5.72667	0.0005515		5.72667	-0.0003205
5.73	0.000472		5.73	0.0005555		5.73	-0.000329
5.73333	0.000457		5.73333	0.0005595		5.73333	-0.0003345
5.73667	0.00044		5.73667	0.0005555		5.73667	-0.0003285
5.74	0.000437		5.74	0.000551		5.74	-0.000322
5.74333	0.0004405		5.74333	0.0005435		5.74333	-0.000317
5.74667	0.0004395		5.74667	0.0005375		5.74667	-0.000318
5.75	0.0004355		5.75	0.0005325		5.75	-0.0003275
5.75333	0.000433		5.75333	0.000536		5.75333	-0.0003345
5.75667	0.000427		5.75667	0.000548		5.75667	-0.0003265
5.76	0.000414		5.76	0.0005575		5.76	-0.000337
5.76333	0.000405		5.76333	0.0005635		5.76333	-0.000345
5.76667	0.00041		5.76667	0.0005645		5.76667	-0.000346
5.77	0.000406		5.77	0.0005585		5.77	-0.000343
5.77333	0.0004		5.77333	0.000555		5.77333	-0.0003315
5.77667	0.000401		5.77667	0.000564		5.77667	-0.000338
5.78	0.0003905		5.78	0.0005645		5.78	-0.000342
5.78333	0.000387		5.78333	0.0005585		5.78333	-0.000338
5.78667	0.0003895		5.78667	0.0005575		5.78667	-0.0003265
5.79	0.0003875		5.79	0.00055		5.79	-0.000328
5.79333	0.000392		5.79333	0.0005525		5.79333	-0.0003435
5.79667	0.0003895		5.79667	0.000572		5.79667	-0.0003405
5.8	0.0003905		5.8	0.0005765		5.8	-0.000329
5.80333	0.0003945		5.80333	0.0005695		5.80333	-0.0003245
5.80667	0.000389		5.80667	0.000565		5.80667	-0.000328
5.81	0.00038		5.81	0.000555		5.81	-0.00034
5.81333	0.0003845		5.81333	0.0005435		5.81333	-0.0003375
5.81667	0.0003865		5.81667	0.0005445		5.81667	-0.000331
5.82	0.0003745		5.82	0.0005585		5.82	-0.0003365
5.82333	0.0003685		5.82333	0.0005725		5.82333	-0.0003395
5.82667	0.0003625		5.82667	0.0005695		5.82667	-0.000345
5.83	0.0003665		5.83	0.000562		5.83	-0.000347
5.83333	0.000367		5.83333	0.000557		5.83333	-0.00033
5.83667	0.0003635		5.83667	0.0005525		5.83667	-0.000329
5.84	0.0003705		5.84	0.0005535		5.84	-0.0003395
5.84333	0.000373		5.84333	0.000557		5.84333	-0.000344
5.84667	0.0003765		5.84667	0.0005625		5.84667	-0.0003455
5.85	0.000381		5.85	0.0005595		5.85	-0.000338
5.85333	0.000374		5.85333	0.000559		5.85333	-0.000332
5.85667	0.000378		5.85667	0.0005715		5.85667	-0.00033
5.86	0.000389		5.86	0.0005715		5.86	-0.000329
5.86333	0.000389		5.86333	0.000569		5.86333	-0.000333
5.86667	0.0003895		5.86667	0.00056		5.86667	-0.000339
5.87	0.0003915		5.87	0.000556		5.87	-0.000329
5.87333	0.0004		5.87333	0.00056		5.87333	-0.000331
5.87667	0.0004045		5.87667	0.0005595		5.87667	-0.0003415
5.88	0.0003975		5.88	0.000556		5.88	-0.000335
5.88333	0.0003965		5.88333	0.0005525		5.88333	-0.000335
5.88667	0.000399		5.88667	0.0005565		5.88667	-0.000341
5.89	0.000401		5.89	0.000553		5.89	-0.0003475
5.89333	0.000407		5.89333	0.0005535		5.89333	-0.0003515
5.89667	0.0004195		5.89667	0.0005585		5.89667	-0.000353
5.9	0.0004275		5.9	0.000549		5.9	-0.0003535
5.90333	0.0004275		5.90333	0.0005495		5.90333	-0.0003395
5.90667	0.000427		5.90667	0.0005585		5.90667	-0.000329
5.91	0.0004295		5.91	0.0005585		5.91	-0.0003295
5.91333	0.00043		5.91333	0.000555		5.91333	-0.0003395
5.91667	0.000429		5.91667	0.0005545		5.91667	-0.000352
5.92	0.0004275		5.92	0.000559		5.92	-0.0003455
5.92333	0.000422		5.92333	0.000562		5.92333	-0.000326
5.92667	0.000422		5.92667	0.000565		5.92667	-0.00032
5.93	0.000418		5.93	0.0005595		5.93	-0.000323
5.93333	0.000416		5.93333	0.000561		5.93333	-0.00033
5.93667	0.000426		5.93667	0.0005665		5.93667	-0.0003305
5.94	0.000436		5.94	0.000555		5.94	-0.0003355
5.94333	0.000439		5.94333	0.0005515		5.94333	-0.0003425
5.94667	0.0004275		5.94667	0.0005555		5.94667	-0.0003465
5.95	0.000417		5.95	0.0005655		5.95	-0.000349
5.95333	0.0004205		5.95333	0.000578		5.95333	-0.000344
5.95667	0.000424		5.95667	0.0005715		5.95667	-0.0003475
5.96	0.000427		5.96	0.000561		5.96	-0.000343
5.96333	0.0004245		5.96333	0.0005545		5.96333	-0.000333
5.96667	0.000414		5.96667	0.0005505		5.96667	-0.000333
5.97	0.0004115		5.97	0.000554		5.97	-0.000335
5.97333	0.000399		5.97333	0.00056		5.97333	-0.0003305
5.97667	0.000389		5.97667	0.0005645		5.97667	-0.000324
5.98	0.000389		5.98	0.000571		5.98	-0.0003275
5.98333	0.000391		5.98333	0.0005625		5.98333	-0.0003325
5.98667	0.0003945		5.98667	0.000554		5.98667	-0.000343
5.99	0.0003895		5.99	0.0005685		5.99	-0.00035
5.99333	0.000389		5.99333	0.000577		5.99333	-0.00034
5.99667	0.0003835		5.99667	0.0005745		5.99667	-0.0003305
6	0.0003735		6	0.0005715		6	-0.000336
6.00333	0.000378		6.00333	0.0005685		6.00333	-0.000349
6.00667	0.000382		6.00667	0.0005725		6.00667	-0.0003455
6.01	0.0003805		6.01	0.0005795		6.01	-0.0003375
6.01333	0.0003755		6.01333	0.000571		6.01333	-0.0003375
6.01667	0.0003655		6.01667	0.000563		6.01667	-0.0003415
6.02	0.0003565		6.02	0.000561		6.02	-0.00035
6.02333	0.0003475		6.02333	0.000557		6.02333	-0.0003565
6.02667	0.0003455		6.02667	0.000565		6.02667	-0.0003525
6.03	0.000343		6.03	0.0005705		6.03	-0.000344
6.03333	0.00034		6.03333	0.0005715		6.03333	-0.000342
6.03667	0.0003345		6.03667	0.0005755		6.03667	-0.0003465
6.04	0.000331		6.04	0.0005735		6.04	-0.000348
6.04333	0.000336		6.04333	0.000568		6.04333	-0.00035
6.04667	0.0003325		6.04667	0.000572		6.04667	-0.0003445
6.05	0.000314		6.05	0.000574		6.05	-0.0003435
6.05333	0.0003055		6.05333	0.000569		6.05333	-0.0003505
6.05667	0.000306		6.05667	0.0005765		6.05667	-0.000355
6.06	0.0003025		6.06	0.0005765		6.06	-0.000358
6.06333	0.000308		6.06333	0.0005645		6.06333	-0.000355
6.06667	0.000307		6.06667	0.000567		6.06667	-0.000355
6.07	0.0003095		6.07	0.000564		6.07	-0.000345
6.07333	0.0003185		6.07333	0.0005515		6.07333	-0.0003395
6.07667	0.000311		6.07667	0.000555		6.07667	-0.0003495
6.08	0.0002975		6.08	0.000557		6.08	-0.0003525
6.08333	0.0002895		6.08333	0.0005615		6.08333	-0.0003455
6.08667	0.000284		6.08667	0.0005725		6.08667	-0.000345
6.09	0.00029		6.09	0.0005705		6.09	-0.000348
6.09333	0.000296		6.09333	0.0005705		6.09333	-0.000345
6.09667	0.000298		6.09667	0.0005715		6.09667	-0.000341
6.1	0.000299		6.1	0.0005715		6.1	-0.000346
6.10333	0.0002905		6.10333	0.000567		6.10333	-0.0003475
6.10667	0.000284		6.10667	0.0005615		6.10667	-0.0003395
6.11	0.0002835		6.11	0.0005625		6.11	-0.000336
6.11333	0.0002825		6.11333	0.0005585		6.11333	-0.0003405
6.11667	0.000272		6.11667	0.0005455		6.11667	-0.0003395
6.12	0.000271		6.12	0.0005455		6.12	-0.000331
6.12333	0.0002805		6.12333	0.000562		6.12333	-0.0003305
6.12667	0.000287		6.12667	0.000573		6.12667	-0.000345
6.13	0.0002775		6.13	0.0005685		6.13	-0.0003465
6.13333	0.0002515		6.13333	0.00056		6.13333	-0.0003395
6.13667	0.0002465		6.13667	0.0005575		6.13667	-0.0003445
6.14	0.000257		6.14	0.0005625		6.14	-0.0003455
6.14333	0.0002625		6.14333	0.0005615		6.14333	-0.000352
6.14667	0.0002655		6.14667	0.0005585		6.14667	-0.0003515
6.15	0.0002595		6.15	0.0005605		6.15	-0.0003395
6.15333	0.0002475		6.15333	0.0005685		6.15333	-0.00034
6.15667	0.0002455		6.15667	0.0005805		6.15667	-0.0003455
6.16	0.000251		6.16	0.0005795		6.16	-0.00036
6.16333	0.000251		6.16333	0.000568		6.16333	-0.0003605
6.16667	0.0002495		6.16667	0.000561		6.16667	-0.000345
6.17	0.000242		6.17	0.0005725		6.17	-0.0003365
6.17333	0.0002395		6.17333	0.0005795		6.17333	-0.000337
6.17667	0.0002495		6.17667	0.0005745		6.17667	-0.0003495
6.18	0.0002575		6.18	0.000573		6.18	-0.0003615
6.18333	0.0002565		6.18333	0.0005705		6.18333	-0.000363
6.18667	0.000246		6.18667	0.0005695		6.18667	-0.000349
6.19	0.0002395		6.19	0.000562		6.19	-0.000346
6.19333	0.0002425		6.19333	0.000566		6.19333	-0.000355
6.19667	0.0002425		6.19667	0.0005655		6.19667	-0.0003585
6.2	0.0002435		6.2	0.000559		6.2	-0.0003495
6.20333	0.000243		6.20333	0.000572		6.20333	-0.000338
6.20667	0.000236		6.20667	0.000576		6.20667	-0.000344
6.21	0.0002305		6.21	0.000566		6.21	-0.0003505
6.21333	0.000235		6.21333	0.00056		6.21333	-0.000345
6.21667	0.0002395		6.21667	0.000556		6.21667	-0.0003385
6.22	0.0002355		6.22	0.000562		6.22	-0.0003395
6.22333	0.0002275		6.22333	0.0005705		6.22333	-0.000345
6.22667	0.0002245		6.22667	0.0005625		6.22667	-0.000351
6.23	0.0002285		6.23	0.000567		6.23	-0.0003555
6.23333	0.0002335		6.23333	0.000571		6.23333	-0.0003545
6.23667	0.000232		6.23667	0.000563		6.23667	-0.0003445
6.24	0.0002345		6.24	0.000566		6.24	-0.0003375
6.24333	0.000236		6.24333	0.000569		6.24333	-0.0003325
6.24667	0.000228		6.24667	0.0005725		6.24667	-0.000335
6.25	0.000221		6.25	0.0005785		6.25	-0.000347
6.25333	0.0002185		6.25333	0.0005775		6.25333	-0.0003485
6.25667	0.0002245		6.25667	0.000577		6.25667	-0.0003445
6.26	0.000221		6.26	0.000578		6.26	-0.000352
6.26333	0.0002185		6.26333	0.000566		6.26333	-0.0003545
6.26667	0.0002245		6.26667	0.00055		6.26667	-0.000344
6.27	0.00024		6.27	0.00055		6.27	-0.000328
6.27333	0.000249		6.27333	0.0005525		6.27333	-0.0003275
6.27667	0.0002365		6.27667	0.0005585		6.27667	-0.0003405
6.28	0.000234		6.28	0.000562		6.28	-0.000337
6.28333	0.0002405		6.28333	0.0005585		6.28333	-0.000327
6.28667	0.0002425		6.28667	0.000554		6.28667	-0.0003305
6.29	0.0002425		6.29	0.000559		6.29	-0.000336
6.29333	0.000242		6.29333	0.0005675		6.29333	-0.0003345
6.29667	0.0002425		6.29667	0.000573		6.29667	-0.000327
6.3	0.0002465		6.3	0.0005695		6.3	-0.0003315
6.30333	0.000251		6.30333	0.0005615		6.30333	-0.0003375
6.30667	0.000252		6.30667	0.0005635		6.30667	-0.00033
6.31	0.0002515		6.31	0.0005685		6.31	-0.0003275
6.31333	0.000252		6.31333	0.000565		6.31333	-0.00033
6.31667	0.0002465		6.31667	0.000561		6.31667	-0.000336
6.32	0.0002545		6.32	0.0005565		6.32	-0.000334
6.32333	0.0002635		6.32333	0.000558		6.32333	-0.0003335
6.32667	0.0002615		6.32667	0.000576		6.32667	-0.000339
6.33	0.000265		6.33	0.0005735		6.33	-0.0003355
6.33333	0.0002655		6.33333	0.000559		6.33333	-0.000324
6.33667	0.000265		6.33667	0.0005675		6.33667	-0.000327
6.34	0.0002675		6.34	0.000573		6.34	-0.000334
6.34333	0.0002695		6.34333	0.000568		6.34333	-0.000328
6.34667	0.0002715		6.34667	0.0005625		6.34667	-0.000334
6.35	0.000276		6.35	0.000568		6.35	-0.000337
6.35333	0.000283		6.35333	0.000577		6.35333	-0.000328
6.35667	0.000283		6.35667	0.0005845		6.35667	-0.0003225
6.36	0.000269		6.36	0.0005915		6.36	-0.000319
6.36333	0.0002645		6.36333	0.0005855		6.36333	-0.0003325
6.36667	0.0002735		6.36667	0.000588		6.36667	-0.000342
6.37	0.0002735		6.37	0.0005805		6.37	-0.0003365
6.37333	0.00027		6.37333	0.000568		6.37333	-0.0003385
6.37667	0.000269		6.37667	0.0005725		6.37667	-0.000345
6.38	0.000265		6.38	0.000575		6.38	-0.000352
6.38333	0.000266		6.38333	0.0005785		6.38333	-0.0003435
6.38667	0.000265		6.38667	0.0005815		6.38667	-0.0003365
6.39	0.0002585		6.39	0.000573		6.39	-0.000345
6.39333	0.0002555		6.39333	0.0005765		6.39333	-0.000356
6.39667	0.00026		6.39667	0.0005835		6.39667	-0.000352
6.4	0.0002515		6.4	0.0005785		6.4	-0.000342
6.40333	0.000238		6.40333	0.000577		6.40333	-0.0003295
6.40667	0.0002415		6.40667	0.000581		6.40667	-0.000318
6.41	0.0002535		6.41	0.000582		6.41	-0.0003265
6.41333	0.0002475		6.41333	0.0005765		6.41333	-0.00034
6.41667	0.000232		6.41667	0.0005795		6.41667	-0.0003475
6.42	0.000237		6.42	0.00059		6.42	-0.000354
6.42333	0.0002365		6.42333	0.000586		6.42333	-0.000353
6.42667	0.0002355		6.42667	0.000578		6.42667	-0.000345
6.43	0.000233		6.43	0.0005715		6.43	-0.0003465
6.43333	0.0002265		6.43333	0.0005645		6.43333	-0.00036
6.43667	0.000226		6.43667	0.0005685		6.43667	-0.0003595
6.44	0.0002235		6.44	0.0005805		6.44	-0.0003505
6.44333	0.0002215		6.44333	0.0005805		6.44333	-0.0003475
6.44667	0.000227		6.44667	0.000571		6.44667	-0.000346
6.45	0.000225		6.45	0.0005675		6.45	-0.000358
6.45333	0.0002165		6.45333	0.0005665		6.45333	-0.000364
6.45667	0.000211		6.45667	0.000564		6.45667	-0.0003665
6.46	0.000205		6.46	0.0005655		6.46	-0.0003505
6.46333	0.000199		6.46333	0.000583		6.46333	-0.000342
6.46667	0.000206		6.46667	0.000592		6.46667	-0.000364
6.47	0.0002105		6.47	0.000575		6.47	-0.000361
6.47333	0.0002125		6.47333	0.0005655		6.47333	-0.000351
6.47667	0.000205		6.47667	0.0005765		6.47667	-0.000358
6.48	0.0001955		6.48	0.000575		6.48	-0.0003585
6.48333	0.0001995		6.48333	0.000576		6.48333	-0.000352
6.48667	0.000196		6.48667	0.0005745		6.48667	-0.0003495
6.49	0.00019		6.49	0.000565		6.49	-0.000354
6.49333	0.0001905		6.49333	0.0005575		6.49333	-0.0003545
6.49667	0.0002		6.49667	0.0005535		6.49667	-0.0003645
6.5	0.0001975		6.5	0.0005605		6.5	-0.0003675
6.50333	0.0001855		6.50333	0.00057		6.50333	-0.0003545
6.50667	0.0001845		6.50667	0.0005665		6.50667	-0.000359
6.51	0.000186		6.51	0.0005505		6.51	-0.0003555
6.51333	0.000191		6.51333	0.000553		6.51333	-0.000348
6.51667	0.0001915		6.51667	0.0005585		6.51667	-0.0003465
6.52	0.000186		6.52	0.0005685		6.52	-0.000346
6.52333	0.0001825		6.52333	0.0005765		6.52333	-0.0003505
6.52667	0.000175		6.52667	0.00057		6.52667	-0.000355
6.53	0.0001685		6.53	0.000561		6.53	-0.0003495
6.53333	0.0001765		6.53333	0.000572		6.53333	-0.000352
6.53667	0.000184		6.53667	0.0005805		6.53667	-0.0003665
6.54	0.0001845		6.54	0.000573		6.54	-0.000373
6.54333	0.0001855		6.54333	0.0005755		6.54333	-0.0003745
6.54667	0.0001705		6.54667	0.0005705		6.54667	-0.000371
6.55	0.000165		6.55	0.0005735		6.55	-0.0003595
6.55333	0.0001795		6.55333	0.000577		6.55333	-0.0003535
6.55667	0.0001855		6.55667	0.000569		6.55667	-0.000357
6.56	0.0001825		6.56	0.000571		6.56	-0.0003645
6.56333	0.0001805		6.56333	0.000572		6.56333	-0.0003615
6.56667	0.0001775		6.56667	0.000572		6.56667	-0.000353
6.57	0.0001745		6.57	0.000568		6.57	-0.000357
6.57333	0.0001775		6.57333	0.000565		6.57333	-0.000365
6.57667	0.000172		6.57667	0.0005605		6.57667	-0.000367
6.58	0.0001635		6.58	0.000561		6.58	-0.000351
6.58333	0.000166		6.58333	0.000571		6.58333	-0.0003445
6.58667	0.000168		6.58667	0.000564		6.58667	-0.0003565
6.59	0.000164		6.59	0.000561		6.59	-0.000376
6.59333	0.000161		6.59333	0.000569		6.59333	-0.0003815
6.59667	0.0001525		6.59667	0.000575		6.59667	-0.000372
6.6	0.0001505		6.6	0.000583		6.6	-0.000368
6.60333	0.000165		6.60333	0.00059		6.60333	-0.000358
6.60667	0.0001725		6.60667	0.0005895		6.60667	-0.0003525
6.61	0.0001715		6.61	0.000587		6.61	-0.0003585
6.61333	0.0001585		6.61333	0.0005875		6.61333	-0.0003715
6.61667	0.000146		6.61667	0.0005745		6.61667	-0.000376
6.62	0.0001495		6.62	0.000561		6.62	-0.0003645
6.62333	0.000158		6.62333	0.0005665		6.62333	-0.0003565
6.62667	0.0001625		6.62667	0.0005645		6.62667	-0.0003525
6.63	0.000163		6.63	0.0005585		6.63	-0.000345
6.63333	0.000162		6.63333	0.00056		6.63333	-0.000349
6.63667	0.000156		6.63667	0.000574		6.63667	-0.000355
6.64	0.0001565		6.64	0.0005815		6.64	-0.0003595
6.64333	0.0001575		6.64333	0.000575		6.64333	-0.0003545
6.64667	0.0001545		6.64667	0.0005765		6.64667	-0.0003445
6.65	0.0001535		6.65	0.0005785		6.65	-0.0003545
6.65333	0.000151		6.65333	0.000582		6.65333	-0.000364
6.65667	0.0001485		6.65667	0.000581		6.65667	-0.0003765
6.66	0.0001495		6.66	0.000583		6.66	-0.00039
[truncated: 7,302 more rows]

## Sheet: Fig 16c
Time (min)	DiPure/3'OMe, crude		Time (min)	DiPure/3'OMe, after HPLC purifiation		Time (min)	DiPure/3'OMe, after photo-irradiation
0	0		0	0		0	0
0.00333	1.05e-05		0.00333	1.85e-05		0.00333	1.65e-05
0.00667	1.5e-05		0.00667	2.55e-05		0.00667	2.9e-05
0.01	1.75e-05		0.01	2.85e-05		0.01	1.4e-05
0.01333	1.15e-05		0.01333	3.25e-05		0.01333	1.25e-05
0.01667	3e-06		0.01667	1.95e-05		0.01667	3e-05
0.02	1e-05		0.02	5e-06		0.02	3.5e-05
0.02333	4.5e-06		0.02333	1.1e-05		0.02333	3.5e-05
0.02667	-3e-06		0.02667	7e-06		0.02667	3.95e-05
0.03	1e-05		0.03	2.5e-06		0.03	5.1e-05
0.03333	1.9e-05		0.03333	8e-06		0.03333	5.25e-05
0.03667	2e-05		0.03667	1.2e-05		0.03667	5.8e-05
0.04	1.65e-05		0.04	2e-05		0.04	6.6e-05
0.04333	1.85e-05		0.04333	2.85e-05		0.04333	4.75e-05
0.04667	1.75e-05		0.04667	3.15e-05		0.04667	3.5e-05
0.05	4.5e-06		0.05	2.45e-05		0.05	2.65e-05
0.05333	-7e-06		0.05333	1.9e-05		0.05333	2.4e-05
0.05667	9e-06		0.05667	2.1e-05		0.05667	2.85e-05
0.06	2.25e-05		0.06	2.4e-05		0.06	3.5e-05
0.06333	1.8e-05		0.06333	3.15e-05		0.06333	4.3e-05
0.06667	2.2e-05		0.06667	1.95e-05		0.06667	5.55e-05
0.07	2.35e-05		0.07	1.65e-05		0.07	6.45e-05
0.07333	2.4e-05		0.07333	1.6e-05		0.07333	4.75e-05
0.07667	2.85e-05		0.07667	6e-06		0.07667	2.75e-05
0.08	2.35e-05		0.08	1.95e-05		0.08	2.65e-05
0.08333	1.55e-05		0.08333	2.6e-05		0.08333	3.5e-05
0.08667	1.45e-05		0.08667	1.2e-05		0.08667	3.7e-05
0.09	1.05e-05		0.09	1.7e-05		0.09	3.4e-05
0.09333	1.15e-05		0.09333	3.15e-05		0.09333	2.95e-05
0.09667	2.65e-05		0.09667	3.35e-05		0.09667	3.7e-05
0.1	3.15e-05		0.1	2.7e-05		0.1	5.3e-05
0.10333	2.7e-05		0.10333	1.95e-05		0.10333	4.65e-05
0.10667	3.35e-05		0.10667	1.65e-05		0.10667	3.9e-05
0.11	3.55e-05		0.11	2.45e-05		0.11	4.7e-05
0.11333	2.85e-05		0.11333	2.95e-05		0.11333	5.1e-05
0.11667	2.35e-05		0.11667	2.25e-05		0.11667	4.4e-05
0.12	1.85e-05		0.12	2.2e-05		0.12	3.95e-05
0.12333	1.15e-05		0.12333	2.7e-05		0.12333	2.95e-05
0.12667	1.5e-05		0.12667	2.2e-05		0.12667	1.7e-05
0.13	2.25e-05		0.13	2.35e-05		0.13	2.65e-05
0.13333	2.4e-05		0.13333	1.85e-05		0.13333	3.85e-05
0.13667	3.3e-05		0.13667	5.5e-06		0.13667	3.85e-05
0.14	3.3e-05		0.14	1.5e-05		0.14	3.7e-05
0.14333	2.8e-05		0.14333	1.85e-05		0.14333	2.9e-05
0.14667	2.75e-05		0.14667	1.65e-05		0.14667	2.65e-05
0.15	1.95e-05		0.15	1.95e-05		0.15	3.35e-05
0.15333	7.5e-06		0.15333	2.05e-05		0.15333	3e-05
0.15667	1.5e-06		0.15667	2.5e-05		0.15667	2.8e-05
0.16	1.55e-05		0.16	2.65e-05		0.16	3.15e-05
0.16333	3.35e-05		0.16333	1.8e-05		0.16333	3.2e-05
0.16667	3.35e-05		0.16667	8e-06		0.16667	3.9e-05
0.17	2.25e-05		0.17	1.15e-05		0.17	3.9e-05
0.17333	1.85e-05		0.17333	1.45e-05		0.17333	3.9e-05
0.17667	1.3e-05		0.17667	1.25e-05		0.17667	3.55e-05
0.18	6.5e-06		0.18	1.85e-05		0.18	3.05e-05
0.18333	1.3e-05		0.18333	2.45e-05		0.18333	3.35e-05
0.18667	2.4e-05		0.18667	3.4e-05		0.18667	3.55e-05
0.19	2.75e-05		0.19	3.25e-05		0.19	4.25e-05
0.19333	2e-05		0.19333	1.4e-05		0.19333	4.65e-05
0.19667	1.15e-05		0.19667	8.5e-06		0.19667	4.85e-05
0.2	1.4e-05		0.2	1.7e-05		0.2	5.25e-05
0.20333	2.2e-05		0.20333	1.5e-05		0.20333	5.1e-05
0.20667	2.35e-05		0.20667	1.15e-05		0.20667	5.2e-05
0.21	1.65e-05		0.21	1.4e-05		0.21	5.3e-05
0.21333	1.8e-05		0.21333	2e-05		0.21333	3.6e-05
0.21667	2.5e-05		0.21667	3.05e-05		0.21667	3.1e-05
0.22	2.7e-05		0.22	3.5e-05		0.22	3.15e-05
0.22333	2.6e-05		0.22333	2.85e-05		0.22333	2.85e-05
0.22667	2.9e-05		0.22667	2.15e-05		0.22667	3.55e-05
0.23	3.7e-05		0.23	2.1e-05		0.23	4e-05
0.23333	2.55e-05		0.23333	1.45e-05		0.23333	4.75e-05
0.23667	1.3e-05		0.23667	1.1e-05		0.23667	4.25e-05
0.24	2.6e-05		0.24	2.3e-05		0.24	3.75e-05
0.24333	3.8e-05		0.24333	2.6e-05		0.24333	4.1e-05
0.24667	2.95e-05		0.24667	1.85e-05		0.24667	4.4e-05
0.25	1.65e-05		0.25	1.9e-05		0.25	4.35e-05
0.25333	1.25e-05		0.25333	2.8e-05		0.25333	3.75e-05
0.25667	9.5e-06		0.25667	2.85e-05		0.25667	3.8e-05
0.26	1.1e-05		0.26	3.25e-05		0.26	4.65e-05
0.26333	2.65e-05		0.26333	3.15e-05		0.26333	5.2e-05
0.26667	3.55e-05		0.26667	3.35e-05		0.26667	4.05e-05
0.27	3e-05		0.27	4.05e-05		0.27	2.85e-05
0.27333	3.75e-05		0.27333	4e-05		0.27333	3.55e-05
0.27667	3.95e-05		0.27667	3.3e-05		0.27667	4.9e-05
0.28	2.7e-05		0.28	2.45e-05		0.28	4.5e-05
0.28333	2.55e-05		0.28333	3.2e-05		0.28333	4.3e-05
0.28667	3.35e-05		0.28667	3.35e-05		0.28667	4.25e-05
0.29	4e-05		0.29	3.2e-05		0.29	3.6e-05
0.29333	3.6e-05		0.29333	3.65e-05		0.29333	3.6e-05
0.29667	3.5e-05		0.29667	3e-05		0.29667	2.9e-05
0.3	3.1e-05		0.3	2.75e-05		0.3	2.1e-05
0.30333	3.4e-05		0.30333	3.5e-05		0.30333	2.55e-05
0.30667	4.65e-05		0.30667	3e-05		0.30667	3.5e-05
0.31	4.85e-05		0.31	3e-05		0.31	4.85e-05
0.31333	4.6e-05		0.31333	3.65e-05		0.31333	4.8e-05
0.31667	3.5e-05		0.31667	3.35e-05		0.31667	3.5e-05
0.32	2.8e-05		0.32	3.75e-05		0.32	2.2e-05
0.32333	2.65e-05		0.32333	4.3e-05		0.32333	2.1e-05
0.32667	3.35e-05		0.32667	3.95e-05		0.32667	3.6e-05
0.33	4.4e-05		0.33	3.55e-05		0.33	3.35e-05
0.33333	3.75e-05		0.33333	3.55e-05		0.33333	2.2e-05
0.33667	3.05e-05		0.33667	3.8e-05		0.33667	2.1e-05
0.34	3.8e-05		0.34	3.05e-05		0.34	3.15e-05
0.34333	3.9e-05		0.34333	3.15e-05		0.34333	4.75e-05
0.34667	3.05e-05		0.34667	3.75e-05		0.34667	4.5e-05
0.35	2.75e-05		0.35	4.1e-05		0.35	3.9e-05
0.35333	2.15e-05		0.35333	4.4e-05		0.35333	4.3e-05
0.35667	2.15e-05		0.35667	2.8e-05		0.35667	3.3e-05
0.36	2.4e-05		0.36	2.45e-05		0.36	2.85e-05
0.36333	3.25e-05		0.36333	3.1e-05		0.36333	3.75e-05
0.36667	4.4e-05		0.36667	3e-05		0.36667	4.1e-05
0.37	4.45e-05		0.37	3.05e-05		0.37	3.85e-05
0.37333	4e-05		0.37333	2.95e-05		0.37333	4.15e-05
0.37667	3.05e-05		0.37667	2.6e-05		0.37667	3.85e-05
0.38	2.4e-05		0.38	1.95e-05		0.38	3.25e-05
0.38333	2.65e-05		0.38333	2.1e-05		0.38333	3.2e-05
0.38667	2.9e-05		0.38667	4.3e-05		0.38667	2.75e-05
0.39	2.65e-05		0.39	4.6e-05		0.39	2.15e-05
0.39333	2.75e-05		0.39333	2.95e-05		0.39333	1.95e-05
0.39667	2e-05		0.39667	2.8e-05		0.39667	2.3e-05
0.4	1.9e-05		0.4	3.25e-05		0.4	2.55e-05
0.40333	3.4e-05		0.40333	2.8e-05		0.40333	3.7e-05
0.40667	3.75e-05		0.40667	1.6e-05		0.40667	3.6e-05
0.41	2.45e-05		0.41	1.6e-05		0.41	1.3e-05
0.41333	8.5e-06		0.41333	2e-05		0.41333	1.3e-05
0.41667	1.2e-05		0.41667	1.55e-05		0.41667	2.25e-05
0.42	3.2e-05		0.42	7e-06		0.42	3e-05
0.42333	4.25e-05		0.42333	1.65e-05		0.42333	4e-05
0.42667	3.1e-05		0.42667	2.8e-05		0.42667	3.95e-05
0.43	2.2e-05		0.43	2.85e-05		0.43	3.4e-05
0.43333	2.05e-05		0.43333	2.2e-05		0.43333	2.7e-05
0.43667	2.35e-05		0.43667	1.8e-05		0.43667	2.9e-05
0.44	2.95e-05		0.44	2.35e-05		0.44	3.45e-05
0.44333	3.3e-05		0.44333	2.5e-05		0.44333	3.3e-05
0.44667	2.7e-05		0.44667	3e-05		0.44667	3e-05
0.45	1.4e-05		0.45	3.55e-05		0.45	2.9e-05
0.45333	1.5e-05		0.45333	2.85e-05		0.45333	2.1e-05
0.45667	1.4e-05		0.45667	2.1e-05		0.45667	1.35e-05
0.46	1.4e-05		0.46	1.4e-05		0.46	2.05e-05
0.46333	2.8e-05		0.46333	1.9e-05		0.46333	3e-05
0.46667	2.75e-05		0.46667	3.8e-05		0.46667	3.3e-05
0.47	1.2e-05		0.47	4.15e-05		0.47	2.75e-05
0.47333	1.9e-05		0.47333	3.5e-05		0.47333	1.75e-05
0.47667	2.9e-05		0.47667	1.95e-05		0.47667	1.7e-05
0.48	2.55e-05		0.48	1.85e-05		0.48	2.4e-05
0.48333	2.1e-05		0.48333	3.45e-05		0.48333	2.8e-05
0.48667	1.4e-05		0.48667	2.3e-05		0.48667	2.75e-05
0.49	1.2e-05		0.49	1.6e-05		0.49	2.6e-05
0.49333	1.85e-05		0.49333	2e-05		0.49333	2.2e-05
0.49667	2.1e-05		0.49667	1.6e-05		0.49667	2.2e-05
0.5	2.95e-05		0.5	2.85e-05		0.5	2.45e-05
0.50333	2.9e-05		0.50333	4e-05		0.50333	1.25e-05
0.50667	2.35e-05		0.50667	4.1e-05		0.50667	4e-06
0.51	2.7e-05		0.51	2.6e-05		0.51	1.5e-05
0.51333	2.55e-05		0.51333	1.45e-05		0.51333	2.6e-05
0.51667	3.1e-05		0.51667	2.25e-05		0.51667	1.65e-05
0.52	2.95e-05		0.52	1.55e-05		0.52	4e-06
0.52333	1.95e-05		0.52333	-1e-06		0.52333	1.65e-05
0.52667	2.3e-05		0.52667	9e-06		0.52667	3.45e-05
0.53	2.4e-05		0.53	2.6e-05		0.53	3.05e-05
0.53333	1.85e-05		0.53333	1.6e-05		0.53333	2.55e-05
0.53667	2.3e-05		0.53667	1.9e-05		0.53667	2.6e-05
0.54	2.3e-05		0.54	3e-05		0.54	2.8e-05
0.54333	2.7e-05		0.54333	1.8e-05		0.54333	3.65e-05
0.54667	2.7e-05		0.54667	1.4e-05		0.54667	3.8e-05
0.55	1.25e-05		0.55	2.7e-05		0.55	3.2e-05
0.55333	1.3e-05		0.55333	3.7e-05		0.55333	2.5e-05
0.55667	2.15e-05		0.55667	3.55e-05		0.55667	1.15e-05
0.56	2.1e-05		0.56	3.3e-05		0.56	7e-06
0.56333	1.8e-05		0.56333	4.05e-05		0.56333	1.1e-05
0.56667	2.4e-05		0.56667	3.55e-05		0.56667	2.5e-05
0.57	2.8e-05		0.57	2.4e-05		0.57	2.55e-05
0.57333	1.75e-05		0.57333	3.1e-05		0.57333	1.05e-05
0.57667	1.45e-05		0.57667	4.1e-05		0.57667	1.05e-05
0.58	2.15e-05		0.58	4.05e-05		0.58	1e-05
0.58333	2e-05		0.58333	4e-05		0.58333	4e-06
0.58667	1.5e-05		0.58667	3.5e-05		0.58667	4.5e-06
0.59	1.8e-05		0.59	3.3e-05		0.59	1.15e-05
0.59333	2.4e-05		0.59333	2.85e-05		0.59333	1.55e-05
0.59667	2.1e-05		0.59667	1.1e-05		0.59667	2.1e-05
0.6	2.25e-05		0.6	1.3e-05		0.6	2.6e-05
0.60333	1.65e-05		0.60333	2.35e-05		0.60333	2.75e-05
0.60667	3e-06		0.60667	3.25e-05		0.60667	1.65e-05
0.61	-1.5e-06		0.61	3.8e-05		0.61	1.2e-05
0.61333	1e-05		0.61333	3.05e-05		0.61333	1.7e-05
0.61667	1.6e-05		0.61667	3.35e-05		0.61667	1.6e-05
0.62	1.4e-05		0.62	4.35e-05		0.62	1.3e-05
0.62333	1.95e-05		0.62333	3.6e-05		0.62333	5e-06
0.62667	1.3e-05		0.62667	2.35e-05		0.62667	7.5e-06
0.63	4e-06		0.63	2.8e-05		0.63	1.85e-05
0.63333	9e-06		0.63333	2.55e-05		0.63333	1.75e-05
0.63667	2.75e-05		0.63667	2.05e-05		0.63667	6e-06
0.64	3.2e-05		0.64	3.15e-05		0.64	6e-06
0.64333	3e-05		0.64333	2.3e-05		0.64333	1.25e-05
0.64667	2.65e-05		0.64667	1.3e-05		0.64667	2e-05
0.65	2e-05		0.65	2.1e-05		0.65	2.5e-05
0.65333	1.6e-05		0.65333	1.9e-05		0.65333	1.7e-05
0.65667	2e-05		0.65667	1.6e-05		0.65667	1.35e-05
0.66	2.95e-05		0.66	2.75e-05		0.66	1.35e-05
0.66333	2.1e-05		0.66333	4.25e-05		0.66333	1.95e-05
0.66667	1.35e-05		0.66667	4.2e-05		0.66667	2e-05
0.67	1.9e-05		0.67	3e-05		0.67	5e-06
0.67333	2.3e-05		0.67333	3.05e-05		0.67333	4e-06
0.67667	3.2e-05		0.67667	3.5e-05		0.67667	9e-06
0.68	4.45e-05		0.68	2.75e-05		0.68	5e-06
0.68333	3.2e-05		0.68333	1.6e-05		0.68333	-5e-07
0.68667	1.9e-05		0.68667	1.75e-05		0.68667	-2e-06
0.69	2.55e-05		0.69	2.4e-05		0.69	6e-06
0.69333	2.3e-05		0.69333	2.95e-05		0.69333	1.05e-05
0.69667	1.7e-05		0.69667	3.45e-05		0.69667	5e-07
0.7	2.45e-05		0.7	3.7e-05		0.7	0
0.70333	1.8e-05		0.70333	3.2e-05		0.70333	3.5e-06
0.70667	1.75e-05		0.70667	3.3e-05		0.70667	4.5e-06
0.71	2.05e-05		0.71	3.95e-05		0.71	6.5e-06
0.71333	2e-05		0.71333	2.9e-05		0.71333	-2.5e-06
0.71667	2.65e-05		0.71667	2.75e-05		0.71667	-4e-06
0.72	2.5e-05		0.72	3.2e-05		0.72	1.5e-06
0.72333	2.7e-05		0.72333	3.5e-05		0.72333	-2.5e-06
0.72667	2.45e-05		0.72667	2.55e-05		0.72667	-7e-06
0.73	2.55e-05		0.73	1.95e-05		0.73	-6.5e-06
0.73333	2.75e-05		0.73333	3.2e-05		0.73333	1.5e-06
0.73667	1.8e-05		0.73667	3.8e-05		0.73667	2e-06
0.74	1.6e-05		0.74	3.8e-05		0.74	-4e-06
0.74333	2e-05		0.74333	2e-05		0.74333	1.5e-06
0.74667	1.55e-05		0.74667	-4.5e-06		0.74667	3e-06
0.75	1.15e-05		0.75	5.5e-06		0.75	7e-06
0.75333	1.05e-05		0.75333	1.2e-05		0.75333	8.5e-06
0.75667	1.85e-05		0.75667	1.1e-05		0.75667	6e-06
0.76	1.9e-05		0.76	2.05e-05		0.76	1.35e-05
0.76333	1.05e-05		0.76333	1.45e-05		0.76333	7.5e-06
0.76667	1e-05		0.76667	1.6e-05		0.76667	-3.5e-06
0.77	1.45e-05		0.77	2.9e-05		0.77	-1.05e-05
0.77333	2.25e-05		0.77333	2.75e-05		0.77333	-2.5e-06
0.77667	2.6e-05		0.77667	2.55e-05		0.77667	6.5e-06
0.78	1.85e-05		0.78	3.5e-05		0.78	6e-06
0.78333	8e-06		0.78333	2.75e-05		0.78333	4.5e-06
0.78667	1.4e-05		0.78667	1.65e-05		0.78667	-1.1e-05
0.79	1.65e-05		0.79	1.8e-05		0.79	-1.45e-05
0.79333	3.5e-06		0.79333	2.05e-05		0.79333	-1.7e-05
0.79667	2.5e-06		0.79667	2.45e-05		0.79667	-1.35e-05
0.8	7.5e-06		0.8	2.45e-05		0.8	-5e-07
0.80333	3.5e-06		0.80333	3e-05		0.80333	-2.5e-06
0.80667	-5e-07		0.80667	3.15e-05		0.80667	-7.5e-06
0.81	3.5e-06		0.81	1.9e-05		0.81	-5e-06
0.81333	1.3e-05		0.81333	2.25e-05		0.81333	-1.35e-05
0.81667	2.8e-05		0.81667	4.2e-05		0.81667	-1.55e-05
0.82	3.45e-05		0.82	3.55e-05		0.82	-5e-06
0.82333	2.75e-05		0.82333	1.95e-05		0.82333	-1.2e-05
0.82667	2.45e-05		0.82667	2.8e-05		0.82667	-2.5e-05
0.83	2.9e-05		0.83	3.25e-05		0.83	-2.15e-05
0.83333	3.1e-05		0.83333	2.4e-05		0.83333	-4e-06
0.83667	2.6e-05		0.83667	1.75e-05		0.83667	-2.5e-06
0.84	2.3e-05		0.84	1.95e-05		0.84	-9e-06
0.84333	1.4e-05		0.84333	1.6e-05		0.84333	-8.5e-06
0.84667	4e-06		0.84667	1.9e-05		0.84667	-2.2e-05
0.85	4e-06		0.85	3.2e-05		0.85	-1.55e-05
0.85333	5e-07		0.85333	3.4e-05		0.85333	4.5e-06
0.85667	0		0.85667	3.65e-05		0.85667	5e-07
0.86	7e-06		0.86	2.8e-05		0.86	-5e-07
0.86333	1.6e-05		0.86333	2.15e-05		0.86333	1e-06
0.86667	1.95e-05		0.86667	3.35e-05		0.86667	3e-06
0.87	1.6e-05		0.87	3.3e-05		0.87	2.5e-06
0.87333	2.25e-05		0.87333	2.45e-05		0.87333	-5e-06
0.87667	2.75e-05		0.87667	2.95e-05		0.87667	-2e-06
0.88	2.65e-05		0.88	3.65e-05		0.88	1.25e-05
0.88333	1.35e-05		0.88333	3.2e-05		0.88333	7e-06
0.88667	4.5e-06		0.88667	2.05e-05		0.88667	-9e-06
0.89	-5e-06		0.89	1.7e-05		0.89	-7e-06
0.89333	-1e-05		0.89333	1.55e-05		0.89333	-3.5e-06
0.89667	4e-06		0.89667	1.55e-05		0.89667	-1.5e-05
0.9	8e-06		0.9	2.45e-05		0.9	-2.1e-05
0.90333	1.5e-05		0.90333	2.45e-05		0.90333	-2.35e-05
0.90667	1.95e-05		0.90667	8.5e-06		0.90667	-2.75e-05
0.91	1.4e-05		0.91	1.2e-05		0.91	-2.45e-05
0.91333	1.15e-05		0.91333	2.4e-05		0.91333	-3.05e-05
0.91667	2.15e-05		0.91667	2.9e-05		0.91667	-2.7e-05
0.92	2.6e-05		0.92	3.3e-05		0.92	-1.2e-05
0.92333	2.05e-05		0.92333	3.6e-05		0.92333	-9.5e-06
0.92667	2.1e-05		0.92667	3.55e-05		0.92667	-1.9e-05
0.93	2.3e-05		0.93	1.75e-05		0.93	-2.45e-05
0.93333	2.45e-05		0.93333	2e-05		0.93333	-2.35e-05
0.93667	1.45e-05		0.93667	3.75e-05		0.93667	-1.95e-05
0.94	1.8e-05		0.94	2.65e-05		0.94	-2.2e-05
0.94333	1.9e-05		0.94333	1.85e-05		0.94333	-2.6e-05
0.94667	1.25e-05		0.94667	1.95e-05		0.94667	-1.95e-05
0.95	1.9e-05		0.95	1.4e-05		0.95	-1.6e-05
0.95333	1.55e-05		0.95333	9e-06		0.95333	-1.75e-05
0.95667	1.7e-05		0.95667	1.45e-05		0.95667	-1.65e-05
0.96	1e-05		0.96	1.95e-05		0.96	-2e-05
0.96333	-1.5e-06		0.96333	1.8e-05		0.96333	-2.25e-05
0.96667	8e-06		0.96667	2.2e-05		0.96667	-1.8e-05
0.97	2.25e-05		0.97	2.9e-05		0.97	-6e-06
0.97333	2.1e-05		0.97333	3.2e-05		0.97333	-8e-06
0.97667	1.5e-05		0.97667	2.6e-05		0.97667	-2.15e-05
0.98	1.75e-05		0.98	3e-05		0.98	-1.7e-05
0.98333	1.4e-05		0.98333	2.55e-05		0.98333	-1.95e-05
0.98667	4e-06		0.98667	2e-05		0.98667	-3.4e-05
0.99	5e-06		0.99	2.45e-05		0.99	-3.45e-05
0.99333	1.5e-05		0.99333	3.35e-05		0.99333	-3.55e-05
0.99667	2.05e-05		0.99667	3.65e-05		0.99667	-3.3e-05
1	2.15e-05		1	2.8e-05		1	-1.9e-05
1.00333	1.55e-05		1.00333	2e-05		1.00333	-1.95e-05
1.00667	8.5e-06		1.00667	1.8e-05		1.00667	-3.05e-05
1.01	1.9e-05		1.01	2.45e-05		1.01	-3.3e-05
1.01333	2.7e-05		1.01333	2.25e-05		1.01333	-2.25e-05
1.01667	1.95e-05		1.01667	2.2e-05		1.01667	-1.65e-05
1.02	1.45e-05		1.02	2.45e-05		1.02	-3.3e-05
1.02333	2.05e-05		1.02333	2.4e-05		1.02333	-4.3e-05
1.02667	2.65e-05		1.02667	2.65e-05		1.02667	-2.55e-05
1.03	2.55e-05		1.03	2.45e-05		1.03	-2.1e-05
1.03333	1.7e-05		1.03333	2.05e-05		1.03333	-3.2e-05
1.03667	1.65e-05		1.03667	2.15e-05		1.03667	-3.1e-05
1.04	1.8e-05		1.04	2.95e-05		1.04	-2.85e-05
1.04333	7.5e-06		1.04333	2.65e-05		1.04333	-4e-05
1.04667	4e-06		1.04667	1.85e-05		1.04667	-4.95e-05
1.05	5e-07		1.05	1.95e-05		1.05	-3.85e-05
1.05333	5e-07		1.05333	2.6e-05		1.05333	-1.85e-05
1.05667	1.65e-05		1.05667	3.3e-05		1.05667	-2.05e-05
1.06	2.55e-05		1.06	3.6e-05		1.06	-2.4e-05
1.06333	2.75e-05		1.06333	3.35e-05		1.06333	-2.9e-05
1.06667	2.65e-05		1.06667	2.6e-05		1.06667	-3.65e-05
1.07	1.85e-05		1.07	1.8e-05		1.07	-2.85e-05
1.07333	6.5e-06		1.07333	2.1e-05		1.07333	-2.65e-05
1.07667	4e-06		1.07667	2.7e-05		1.07667	-3.2e-05
1.08	1.15e-05		1.08	2.75e-05		1.08	-3.7e-05
1.08333	4.5e-06		1.08333	3.3e-05		1.08333	-4.85e-05
1.08667	3e-06		1.08667	2.8e-05		1.08667	-4.65e-05
1.09	1.8e-05		1.09	1.8e-05		1.09	-4e-05
1.09333	2.6e-05		1.09333	1.7e-05		1.09333	-5.15e-05
1.09667	1.85e-05		1.09667	2e-05		1.09667	-4.4e-05
1.1	1.5e-05		1.1	1.4e-05		1.1	-2.75e-05
1.10333	2e-05		1.10333	1.05e-05		1.10333	-3.6e-05
1.10667	1.8e-05		1.10667	2.65e-05		1.10667	-3.85e-05
1.11	2.4e-05		1.11	3.5e-05		1.11	-3.3e-05
1.11333	1.85e-05		1.11333	2.15e-05		1.11333	-3.45e-05
1.11667	7.5e-06		1.11667	1.25e-05		1.11667	-3.55e-05
1.12	1.1e-05		1.12	9e-06		1.12	-3.75e-05
1.12333	5e-06		1.12333	7e-06		1.12333	-4.05e-05
1.12667	6.5e-06		1.12667	7e-06		1.12667	-3.5e-05
1.13	1.1e-05		1.13	1.5e-06		1.13	-3.2e-05
1.13333	7e-06		1.13333	1.4e-05		1.13333	-3.8e-05
1.13667	7.5e-06		1.13667	4e-05		1.13667	-3.65e-05
1.14	1.4e-05		1.14	3.3e-05		1.14	-3.85e-05
1.14333	6e-06		1.14333	1.8e-05		1.14333	-4.5e-05
1.14667	-4e-06		1.14667	2.45e-05		1.14667	-5.4e-05
1.15	9.5e-06		1.15	3e-05		1.15	-5.65e-05
1.15333	2.55e-05		1.15333	1.9e-05		1.15333	-4.25e-05
1.15667	2.6e-05		1.15667	1.3e-05		1.15667	-3.75e-05
1.16	1.65e-05		1.16	1.7e-05		1.16	-3.95e-05
1.16333	1.4e-05		1.16333	2.4e-05		1.16333	-4.2e-05
1.16667	1.2e-05		1.16667	2.9e-05		1.16667	-5.6e-05
1.17	1.4e-05		1.17	2.85e-05		1.17	-5.35e-05
1.17333	2.15e-05		1.17333	2.7e-05		1.17333	-3.75e-05
1.17667	2.3e-05		1.17667	2.55e-05		1.17667	-4.15e-05
1.18	2.4e-05		1.18	2.3e-05		1.18	-4.65e-05
1.18333	2.45e-05		1.18333	1.75e-05		1.18333	-5.4e-05
1.18667	2.2e-05		1.18667	1.35e-05		1.18667	-7e-05
1.19	2.75e-05		1.19	8.5e-06		1.19	-6.5e-05
1.19333	1.7e-05		1.19333	1.6e-05		1.19333	-4.85e-05
1.19667	1e-05		1.19667	2.7e-05		1.19667	-4.2e-05
1.2	1.9e-05		1.2	2.15e-05		1.2	-4.1e-05
1.20333	2.7e-05		1.20333	1.7e-05		1.20333	-3.85e-05
1.20667	2.95e-05		1.20667	2e-05		1.20667	-3.3e-05
1.21	1.55e-05		1.21	1.55e-05		1.21	-3.4e-05
1.21333	1e-05		1.21333	8.5e-06		1.21333	-4.55e-05
1.21667	9.5e-06		1.21667	1.05e-05		1.21667	-4.45e-05
1.22	1.05e-05		1.22	1.6e-05		1.22	-3.95e-05
1.22333	1.6e-05		1.22333	1.85e-05		1.22333	-4.65e-05
1.22667	1.5e-05		1.22667	1.8e-05		1.22667	-4.45e-05
1.23	2e-05		1.23	2.05e-05		1.23	-4.65e-05
1.23333	2.2e-05		1.23333	2.05e-05		1.23333	-5.95e-05
1.23667	1.1e-05		1.23667	1.25e-05		1.23667	-5.85e-05
1.24	1.15e-05		1.24	1.25e-05		1.24	-4.45e-05
1.24333	1.45e-05		1.24333	2.6e-05		1.24333	-5.05e-05
1.24667	4.5e-06		1.24667	2.2e-05		1.24667	-5.75e-05
1.25	1e-05		1.25	7e-06		1.25	-5.65e-05
1.25333	1.9e-05		1.25333	1.35e-05		1.25333	-6.1e-05
1.25667	4.5e-06		1.25667	1.8e-05		1.25667	-5.35e-05
1.26	-3.5e-06		1.26	2.15e-05		1.26	-5.4e-05
1.26333	5e-06		1.26333	2e-05		1.26333	-5.45e-05
1.26667	1.4e-05		1.26667	2.9e-05		1.26667	-3.5e-05
1.27	1.9e-05		1.27	3.25e-05		1.27	-4.2e-05
1.27333	1.4e-05		1.27333	2.2e-05		1.27333	-5.75e-05
1.27667	-1e-06		1.27667	2.05e-05		1.27667	-5.65e-05
1.28	-7e-06		1.28	2.1e-05		1.28	-6.25e-05
1.28333	5e-06		1.28333	1.6e-05		1.28333	-6.9e-05
1.28667	1.35e-05		1.28667	1.25e-05		1.28667	-5.95e-05
1.29	1.55e-05		1.29	1.25e-05		1.29	-5.25e-05
1.29333	1.75e-05		1.29333	1.4e-05		1.29333	-5.65e-05
1.29667	1.6e-05		1.29667	1.55e-05		1.29667	-5.2e-05
1.3	1.5e-05		1.3	1.55e-05		1.3	-4.85e-05
1.30333	1.85e-05		1.30333	1.45e-05		1.30333	-4.7e-05
1.30667	1.3e-05		1.30667	8e-06		1.30667	-4.25e-05
1.31	1.15e-05		1.31	6.5e-06		1.31	-4.4e-05
1.31333	2.2e-05		1.31333	1.65e-05		1.31333	-4.55e-05
1.31667	2.4e-05		1.31667	1.9e-05		1.31667	-4.8e-05
1.32	1.8e-05		1.32	9.5e-06		1.32	-5.85e-05
1.32333	4.5e-06		1.32333	5.5e-06		1.32333	-6.5e-05
1.32667	6e-06		1.32667	9e-06		1.32667	-6.4e-05
1.33	2e-05		1.33	1.05e-05		1.33	-6.7e-05
1.33333	1.8e-05		1.33333	1.35e-05		1.33333	-6.7e-05
1.33667	1.15e-05		1.33667	1.25e-05		1.33667	-6.7e-05
1.34	9.5e-06		1.34	1.25e-05		1.34	-7.7e-05
1.34333	6e-06		1.34333	7.5e-06		1.34333	-7.55e-05
1.34667	2.5e-06		1.34667	1e-06		1.34667	-6.9e-05
1.35	6.5e-06		1.35	5.5e-06		1.35	-7.6e-05
1.35333	9e-06		1.35333	1.4e-05		1.35333	-6.75e-05
1.35667	7e-06		1.35667	2.45e-05		1.35667	-5.9e-05
1.36	5e-07		1.36	2.15e-05		1.36	-6.95e-05
1.36333	-7.5e-06		1.36333	9e-06		1.36333	-7.55e-05
1.36667	-6e-06		1.36667	8e-06		1.36667	-6.7e-05
1.37	-4.5e-06		1.37	1.55e-05		1.37	-6.95e-05
1.37333	6e-06		1.37333	6.5e-06		1.37333	-7.8e-05
1.37667	2.15e-05		1.37667	9e-06		1.37667	-7.55e-05
1.38	8e-06		1.38	1.95e-05		1.38	-7.7e-05
1.38333	1.5e-06		1.38333	1.7e-05		1.38333	-8.3e-05
1.38667	7.5e-06		1.38667	8e-06		1.38667	-9e-05
1.39	1e-05		1.39	4.5e-06		1.39	-8.9e-05
1.39333	1.7e-05		1.39333	2.05e-05		1.39333	-8e-05
1.39667	1.4e-05		1.39667	2.7e-05		1.39667	-7.3e-05
1.4	1.55e-05		1.4	2.2e-05		1.4	-6.95e-05
1.40333	2.3e-05		1.40333	2.1e-05		1.40333	-7.1e-05
1.40667	1.9e-05		1.40667	1.4e-05		1.40667	-6.85e-05
1.41	1.1e-05		1.41	1.45e-05		1.41	-6.1e-05
1.41333	5e-06		1.41333	1.95e-05		1.41333	-6.15e-05
1.41667	1.5e-06		1.41667	2.3e-05		1.41667	-6.15e-05
1.42	1.1e-05		1.42	2.8e-05		1.42	-6.1e-05
1.42333	1.55e-05		1.42333	2.05e-05		1.42333	-6.85e-05
1.42667	1.65e-05		1.42667	1.9e-05		1.42667	-7.15e-05
1.43	1.5e-05		1.43	2.7e-05		1.43	-7.35e-05
1.43333	8.5e-06		1.43333	2.3e-05		1.43333	-7.8e-05
1.43667	4e-06		1.43667	8.5e-06		1.43667	-7.25e-05
1.44	6e-06		1.44	-4.5e-06		1.44	-5.85e-05
1.44333	3e-06		1.44333	-3e-06		1.44333	-5.85e-05
1.44667	6.5e-06		1.44667	9e-06		1.44667	-6.9e-05
1.45	1.15e-05		1.45	2e-05		1.45	-6.95e-05
1.45333	1.5e-06		1.45333	1.9e-05		1.45333	-7.7e-05
1.45667	-6e-06		1.45667	1.1e-05		1.45667	-7.9e-05
1.46	-1.5e-06		1.46	1.4e-05		1.46	-7.6e-05
1.46333	1e-05		1.46333	1.85e-05		1.46333	-7.75e-05
1.46667	9.5e-06		1.46667	2.2e-05		1.46667	-7.2e-05
1.47	-5e-07		1.47	2.4e-05		1.47	-7.75e-05
1.47333	-5.5e-06		1.47333	1e-05		1.47333	-7.8e-05
1.47667	-1.5e-06		1.47667	5.5e-06		1.47667	-7.25e-05
1.48	5.5e-06		1.48	1.55e-05		1.48	-7.7e-05
1.48333	4.5e-06		1.48333	1.8e-05		1.48333	-7.5e-05
1.48667	-3.5e-06		1.48667	1.6e-05		1.48667	-7.1e-05
1.49	-3.5e-06		1.49	1.8e-05		1.49	-6.95e-05
1.49333	7e-06		1.49333	1.6e-05		1.49333	-6.7e-05
1.49667	2.3e-05		1.49667	1.7e-05		1.49667	-7.15e-05
1.5	2.35e-05		1.5	2.35e-05		1.5	-7.75e-05
1.50333	1.45e-05		1.50333	2.3e-05		1.50333	-7.2e-05
1.50667	7e-06		1.50667	1.6e-05		1.50667	-6.6e-05
1.51	3e-06		1.51	1.1e-05		1.51	-6.65e-05
1.51333	5e-06		1.51333	1.7e-05		1.51333	-7.25e-05
1.51667	1.1e-05		1.51667	2.65e-05		1.51667	-7.85e-05
1.52	7.5e-06		1.52	1.55e-05		1.52	-7.15e-05
1.52333	1.5e-06		1.52333	3e-06		1.52333	-6.8e-05
1.52667	1.5e-05		1.52667	1e-05		1.52667	-7.15e-05
1.53	1.6e-05		1.53	8.5e-06		1.53	-7.7e-05
1.53333	-1e-06		1.53333	8e-06		1.53333	-8.35e-05
1.53667	-9e-06		1.53667	9.5e-06		1.53667	-7.95e-05
1.54	1e-06		1.54	6e-06		1.54	-7.8e-05
1.54333	1e-05		1.54333	3.5e-06		1.54333	-7.95e-05
1.54667	1e-05		1.54667	4.5e-06		1.54667	-7.95e-05
1.55	5.5e-06		1.55	1.4e-05		1.55	-7.05e-05
1.55333	7.5e-06		1.55333	1.85e-05		1.55333	-6.75e-05
1.55667	1.65e-05		1.55667	2.35e-05		1.55667	-7.7e-05
1.56	1.85e-05		1.56	2.45e-05		1.56	-7.5e-05
1.56333	1.1e-05		1.56333	1.8e-05		1.56333	-7e-05
1.56667	9e-06		1.56667	1.4e-05		1.56667	-7.15e-05
1.57	-1e-06		1.57	9e-06		1.57	-7.6e-05
1.57333	-9e-06		1.57333	5.5e-06		1.57333	-8.3e-05
1.57667	1e-06		1.57667	8.5e-06		1.57667	-7.45e-05
1.58	-1e-06		1.58	1.8e-05		1.58	-7.6e-05
1.58333	-2e-06		1.58333	2.15e-05		1.58333	-9.05e-05
1.58667	4.5e-06		1.58667	1.5e-05		1.58667	-8.75e-05
1.59	3e-06		1.59	3e-06		1.59	-8.75e-05
1.59333	-1.5e-06		1.59333	8e-06		1.59333	-8.55e-05
1.59667	-4.5e-06		1.59667	1.65e-05		1.59667	-8.3e-05
1.6	5e-07		1.6	1.15e-05		1.6	-8.15e-05
1.60333	6e-06		1.60333	1e-05		1.60333	-8.05e-05
1.60667	1.5e-06		1.60667	7e-06		1.60667	-9.95e-05
1.61	-6.5e-06		1.61	6e-06		1.61	-0.0001085
1.61333	-1e-06		1.61333	7.5e-06		1.61333	-0.000108
1.61667	-1e-06		1.61667	1.05e-05		1.61667	-0.0001025
1.62	-8.5e-06		1.62	8.5e-06		1.62	-9.35e-05
1.62333	-4.5e-06		1.62333	1.5e-06		1.62333	-9.85e-05
1.62667	9e-06		1.62667	9e-06		1.62667	-9.2e-05
1.63	1.4e-05		1.63	2.15e-05		1.63	-7.65e-05
1.63333	5.5e-06		1.63333	2.3e-05		1.63333	-8.3e-05
1.63667	-5e-06		1.63667	2.45e-05		1.63667	-9.1e-05
1.64	-9.5e-06		1.64	2.75e-05		1.64	-9.05e-05
1.64333	-7.5e-06		1.64333	1.35e-05		1.64333	-9.3e-05
1.64667	-7e-06		1.64667	5.5e-06		1.64667	-8.75e-05
1.65	-3.5e-06		1.65	1.25e-05		1.65	-8.2e-05
1.65333	-5e-07		1.65333	1.3e-05		1.65333	-8.15e-05
1.65667	-1e-05		1.65667	7e-06		1.65667	-7.9e-05
1.66	-1.9e-05		1.66	6.5e-06		1.66	-8e-05
1.66333	-1.05e-05		1.66333	7.5e-06		1.66333	-7.45e-05
1.66667	-4.5e-06		1.66667	5e-07		1.66667	-7e-05
1.67	-8e-06		1.67	-2e-06		1.67	-8.65e-05
1.67333	-9.5e-06		1.67333	8.5e-06		1.67333	-0.0001005
1.67667	-7e-06		1.67667	2.25e-05		1.67667	-9.85e-05
1.68	-9e-06		1.68	3.1e-05		1.68	-9.55e-05
1.68333	-6e-06		1.68333	2.7e-05		1.68333	-0.0001015
1.68667	4.5e-06		1.68667	1.75e-05		1.68667	-0.0001005
1.69	2.5e-06		1.69	8.5e-06		1.69	-9.6e-05
1.69333	-2.5e-06		1.69333	3.5e-06		1.69333	-9.6e-05
1.69667	5e-07		1.69667	1.5e-06		1.69667	-9.3e-05
1.7	4.5e-06		1.7	-5e-07		1.7	-8.85e-05
1.70333	5.5e-06		1.70333	6e-06		1.70333	-8.85e-05
1.70667	1e-05		1.70667	1.45e-05		1.70667	-9.45e-05
1.71	1.6e-05		1.71	1.5e-05		1.71	-9.85e-05
1.71333	1.65e-05		1.71333	1.6e-05		1.71333	-9.55e-05
1.71667	7e-06		1.71667	5e-06		1.71667	-0.000101
1.72	-5e-06		1.72	-3.5e-06		1.72	-0.000109
1.72333	-2.5e-06		1.72333	1.1e-05		1.72333	-0.000112
1.72667	4.5e-06		1.72667	1.5e-05		1.72667	-0.0001125
1.73	1.5e-06		1.73	4.5e-06		1.73	-0.0001065
1.73333	6.5e-06		1.73333	-2e-06		1.73333	-0.0001015
1.73667	1e-05		1.73667	4.5e-06		1.73667	-9.95e-05
1.74	-1.5e-06		1.74	9e-06		1.74	-0.000115
1.74333	-7.5e-06		1.74333	1.6e-05		1.74333	-0.0001205
1.74667	-9e-06		1.74667	2.75e-05		1.74667	-0.0001055
1.75	-5.5e-06		1.75	2.65e-05		1.75	-9.55e-05
1.75333	-1.5e-06		1.75333	1.85e-05		1.75333	-9.1e-05
1.75667	8e-06		1.75667	1.5e-05		1.75667	-7.95e-05
1.76	-1e-06		1.76	1.35e-05		1.76	-6.95e-05
1.76333	-7.5e-06		1.76333	9.5e-06		1.76333	-8.4e-05
1.76667	-6.5e-06		1.76667	1.4e-05		1.76667	-9.45e-05
1.77	-2e-05		1.77	2.25e-05		1.77	-9.25e-05
1.77333	-2.05e-05		1.77333	2.1e-05		1.77333	-0.0001035
1.77667	-1.35e-05		1.77667	1.6e-05		1.77667	-0.0001125
1.78	-1.3e-05		1.78	9e-06		1.78	-0.0001095
1.78333	-1.1e-05		1.78333	5.5e-06		1.78333	-9.75e-05
1.78667	-6e-06		1.78667	8e-06		1.78667	-0.0001015
1.79	-5e-06		1.79	9e-06		1.79	-0.0001085
1.79333	-9.5e-06		1.79333	1.45e-05		1.79333	-0.000104
1.79667	-1e-05		1.79667	1.55e-05		1.79667	-8.95e-05
1.8	-8.5e-06		1.8	4e-06		1.8	-8.55e-05
1.80333	-1e-05		1.80333	-4.5e-06		1.80333	-9e-05
1.80667	-1.35e-05		1.80667	7.5e-06		1.80667	-9.3e-05
1.81	-1.05e-05		1.81	9.5e-06		1.81	-0.0001055
1.81333	-6.5e-06		1.81333	-2.5e-06		1.81333	-9.9e-05
1.81667	-1.35e-05		1.81667	5e-06		1.81667	-9e-05
1.82	-1.55e-05		1.82	-1e-06		1.82	-9.75e-05
1.82333	-2.15e-05		1.82333	-5.5e-06		1.82333	-0.000106
1.82667	-2e-05		1.82667	1.55e-05		1.82667	-0.0001015
1.83	1e-06		1.83	1.7e-05		1.83	-0.000101
1.83333	5e-07		1.83333	1.1e-05		1.83333	-0.00011
1.83667	-1.15e-05		1.83667	1.35e-05		1.83667	-9.95e-05
1.84	-7.5e-06		1.84	6.5e-06		1.84	-9.45e-05
1.84333	-6.5e-06		1.84333	1.05e-05		1.84333	-0.0001055
1.84667	-6e-06		1.84667	1.55e-05		1.84667	-0.000106
1.85	-7e-06		1.85	5e-06		1.85	-9.05e-05
1.85333	-2.15e-05		1.85333	2e-06		1.85333	-9.8e-05
1.85667	-2.75e-05		1.85667	8e-06		1.85667	-0.000116
1.86	-2.25e-05		1.86	9e-06		1.86	-0.000113
1.86333	-1.45e-05		1.86333	1.25e-05		1.86333	-0.00011
1.86667	-1.5e-06		1.86667	1.85e-05		1.86667	-0.000109
1.87	3.5e-06		1.87	1.05e-05		1.87	-0.0001085
1.87333	-6.5e-06		1.87333	1.35e-05		1.87333	-0.0001145
1.87667	-1.4e-05		1.87667	2.15e-05		1.87667	-0.000122
1.88	-1.3e-05		1.88	1.45e-05		1.88	-0.000112
1.88333	-1.5e-05		1.88333	1.3e-05		1.88333	-0.000104
1.88667	-2.15e-05		1.88667	2.05e-05		1.88667	-0.000112
1.89	-1.15e-05		1.89	2.15e-05		1.89	-0.0001175
1.89333	0		1.89333	8e-06		1.89333	-0.0001125
1.89667	-1.05e-05		1.89667	-5e-07		1.89667	-0.0001095
1.9	-1.9e-05		1.9	3e-06		1.9	-0.000107
1.90333	-2.3e-05		1.90333	2.5e-06		1.90333	-0.000105
1.90667	-2.55e-05		1.90667	5.5e-06		1.90667	-0.0001115
1.91	-1.6e-05		1.91	2.5e-06		1.91	-0.0001125
1.91333	-7e-06		1.91333	2e-06		1.91333	-0.00011
1.91667	-5e-06		1.91667	7.5e-06		1.91667	-0.000109
1.92	-2.5e-06		1.92	6.5e-06		1.92	-0.0001105
1.92333	-1.25e-05		1.92333	9.5e-06		1.92333	-0.0001165
1.92667	-2.65e-05		1.92667	1.5e-05		1.92667	-0.0001255
1.93	-2.55e-05		1.93	1.85e-05		1.93	-0.0001205
1.93333	-1.95e-05		1.93333	1.75e-05		1.93333	-0.000119
1.93667	-2.2e-05		1.93667	1.3e-05		1.93667	-0.000125
1.94	-3e-05		1.94	4e-06		1.94	-0.00012
1.94333	-2.55e-05		1.94333	5e-06		1.94333	-0.0001175
1.94667	-1.7e-05		1.94667	8.5e-06		1.94667	-0.0001155
1.95	-1.4e-05		1.95	1.45e-05		1.95	-0.0001175
1.95333	-2.3e-05		1.95333	1.05e-05		1.95333	-0.000126
1.95667	-2.45e-05		1.95667	7e-06		1.95667	-0.0001305
1.96	-2.6e-05		1.96	7e-06		1.96	-0.0001245
1.96333	-3.15e-05		1.96333	9.5e-06		1.96333	-0.000125
1.96667	-2.6e-05		1.96667	2.1e-05		1.96667	-0.000128
1.97	-3.5e-05		1.97	1.9e-05		1.97	-0.0001245
1.97333	-2.9e-05		1.97333	9.5e-06		1.97333	-0.0001335
1.97667	-1.7e-05		1.97667	0		1.97667	-0.0001355
1.98	-1.95e-05		1.98	1e-05		1.98	-0.000134
1.98333	-2.05e-05		1.98333	1.7e-05		1.98333	-0.0001315
1.98667	-2e-05		1.98667	1.05e-05		1.98667	-0.000127
1.99	-1.55e-05		1.99	2.5e-06		1.99	-0.0001335
1.99333	-1.35e-05		1.99333	8e-06		1.99333	-0.000134
1.99667	-1.1e-05		1.99667	1.95e-05		1.99667	-0.0001395
2	-1.35e-05		2	1.65e-05		2	-0.0001385
2.00333	-2.35e-05		2.00333	7.5e-06		2.00333	-0.000124
2.00667	-3.6e-05		2.00667	-1e-06		2.00667	-0.000127
2.01	-3.65e-05		2.01	-4e-06		2.01	-0.000133
2.01333	-2.5e-05		2.01333	-5e-06		2.01333	-0.000131
2.01667	-2.15e-05		2.01667	2.5e-06		2.01667	-0.0001285
2.02	-2.8e-05		2.02	1.6e-05		2.02	-0.000126
2.02333	-3.2e-05		2.02333	2.7e-05		2.02333	-0.0001265
2.02667	-3e-05		2.02667	2.35e-05		2.02667	-0.000128
2.03	-3.25e-05		2.03	1e-05		2.03	-0.000124
2.03333	-3.6e-05		2.03333	1.2e-05		2.03333	-0.000131
2.03667	-3.6e-05		2.03667	1.7e-05		2.03667	-0.0001355
2.04	-3.95e-05		2.04	1.6e-05		2.04	-0.000136
2.04333	-4.4e-05		2.04333	3.5e-06		2.04333	-0.0001425
2.04667	-4.8e-05		2.04667	3.5e-06		2.04667	-0.0001345
2.05	-3.9e-05		2.05	2.1e-05		2.05	-0.00013
2.05333	-3.2e-05		2.05333	2.6e-05		2.05333	-0.0001295
2.05667	-3.95e-05		2.05667	1.8e-05		2.05667	-0.000126
2.06	-4.15e-05		2.06	7e-06		2.06	-0.0001255
2.06333	-3.05e-05		2.06333	4e-06		2.06333	-0.0001305
2.06667	-3e-05		2.06667	5.5e-06		2.06667	-0.000141
2.07	-2.15e-05		2.07	2.5e-06		2.07	-0.000141
2.07333	-1.5e-05		2.07333	3e-06		2.07333	-0.0001315
2.07667	-1.9e-05		2.07667	9e-06		2.07667	-0.000124
2.08	-1.4e-05		2.08	1.6e-05		2.08	-0.0001235
2.08333	-1.7e-05		2.08333	1.4e-05		2.08333	-0.000137
2.08667	-2.2e-05		2.08667	1.2e-05		2.08667	-0.000151
2.09	-2e-05		2.09	1.3e-05		2.09	-0.0001525
2.09333	-1.95e-05		2.09333	1.6e-05		2.09333	-0.0001415
2.09667	-1.85e-05		2.09667	1.65e-05		2.09667	-0.0001285
2.1	-1.95e-05		2.1	1.3e-05		2.1	-0.0001255
2.10333	-2.5e-05		2.10333	9.5e-06		2.10333	-0.0001325
2.10667	-3.05e-05		2.10667	1e-05		2.10667	-0.000133
2.11	-2.75e-05		2.11	1.9e-05		2.11	-0.0001295
2.11333	-1.9e-05		2.11333	1.65e-05		2.11333	-0.000134
2.11667	-2.35e-05		2.11667	9e-06		2.11667	-0.0001445
2.12	-2.85e-05		2.12	1e-05		2.12	-0.0001335
2.12333	-2.6e-05		2.12333	2.2e-05		2.12333	-0.0001275
2.12667	-2.45e-05		2.12667	3e-05		2.12667	-0.000148
2.13	-3.5e-05		2.13	2.5e-05		2.13	-0.0001515
2.13333	-4.1e-05		2.13333	1.8e-05		2.13333	-0.00014
2.13667	-3.3e-05		2.13667	6.5e-06		2.13667	-0.000141
2.14	-3.55e-05		2.14	-2.5e-06		2.14	-0.00014
2.14333	-3.55e-05		2.14333	8.5e-06		2.14333	-0.000127
2.14667	-3.15e-05		2.14667	8.5e-06		2.14667	-0.0001215
2.15	-4.3e-05		2.15	3.5e-06		2.15	-0.0001215
2.15333	-4.7e-05		2.15333	1.05e-05		2.15333	-0.0001275
2.15667	-4.4e-05		2.15667	1.7e-05		2.15667	-0.000139
2.16	-4.1e-05		2.16	2e-05		2.16	-0.0001525
2.16333	-4.85e-05		2.16333	1.1e-05		2.16333	-0.000149
2.16667	-5.15e-05		2.16667	1.15e-05		2.16667	-0.0001385
2.17	-4.85e-05		2.17	7.5e-06		2.17	-0.0001405
2.17333	-4.6e-05		2.17333	1.4e-05		2.17333	-0.000143
2.17667	-4.25e-05		2.17667	2.55e-05		2.17667	-0.0001435
2.18	-4.65e-05		2.18	-5e-07		2.18	-0.000144
2.18333	-4.45e-05		2.18333	-4e-06		2.18333	-0.000149
2.18667	-3.5e-05		2.18667	1.55e-05		2.18667	-0.000149
2.19	-3.05e-05		2.19	1.45e-05		2.19	-0.0001445
2.19333	-3.15e-05		2.19333	3.5e-06		2.19333	-0.0001475
2.19667	-2.9e-05		2.19667	1e-05		2.19667	-0.0001535
2.2	-3.7e-05		2.2	2.15e-05		2.2	-0.0001515
2.20333	-4.25e-05		2.20333	1.65e-05		2.20333	-0.000147
2.20667	-3.15e-05		2.20667	1.25e-05		2.20667	-0.000139
2.21	-3.35e-05		2.21	1.4e-05		2.21	-0.0001375
2.21333	-4.75e-05		2.21333	1.35e-05		2.21333	-0.000135
2.21667	-4.9e-05		2.21667	1.35e-05		2.21667	-0.000138
2.22	-5.6e-05		2.22	1.8e-05		2.22	-0.000156
2.22333	-5.85e-05		2.22333	2e-05		2.22333	-0.000147
2.22667	-5.1e-05		2.22667	1.55e-05		2.22667	-0.000136
2.23	-5.9e-05		2.23	1.1e-05		2.23	-0.0001505
2.23333	-6.6e-05		2.23333	1.9e-05		2.23333	-0.000154
2.23667	-5.25e-05		2.23667	2.2e-05		2.23667	-0.0001495
2.24	-4.35e-05		2.24	2.1e-05		2.24	-0.0001545
2.24333	-4.75e-05		2.24333	2.45e-05		2.24333	-0.0001535
2.24667	-4.85e-05		2.24667	2.05e-05		2.24667	-0.000154
2.25	-5.4e-05		2.25	2.15e-05		2.25	-0.0001505
2.25333	-5e-05		2.25333	3e-05		2.25333	-0.0001435
2.25667	-4.3e-05		2.25667	2.5e-05		2.25667	-0.0001375
2.26	-4.1e-05		2.26	1.4e-05		2.26	-0.00014
2.26333	-4.05e-05		2.26333	1.45e-05		2.26333	-0.0001535
2.26667	-3.95e-05		2.26667	2.45e-05		2.26667	-0.0001595
2.27	-3.5e-05		2.27	2.95e-05		2.27	-0.0001555
2.27333	-4.1e-05		2.27333	2.3e-05		2.27333	-0.000153
2.27667	-5.1e-05		2.27667	2.15e-05		2.27667	-0.0001475
2.28	-5.8e-05		2.28	2e-05		2.28	-0.0001465
2.28333	-5.05e-05		2.28333	4e-06		2.28333	-0.0001545
2.28667	-3.8e-05		2.28667	4e-06		2.28667	-0.0001605
2.29	-4.3e-05		2.29	1.55e-05		2.29	-0.0001645
2.29333	-5.35e-05		2.29333	1.95e-05		2.29333	-0.0001635
2.29667	-5.3e-05		2.29667	1.1e-05		2.29667	-0.0001625
2.3	-5.05e-05		2.3	4.5e-06		2.3	-0.000158
2.30333	-5.2e-05		2.30333	2.5e-06		2.30333	-0.0001535
2.30667	-5.2e-05		2.30667	1.5e-05		2.30667	-0.0001555
2.31	-6.15e-05		2.31	2.2e-05		2.31	-0.000155
2.31333	-5.6e-05		2.31333	1.1e-05		2.31333	-0.0001445
2.31667	-3.75e-05		2.31667	1.55e-05		2.31667	-0.0001425
2.32	-3.2e-05		2.32	1.95e-05		2.32	-0.000154
2.32333	-4e-05		2.32333	1.85e-05		2.32333	-0.000152
2.32667	-6.1e-05		2.32667	1.3e-05		2.32667	-0.0001445
2.33	-6.75e-05		2.33	1e-05		2.33	-0.000146
2.33333	-5.75e-05		2.33333	7.5e-06		2.33333	-0.000157
2.33667	-5.5e-05		2.33667	1.05e-05		2.33667	-0.000164
2.34	-5.45e-05		2.34	1.85e-05		2.34	-0.0001535
2.34333	-4.65e-05		2.34333	2.3e-05		2.34333	-0.000145
2.34667	-5.1e-05		2.34667	2.1e-05		2.34667	-0.0001495
2.35	-6.3e-05		2.35	8.5e-06		2.35	-0.000162
2.35333	-6.45e-05		2.35333	3.5e-06		2.35333	-0.0001725
2.35667	-6.1e-05		2.35667	1.05e-05		2.35667	-0.000164
2.36	-5.9e-05		2.36	1.5e-05		2.36	-0.0001505
2.36333	-6e-05		2.36333	1.2e-05		2.36333	-0.000158
2.36667	-5.6e-05		2.36667	1.2e-05		2.36667	-0.000161
2.37	-6e-05		2.37	1.25e-05		2.37	-0.0001535
2.37333	-6.75e-05		2.37333	1.15e-05		2.37333	-0.000156
2.37667	-6.05e-05		2.37667	1.15e-05		2.37667	-0.0001595
2.38	-5.65e-05		2.38	8.5e-06		2.38	-0.0001605
2.38333	-5.35e-05		2.38333	1.25e-05		2.38333	-0.0001575
2.38667	-5.25e-05		2.38667	1.05e-05		2.38667	-0.000161
2.39	-5.1e-05		2.39	5.5e-06		2.39	-0.000164
2.39333	-5e-05		2.39333	1.2e-05		2.39333	-0.0001605
2.39667	-5.95e-05		2.39667	1.3e-05		2.39667	-0.000161
2.4	-5.7e-05		2.4	3e-06		2.4	-0.0001625
2.40333	-5.15e-05		2.40333	5e-07		2.40333	-0.0001605
2.40667	-4.35e-05		2.40667	2.5e-06		2.40667	-0.000163
2.41	-4.6e-05		2.41	1.25e-05		2.41	-0.0001555
2.41333	-6e-05		2.41333	2.1e-05		2.41333	-0.000148
2.41667	-6.3e-05		2.41667	1.45e-05		2.41667	-0.000159
2.42	-7.1e-05		2.42	9.5e-06		2.42	-0.0001695
2.42333	-6.95e-05		2.42333	6e-06		2.42333	-0.0001795
2.42667	-5.35e-05		2.42667	5e-06		2.42667	-0.000172
2.43	-5.7e-05		2.43	1.15e-05		2.43	-0.000161
2.43333	-7.1e-05		2.43333	1.9e-05		2.43333	-0.0001655
2.43667	-7.15e-05		2.43667	1.45e-05		2.43667	-0.000165
2.44	-7.35e-05		2.44	1.3e-05		2.44	-0.000165
2.44333	-7.45e-05		2.44333	1.85e-05		2.44333	-0.000161
2.44667	-8.35e-05		2.44667	1.25e-05		2.44667	-0.000158
2.45	-8.3e-05		2.45	6.5e-06		2.45	-0.00016
2.45333	-5.8e-05		2.45333	1.7e-05		2.45333	-0.0001635
2.45667	-5.45e-05		2.45667	1.7e-05		2.45667	-0.0001685
2.46	-6.7e-05		2.46	3e-06		2.46	-0.0001745
2.46333	-6.65e-05		2.46333	7e-06		2.46333	-0.0001785
2.46667	-6.3e-05		2.46667	2e-06		2.46667	-0.0001835
2.47	-6.5e-05		2.47	-7e-06		2.47	-0.0001815
2.47333	-7.2e-05		2.47333	5e-07		2.47333	-0.0001785
2.47667	-6.95e-05		2.47667	1.2e-05		2.47667	-0.0001745
2.48	-6.65e-05		2.48	1.45e-05		2.48	-0.000172
2.48333	-7.1e-05		2.48333	3e-06		2.48333	-0.0001705
2.48667	-6.65e-05		2.48667	4e-06		2.48667	-0.0001665
2.49	-6.5e-05		2.49	8e-06		2.49	-0.000176
2.49333	-6.85e-05		2.49333	-1.5e-06		2.49333	-0.0001835
2.49667	-6e-05		2.49667	-5.5e-06		2.49667	-0.0001825
2.5	-6.25e-05		2.5	-2e-06		2.5	-0.000178
2.50333	-7.95e-05		2.50333	5.5e-06		2.50333	-0.000179
2.50667	-8.35e-05		2.50667	2e-06		2.50667	-0.000174
2.51	-8.1e-05		2.51	-1e-06		2.51	-0.000172
2.51333	-7e-05		2.51333	1.1e-05		2.51333	-0.0001685
2.51667	-6.7e-05		2.51667	1.55e-05		2.51667	-0.000167
2.52	-6.85e-05		2.52	1.7e-05		2.52	-0.000178
2.52333	-6.35e-05		2.52333	4.5e-06		2.52333	-0.0001825
2.52667	-6.25e-05		2.52667	2e-06		2.52667	-0.000181
2.53	-6.8e-05		2.53	4.5e-06		2.53	-0.0001755
2.53333	-8.1e-05		2.53333	3.5e-06		2.53333	-0.0001675
2.53667	-8.5e-05		2.53667	1.05e-05		2.53667	-0.000167
2.54	-7.8e-05		2.54	2.5e-06		2.54	-0.0001735
2.54333	-7.3e-05		2.54333	-1e-06		2.54333	-0.0001815
2.54667	-7.85e-05		2.54667	-7e-06		2.54667	-0.000188
2.55	-8.4e-05		2.55	-1.1e-05		2.55	-0.000194
2.55333	-8.45e-05		2.55333	-1.5e-06		2.55333	-0.00019
2.55667	-7.7e-05		2.55667	3.5e-06		2.55667	-0.0001795
2.56	-5.75e-05		2.56	-2.5e-06		2.56	-0.000176
2.56333	-5.75e-05		2.56333	0		2.56333	-0.0001755
2.56667	-7.35e-05		2.56667	5.5e-06		2.56667	-0.0001775
2.57	-7.8e-05		2.57	1e-06		2.57	-0.0001835
2.57333	-7.5e-05		2.57333	1.5e-06		2.57333	-0.0001845
2.57667	-7.05e-05		2.57667	2e-06		2.57667	-0.0001775
2.58	-7.85e-05		2.58	1.5e-06		2.58	-0.00017
2.58333	-8.25e-05		2.58333	-5e-07		2.58333	-0.0001765
2.58667	-7.45e-05		2.58667	-1.5e-06		2.58667	-0.0001835
2.59	-6.3e-05		2.59	5e-06		2.59	-0.00018
2.59333	-6e-05		2.59333	7.5e-06		2.59333	-0.0001795
2.59667	-7.25e-05		2.59667	1.2e-05		2.59667	-0.000186
2.6	-7.9e-05		2.6	2e-05		2.6	-0.0001895
2.60333	-7.5e-05		2.60333	1e-05		2.60333	-0.00019
2.60667	-7.35e-05		2.60667	-2.5e-06		2.60667	-0.0001885
2.61	-7.15e-05		2.61	0		2.61	-0.000177
2.61333	-7.45e-05		2.61333	-5e-06		2.61333	-0.0001635
2.61667	-7.8e-05		2.61667	-1.2e-05		2.61667	-0.0001695
2.62	-7.7e-05		2.62	-1.25e-05		2.62	-0.0001735
2.62333	-7.5e-05		2.62333	-6.5e-06		2.62333	-0.000173
2.62667	-7.9e-05		2.62667	5e-06		2.62667	-0.0001835
2.63	-8.85e-05		2.63	1.25e-05		2.63	-0.000175
2.63333	-8.65e-05		2.63333	1.3e-05		2.63333	-0.0001745
2.63667	-8.55e-05		2.63667	6e-06		2.63667	-0.0001855
2.64	-8.45e-05		2.64	5e-07		2.64	-0.000181
2.64333	-7e-05		2.64333	2.5e-06		2.64333	-0.000179
2.64667	-7.5e-05		2.64667	3.5e-06		2.64667	-0.000187
2.65	-8e-05		2.65	0		2.65	-0.0001875
2.65333	-6.8e-05		2.65333	-4e-06		2.65333	-0.0001745
2.65667	-7.7e-05		2.65667	6.5e-06		2.65667	-0.0001795
2.66	-8.45e-05		2.66	1.5e-05		2.66	-0.0001845
2.66333	-8.6e-05		2.66333	6e-06		2.66333	-0.00017
2.66667	-9.05e-05		2.66667	5e-07		2.66667	-0.0001765
2.67	-8.3e-05		2.67	-1.1e-05		2.67	-0.00018
2.67333	-8.05e-05		2.67333	-1.75e-05		2.67333	-0.0001725
2.67667	-8.2e-05		2.67667	-5.5e-06		2.67667	-0.000184
2.68	-7.65e-05		2.68	2e-06		2.68	-0.0001915
2.68333	-9e-05		2.68333	2e-06		2.68333	-0.0001905
2.68667	-9.7e-05		2.68667	-1.3e-05		2.68667	-0.0001915
2.69	-9.05e-05		2.69	-2.3e-05		2.69	-0.00019
2.69333	-9.1e-05		2.69333	-1.9e-05		2.69333	-0.0001845
2.69667	-8.8e-05		2.69667	-1e-05		2.69667	-0.000187
2.7	-8.6e-05		2.7	-6.5e-06		2.7	-0.000192
2.70333	-9e-05		2.70333	-4.5e-06		2.70333	-0.000195
2.70667	-8.9e-05		2.70667	1.5e-06		2.70667	-0.000196
2.71	-8.2e-05		2.71	-6e-06		2.71	-0.0002005
2.71333	-8.65e-05		2.71333	-1.45e-05		2.71333	-0.0001955
2.71667	-9.15e-05		2.71667	-8.5e-06		2.71667	-0.000188
2.72	-8.9e-05		2.72	-7.5e-06		2.72	-0.0001885
2.72333	-9.3e-05		2.72333	-1e-05		2.72333	-0.0001845
2.72667	-9.9e-05		2.72667	-8.5e-06		2.72667	-0.0001825
2.73	-0.000103		2.73	-1.6e-05		2.73	-0.000182
2.73333	-0.0001		2.73333	-1.9e-05		2.73333	-0.0001805
2.73667	-8.9e-05		2.73667	-6e-06		2.73667	-0.0001835
2.74	-7.85e-05		2.74	-4e-06		2.74	-0.0001815
2.74333	-8.15e-05		2.74333	-2.5e-06		2.74333	-0.000176
2.74667	-8.65e-05		2.74667	-1.5e-06		2.74667	-0.0001885
2.75	-9.2e-05		2.75	-9.5e-06		2.75	-0.0001955
2.75333	-9.25e-05		2.75333	-1.45e-05		2.75333	-0.0001855
2.75667	-9.65e-05		2.75667	-2.35e-05		2.75667	-0.0001855
2.76	-9.8e-05		2.76	-2.8e-05		2.76	-0.0001995
2.76333	-9.05e-05		2.76333	-2.95e-05		2.76333	-0.000208
2.76667	-9.7e-05		2.76667	-2.1e-05		2.76667	-0.0001945
2.77	-9.4e-05		2.77	-1.45e-05		2.77	-0.0001865
2.77333	-9.45e-05		2.77333	-7.5e-06		2.77333	-0.0001965
2.77667	-0.000107		2.77667	-5.5e-06		2.77667	-0.000198
2.78	-0.0001005		2.78	-1.4e-05		2.78	-0.0001995
2.78333	-9.5e-05		2.78333	-1.5e-05		2.78333	-0.0002035
2.78667	-9.5e-05		2.78667	-1.25e-05		2.78667	-0.000193
2.79	-8.35e-05		2.79	-1e-05		2.79	-0.0001805
2.79333	-8.5e-05		2.79333	-1.25e-05		2.79333	-0.0001785
2.79667	-9.75e-05		2.79667	-1.2e-05		2.79667	-0.00019
2.8	-9.4e-05		2.8	-3.5e-06		2.8	-0.0001925
2.80333	-8.7e-05		2.80333	-7.5e-06		2.80333	-0.000182
2.80667	-9.05e-05		2.80667	-1.5e-05		2.80667	-0.0001925
2.81	-8.8e-05		2.81	-2.15e-05		2.81	-0.0002065
2.81333	-8.45e-05		2.81333	-1.85e-05		2.81333	-0.000194
2.81667	-9.65e-05		2.81667	-4e-06		2.81667	-0.00019
2.82	-0.0001085		2.82	-2.5e-06		2.82	-0.000196
2.82333	-0.0001115		2.82333	-2e-06		2.82333	-0.0001915
2.82667	-0.0001115		2.82667	-7e-06		2.82667	-0.0001865
2.83	-0.000103		2.83	-1.5e-05		2.83	-0.000182
2.83333	-9.1e-05		2.83333	-1.35e-05		2.83333	-0.00019
2.83667	-8.55e-05		2.83667	-1.55e-05		2.83667	-0.000191
2.84	-8.55e-05		2.84	-1.75e-05		2.84	-0.000187
2.84333	-9.1e-05		2.84333	-1.75e-05		2.84333	-0.0001925
2.84667	-9.5e-05		2.84667	-2e-05		2.84667	-0.0001975
2.85	-0.000104		2.85	-1.5e-05		2.85	-0.0001965
2.85333	-0.000115		2.85333	-4e-06		2.85333	-0.0001895
2.85667	-0.000109		2.85667	-7.5e-06		2.85667	-0.0001865
2.86	-0.000101		2.86	-1.4e-05		2.86	-0.0001935
2.86333	-0.0001005		2.86333	-1.4e-05		2.86333	-0.0001975
2.86667	-9.75e-05		2.86667	-1.7e-05		2.86667	-0.000202
2.87	-9.85e-05		2.87	-2.4e-05		2.87	-0.000209
2.87333	-9.9e-05		2.87333	-3e-05		2.87333	-0.000199
2.87667	-9.4e-05		2.87667	-2.05e-05		2.87667	-0.0001925
2.88	-8.9e-05		2.88	-1.6e-05		2.88	-0.0001955
2.88333	-9.85e-05		2.88333	-1.9e-05		2.88333	-0.000193
2.88667	-0.0001105		2.88667	-2.2e-05		2.88667	-0.000192
2.89	-0.0001065		2.89	-2.6e-05		2.89	-0.0001885
2.89333	-0.000104		2.89333	-3e-05		2.89333	-0.0001905
2.89667	-0.000107		2.89667	-4.05e-05		2.89667	-0.0001985
2.9	-0.0001165		2.9	-2.9e-05		2.9	-0.00021
2.90333	-0.0001205		2.90333	-1.5e-05		2.90333	-0.000204
2.90667	-0.0001095		2.90667	-2.05e-05		2.90667	-0.000185
2.91	-0.0001065		2.91	-2.5e-05		2.91	-0.0001895
2.91333	-0.0001135		2.91333	-2.65e-05		2.91333	-0.0002025
2.91667	-9.95e-05		2.91667	-2.45e-05		2.91667	-0.0001995
2.92	-9.05e-05		2.92	-3.1e-05		2.92	-0.0001975
2.92333	-0.0001005		2.92333	-3.85e-05		2.92333	-0.0001995
2.92667	-0.0001135		2.92667	-3.55e-05		2.92667	-0.0002005
2.93	-0.0001075		2.93	-3e-05		2.93	-0.000196
2.93333	-0.0001		2.93333	-2.3e-05		2.93333	-0.000194
2.93667	-0.0001095		2.93667	-2.4e-05		2.93667	-0.000199
2.94	-0.000106		2.94	-3.35e-05		2.94	-0.0001995
2.94333	-0.0001015		2.94333	-3.05e-05		2.94333	-0.000199
2.94667	-0.0001135		2.94667	-2.45e-05		2.94667	-0.0001945
2.95	-0.000123		2.95	-2.5e-05		2.95	-0.0002115
2.95333	-0.0001195		2.95333	-2.05e-05		2.95333	-0.000226
2.95667	-0.000111		2.95667	-2.35e-05		2.95667	-0.000216
2.96	-0.000104		2.96	-2.4e-05		2.96	-0.0002115
2.96333	-9.8e-05		2.96333	-2e-05		2.96333	-0.000211
2.96667	-9.7e-05		2.96667	-2.5e-05		2.96667	-0.000205
2.97	-0.000107		2.97	-2.75e-05		2.97	-0.0002055
2.97333	-0.0001145		2.97333	-2.35e-05		2.97333	-0.0002025
2.97667	-0.000119		2.97667	-1.95e-05		2.97667	-0.000193
2.98	-0.0001125		2.98	-2.4e-05		2.98	-0.000202
2.98333	-0.000111		2.98333	-2.85e-05		2.98333	-0.0002045
2.98667	-0.0001265		2.98667	-2.4e-05		2.98667	-0.000202
2.99	-0.0001175		2.99	-1.7e-05		2.99	-0.0002085
2.99333	-0.000101		2.99333	-2.6e-05		2.99333	-0.000206
2.99667	-0.0001055		2.99667	-2.8e-05		2.99667	-0.000199
3	-0.0001035		3	-2.4e-05		3	-0.000197
3.00333	-0.0001015		3.00333	-2.75e-05		3.00333	-0.000202
3.00667	-0.000111		3.00667	-2.25e-05		3.00667	-0.0002055
3.01	-0.0001175		3.01	-1.95e-05		3.01	-0.0002075
3.01333	-0.000123		3.01333	-2.6e-05		3.01333	-0.0002125
3.01667	-0.000127		3.01667	-3.9e-05		3.01667	-0.0002145
3.02	-0.0001265		3.02	-3.75e-05		3.02	-0.0002185
3.02333	-0.0001165		3.02333	-2.1e-05		3.02333	-0.000214
3.02667	-0.000113		3.02667	-2.25e-05		3.02667	-0.000209
3.03	-0.000123		3.03	-3.6e-05		3.03	-0.000206
3.03333	-0.000122		3.03333	-3.55e-05		3.03333	-0.0002055
3.03667	-0.0001055		3.03667	-2.9e-05		3.03667	-0.000208
3.04	-9.45e-05		3.04	-3.2e-05		3.04	-0.0002045
3.04333	-9.85e-05		3.04333	-2.95e-05		3.04333	-0.0002045
3.04667	-0.0001045		3.04667	-1.6e-05		3.04667	-0.000205
3.05	-0.000104		3.05	-2.4e-05		3.05	-0.000212
3.05333	-0.00011		3.05333	-3.2e-05		3.05333	-0.0002145
3.05667	-0.000119		3.05667	-2.7e-05		3.05667	-0.0002035
3.06	-0.0001135		3.06	-3.45e-05		3.06	-0.0002015
3.06333	-0.0001075		3.06333	-3.05e-05		3.06333	-0.000213
3.06667	-0.0001045		3.06667	-2.25e-05		3.06667	-0.000214
3.07	-9.55e-05		3.07	-3.2e-05		3.07	-0.000213
3.07333	-0.000108		3.07333	-3.35e-05		3.07333	-0.000212
3.07667	-0.000126		3.07667	-2.2e-05		3.07667	-0.0002055
3.08	-0.000119		3.08	-2.1e-05		3.08	-0.0002065
3.08333	-0.0001095		3.08333	-2.6e-05		3.08333	-0.0002125
3.08667	-0.0001095		3.08667	-2.7e-05		3.08667	-0.000216
3.09	-0.000113		3.09	-3.95e-05		3.09	-0.000222
3.09333	-0.0001155		3.09333	-4.95e-05		3.09333	-0.000221
3.09667	-0.0001245		3.09667	-5.15e-05		3.09667	-0.0002195
3.1	-0.0001245		3.1	-4e-05		3.1	-0.0002165
3.10333	-0.0001145		3.10333	-2.8e-05		3.10333	-0.000216
3.10667	-0.0001225		3.10667	-3.75e-05		3.10667	-0.000218
3.11	-0.0001305		3.11	-4.4e-05		3.11	-0.0002085
3.11333	-0.000124		3.11333	-3.4e-05		3.11333	-0.0002135
3.11667	-0.0001265		3.11667	-2.65e-05		3.11667	-0.000221
3.12	-0.0001315		3.12	-2.9e-05		3.12	-0.0002215
3.12333	-0.000122		3.12333	-3.15e-05		3.12333	-0.0002145
3.12667	-0.0001255		3.12667	-3.1e-05		3.12667	-0.0002
3.13	-0.000127		3.13	-2.9e-05		3.13	-0.000204
3.13333	-0.00012		3.13333	-2.9e-05		3.13333	-0.000206
3.13667	-0.000121		3.13667	-2.7e-05		3.13667	-0.000208
3.14	-0.000118		3.14	-3.15e-05		3.14	-0.000214
3.14333	-0.0001235		3.14333	-4.65e-05		3.14333	-0.0002125
3.14667	-0.0001275		3.14667	-5.25e-05		3.14667	-0.0002135
3.15	-0.000127		3.15	-4e-05		3.15	-0.000216
3.15333	-0.000129		3.15333	-2.6e-05		3.15333	-0.000217
3.15667	-0.000134		3.15667	-2.65e-05		3.15667	-0.0002175
3.16	-0.0001385		3.16	-3.5e-05		3.16	-0.0002155
3.16333	-0.000142		3.16333	-3.65e-05		3.16333	-0.000217
3.16667	-0.0001415		3.16667	-4.2e-05		3.16667	-0.0002105
3.17	-0.0001335		3.17	-5.15e-05		3.17	-0.0002065
3.17333	-0.0001325		3.17333	-4.2e-05		3.17333	-0.000217
3.17667	-0.0001305		3.17667	-4.15e-05		3.17667	-0.000224
3.18	-0.0001265		3.18	-4.95e-05		3.18	-0.0002215
3.18333	-0.0001235		3.18333	-4.15e-05		3.18333	-0.0002115
3.18667	-0.0001185		3.18667	-4.05e-05		3.18667	-0.0002155
3.19	-0.000123		3.19	-4.4e-05		3.19	-0.0002215
3.19333	-0.0001365		3.19333	-4.35e-05		3.19333	-0.00021
3.19667	-0.000131		3.19667	-4.7e-05		3.19667	-0.0002065
3.2	-0.0001265		3.2	-4.75e-05		3.2	-0.0002155
3.20333	-0.000135		3.20333	-4.8e-05		3.20333	-0.000215
3.20667	-0.000131		3.20667	-5.25e-05		3.20667	-0.000202
3.21	-0.0001325		3.21	-4.9e-05		3.21	-0.0002035
3.21333	-0.000133		3.21333	-4.15e-05		3.21333	-0.0002105
3.21667	-0.0001275		3.21667	-4e-05		3.21667	-0.0002145
3.22	-0.0001275		3.22	-4.15e-05		3.22	-0.000224
3.22333	-0.000137		3.22333	-4.7e-05		3.22333	-0.000228
3.22667	-0.000135		3.22667	-4e-05		3.22667	-0.000223
3.23	-0.0001335		3.23	-3.8e-05		3.23	-0.0002195
3.23333	-0.0001405		3.23333	-5.25e-05		3.23333	-0.000222
3.23667	-0.000134		3.23667	-5.75e-05		3.23667	-0.0002295
3.24	-0.0001245		3.24	-6.65e-05		3.24	-0.0002285
3.24333	-0.0001165		3.24333	-6.5e-05		3.24333	-0.0002175
3.24667	-0.0001265		3.24667	-5.4e-05		3.24667	-0.0002125
3.25	-0.000132		3.25	-5.15e-05		3.25	-0.0002265
3.25333	-0.000122		3.25333	-4.75e-05		3.25333	-0.000222
3.25667	-0.00012		3.25667	-4.45e-05		3.25667	-0.000205
3.26	-0.000124		3.26	-5.5e-05		3.26	-0.0002065
3.26333	-0.00012		3.26333	-5.65e-05		3.26333	-0.0002045
3.26667	-0.000112		3.26667	-4.85e-05		3.26667	-0.000197
3.27	-0.0001025		3.27	-4.75e-05		3.27	-0.0001805
3.27333	-8.6e-05		3.27333	-3.9e-05		3.27333	-0.0001535
3.27667	-6.25e-05		3.27667	-3.65e-05		3.27667	-0.0001285
3.28	-3.7e-05		3.28	-2.8e-05		3.28	-0.000107
3.28333	-1.15e-05		3.28333	-9e-06		3.28333	-7.9e-05
3.28667	1.45e-05		3.28667	5e-06		3.28667	-3.1e-05
3.29	5.8e-05		3.29	2.5e-05		3.29	3.2e-05
3.29333	0.0001275		3.29333	6e-05		3.29333	0.0001
3.29667	0.0002065		3.29667	8.95e-05		3.29667	0.000186
3.3	0.0003015		3.3	0.000117		3.3	0.0002925
3.30333	0.0004225		3.30333	0.000172		3.30333	0.0004285
3.30667	0.0005815		3.30667	0.000243		3.30667	0.0005905
3.31	0.000776		3.31	0.00033		3.31	0.0007825
3.31333	0.0010125		3.31333	0.0004475		3.31333	0.0010295
3.31667	0.0012965		3.31667	0.0005985		3.31667	0.001334
3.32	0.001647		3.32	0.0007795		3.32	0.001698
3.32333	0.002071		3.32333	0.0010035		3.32333	0.0021115
3.32667	0.002553		3.32667	0.00128		3.32667	0.002592
3.33	0.003109		3.33	0.001594		3.33	0.003145
3.33333	0.0037355		3.33333	0.001962		3.33333	0.0037175
3.33667	0.004431		3.33667	0.002391		3.33667	0.0043345
3.34	0.005183		3.34	0.002876		3.34	0.0050075
3.34333	0.0059705		3.34333	0.0033815		3.34333	0.005676
3.34667	0.006778		3.34667	0.0039135		3.34667	0.006335
3.35	0.007585		3.35	0.00449		3.35	0.0069645
3.35333	0.0083905		3.35333	0.005087		3.35333	0.0075475
3.35667	0.0091715		3.35667	0.005675		3.35667	0.0080795
3.36	0.0099125		3.36	0.0062425		3.36	0.008541
3.36333	0.010607		3.36333	0.006787		3.36333	0.008939
3.36667	0.011256		3.36667	0.007289		3.36667	0.009254
3.37	0.0118665		3.37	0.00775		3.37	0.009477
3.37333	0.0124515		3.37333	0.008144		3.37333	0.009597
3.37667	0.012997		3.37667	0.00847		3.37667	0.0096
3.38	0.013485		3.38	0.008751		3.38	0.009506
3.38333	0.0139325		3.38333	0.0089785		3.38333	0.0093015
3.38667	0.0143385		3.38667	0.0091295		3.38667	0.008999
3.39	0.014717		3.39	0.0092075		3.39	0.008626
3.39333	0.015057		3.39333	0.0092495		3.39333	0.008175
3.39667	0.0153735		3.39667	0.009228		3.39667	0.007627
3.4	0.0156845		3.4	0.0091135		3.4	0.0069925
3.40333	0.015959		3.40333	0.0089415		3.40333	0.006309
3.40667	0.0162085		3.40667	0.008718		3.40667	0.005581
3.41	0.01644		3.41	0.008421		3.41	0.004823
3.41333	0.0166435		3.41333	0.008061		3.41333	0.004059
3.41667	0.0168345		3.41667	0.0076615		3.41667	0.0032745
3.42	0.01698		3.42	0.007199		3.42	0.0024795
3.42333	0.0170645		3.42333	0.006685		3.42333	0.0017
3.42667	0.017113		3.42667	0.0061485		3.42667	0.0009545
3.43	0.017109		3.43	0.005569		3.43	0.0002485
3.43333	0.017032		3.43333	0.0049495		3.43333	-0.000435
3.43667	0.0168825		3.43667	0.004302		3.43667	-0.0010675
3.44	0.016656		3.44	0.0036315		3.44	-0.001633
3.44333	0.016345		3.44333	0.0029555		3.44333	-0.002134
3.44667	0.0159485		3.44667	0.0022875		3.44667	-0.002573
3.45	0.0154645		3.45	0.0016335		3.45	-0.0029735
3.45333	0.0149115		3.45333	0.000994		3.45333	-0.003314
3.45667	0.014308		3.45667	0.000374		3.45667	-0.003602
3.46	0.013652		3.46	-0.000214		3.46	-0.003864
3.46333	0.0129565		3.46333	-0.000799		3.46333	-0.0040825
3.46667	0.0122165		3.46667	-0.0013495		3.46667	-0.0042595
3.47	0.011459		3.47	-0.0018275		3.47	-0.0043985
3.47333	0.010706		3.47333	-0.0022565		3.47333	-0.004497
3.47667	0.0099335		3.47667	-0.002647		3.47667	-0.0045845
3.48	0.0091775		3.48	-0.003006		3.48	-0.004648
3.48333	0.0084455		3.48333	-0.0033275		3.48333	-0.004693
3.48667	0.007724		3.48667	-0.0035975		3.48667	-0.0047235
3.49	0.007029		3.49	-0.0038355		3.49	-0.0047165
3.49333	0.006368		3.49333	-0.0040405		3.49333	-0.004688
3.49667	0.005723		3.49667	-0.004217		3.49667	-0.004652
3.5	0.0050995		3.5	-0.004372		3.5	-0.004595
3.50333	0.0045175		3.50333	-0.0044865		3.50333	-0.0045115
3.50667	0.003963		3.50667	-0.004571		3.50667	-0.004425
3.51	0.003439		3.51	-0.0046335		3.51	-0.0043475
3.51333	0.0029495		3.51333	-0.004665		3.51333	-0.0042645
3.51667	0.0024875		3.51667	-0.0046845		3.51667	-0.0041555
3.52	0.002056		3.52	-0.004682		3.52	-0.0040355
3.52333	0.0016665		3.52333	-0.0046615		3.52333	-0.0039175
3.52667	0.001305		3.52667	-0.004639		3.52667	-0.0037975
3.53	0.0009585		3.53	-0.0045935		3.53	-0.0036785
3.53333	0.0006505		3.53333	-0.004525		3.53333	-0.003558
3.53667	0.000373		3.53667	-0.0044395		3.53667	-0.0034265
3.54	0.000105		3.54	-0.004365		3.54	-0.003312
3.54333	-0.000122		3.54333	-0.0042895		3.54333	-0.0032065
3.54667	-0.0003125		3.54667	-0.0041955		3.54667	-0.003084
3.55	-0.000484		3.55	-0.0040905		3.55	-0.0029645
3.55333	-0.0006355		3.55333	-0.0039925		3.55333	-0.00285
3.55667	-0.000776		3.55667	-0.0039025		3.55667	-0.002735
3.56	-0.0008865		3.56	-0.0038075		3.56	-0.002637
3.56333	-0.000968		3.56333	-0.0037115		3.56333	-0.002545
3.56667	-0.001046		3.56667	-0.003627		3.56667	-0.0024455
3.57	-0.0011015		3.57	-0.0035645		3.57	-0.002347
3.57333	-0.0011225		3.57333	-0.003496		3.57333	-0.0022495
3.57667	-0.001139		3.57667	-0.0034165		3.57667	-0.002147
3.58	-0.0011405		3.58	-0.0033395		3.58	-0.0020245
3.58333	-0.00111		3.58333	-0.0032805		3.58333	-0.001884
3.58667	-0.0010405		3.58667	-0.0032275		3.58667	-0.001721
3.59	-0.0009395		3.59	-0.003163		3.59	-0.001546
3.59333	-0.0008145		3.59333	-0.0030825		3.59333	-0.001334
3.59667	-0.000655		3.59667	-0.0029895		3.59667	-0.0010835
3.6	-0.000446		3.6	-0.0028775		3.6	-0.000812
3.60333	-0.0001985		3.60333	-0.002728		3.60333	-0.000516
3.60667	5.65e-05		3.60667	-0.002565		3.60667	-0.000192
3.61	0.00035		3.61	-0.0023795		3.61	0.0001675
3.61333	0.000692		3.61333	-0.002169		3.61333	0.000551
3.61667	0.0010535		3.61667	-0.001937		3.61667	0.0009425
3.62	0.0014285		3.62	-0.0016715		3.62	0.0013515
3.62333	0.0018265		3.62333	-0.001377		3.62333	0.0017645
3.62667	0.0022425		3.62667	-0.0010705		3.62667	0.002148
3.63	0.002664		3.63	-0.0007605		3.63	0.002523
3.63333	0.003084		3.63333	-0.000446		3.63333	0.002894
3.63667	0.003485		3.63667	-0.000125		3.63667	0.0032385
3.64	0.003894		3.64	0.000192		3.64	0.0035435
3.64333	0.0043025		3.64333	0.000496		3.64333	0.003818
3.64667	0.0046835		3.64667	0.0007865		3.64667	0.0040495
3.65	0.005044		3.65	0.0010825		3.65	0.004254
3.65333	0.0053865		3.65333	0.001366		3.65333	0.0044385
3.65667	0.005699		3.65667	0.001605		3.65667	0.0045945
3.66	0.0059675		3.66	0.001821		3.66	0.0047175
3.66333	0.0062255		3.66333	0.0020225		3.66333	0.00479
3.66667	0.0064675		3.66667	0.0021955		3.66667	0.004829
3.67	0.006683		3.67	0.0023375		3.67	0.004859
3.67333	0.006886		3.67333	0.002461		3.67333	0.004863
3.67667	0.0070475		3.67667	0.0025615		3.67667	0.0048165
3.68	0.007187		3.68	0.0026405		3.68	0.004748
3.68333	0.007321		3.68333	0.002698		3.68333	0.004648
3.68667	0.007426		3.68667	0.0027225		3.68667	0.004525
3.69	0.0075105		3.69	0.002737		3.69	0.0043845
3.69333	0.007589		3.69333	0.002741		3.69333	0.0042005
3.69667	0.007647		3.69667	0.002723		3.69667	0.0039835
3.7	0.007685		3.7	0.002682		3.7	0.0037515
3.70333	0.0077225		3.70333	0.002609		3.70333	0.003485
3.70667	0.0077485		3.70667	0.0025185		3.70667	0.003167
3.71	0.007762		3.71	0.002421		3.71	0.002825
3.71333	0.0077995		3.71333	0.002301		3.71333	0.002448
3.71667	0.007844		3.71667	0.002163		3.71667	0.0020185
3.72	0.0078685		3.72	0.0020095		3.72	0.001536
3.72333	0.0079205		3.72333	0.0018325		3.72333	0.0010005
3.72667	0.007975		3.72667	0.0016435		3.72667	0.000425
3.73	0.0080255		3.73	0.0014315		3.73	-0.000193
3.73333	0.0081035		3.73333	0.0011985		3.73333	-0.000844
3.73667	0.0081965		3.73667	0.0009675		3.73667	-0.001506
3.74	0.0083215		3.74	0.000715		3.74	-0.0021325
3.74333	0.0084935		3.74333	0.000444		3.74333	-0.002715
3.74667	0.0087135		3.74667	0.000187		3.74667	-0.003254
3.75	0.0090195		3.75	-8.6e-05		3.75	-0.00372
3.75333	0.0094335		3.75333	-0.000374		3.75333	-0.004123
3.75667	0.0099795		3.75667	-0.000651		3.75667	-0.004438
3.76	0.01073		3.76	-0.0009055		3.76	-0.004659
3.76333	0.011763		3.76333	-0.0011395		3.76333	-0.004802
3.76667	0.013209		3.76667	-0.0013755		3.76667	-0.004867
3.77	0.0152835		3.77	-0.0015915		3.77	-0.004868
3.77333	0.018275		3.77333	-0.001771		3.77333	-0.004788
3.77667	0.0226295		3.77667	-0.001931		3.77667	-0.004639
3.78	0.0291015		3.78	-0.002066		3.78	-0.0044635
3.78333	0.0387975		3.78333	-0.0021685		3.78333	-0.0042605
3.78667	0.0528535		3.78667	-0.002243		3.78667	-0.004044
3.79	0.07134		3.79	-0.0022875		3.79	-0.0038125
3.79333	0.0922025		3.79333	-0.002315		3.79333	-0.003569
3.79667	0.111662		3.79667	-0.002322		3.79667	-0.0033285
3.8	0.126009		3.8	-0.002297		3.8	-0.003086
3.80333	0.133327		3.80333	-0.0022595		3.80333	-0.002856
3.80667	0.133818		3.80667	-0.00221		3.80667	-0.002631
3.81	0.128915		3.81	-0.002136		3.81	-0.002415
3.81333	0.120399		3.81333	-0.0020515		3.81333	-0.0022175
3.81667	0.10991		3.81667	-0.001975		3.81667	-0.0020405
3.82	0.0986975		3.82	-0.001892		3.82	-0.001879
3.82333	0.0876445		3.82333	-0.001793		3.82333	-0.001718
3.82667	0.077285		3.82667	-0.0016875		3.82667	-0.00157
3.83	0.0679415		3.83	-0.001583		3.83	-0.0014205
3.83333	0.0598225		3.83333	-0.001484		3.83333	-0.001286
3.83667	0.0529745		3.83667	-0.0013945		3.83667	-0.001181
3.84	0.047365		3.84	-0.001311		3.84	-0.001088
3.84333	0.0428945		3.84333	-0.001219		3.84333	-0.000997
3.84667	0.0394085		3.84667	-0.001122		3.84667	-0.0009035
3.85	0.036772		3.85	-0.001029		3.85	-0.0008315
3.85333	0.034881		3.85333	-0.000946		3.85333	-0.0007685
3.85667	0.0335935		3.85667	-0.000873		3.85667	-0.000712
3.86	0.032776		3.86	-0.000818		3.86	-0.0006575
3.86333	0.032326		3.86333	-0.000756		3.86333	-0.000588
3.86667	0.032158		3.86667	-0.000687		3.86667	-0.000531
3.87	0.032184		3.87	-0.000633		3.87	-0.000485
3.87333	0.0322985		3.87333	-0.000576		3.87333	-0.000434
3.87667	0.0324475		3.87667	-0.00053		3.87667	-0.0003975
3.88	0.0325615		3.88	-0.0004935		3.88	-0.0003765
3.88333	0.0325695		3.88333	-0.000448		3.88333	-0.0003485
3.88667	0.0324425		3.88667	-0.000406		3.88667	-0.0003175
3.89	0.032149		3.89	-0.0003705		3.89	-0.000291
3.89333	0.0316525		3.89333	-0.000334		3.89333	-0.0002715
3.89667	0.03097		3.89667	-0.0003075		3.89667	-0.0002645
3.9	0.0301345		3.9	-0.0002985		3.9	-0.000244
3.90333	0.0291635		3.90333	-0.0002755		3.90333	-0.000211
3.90667	0.0281015		3.90667	-0.000241		3.90667	-0.000196
3.91	0.026976		3.91	-0.0002245		3.91	-0.0001925
3.91333	0.0258		3.91333	-0.0002105		3.91333	-0.0001905
3.91667	0.0246275		3.91667	-0.000187		3.91667	-0.000176
3.92	0.0234975		3.92	-0.000165		3.92	-0.000175
3.92333	0.022411		3.92333	-0.0001525		3.92333	-0.0001835
3.92667	0.021384		3.92667	-0.0001555		3.92667	-0.0001825
3.93	0.0204415		3.93	-0.000159		3.93	-0.0001805
3.93333	0.019583		3.93333	-0.00015		3.93333	-0.0001715
3.93667	0.018793		3.93667	-0.00014		3.93667	-0.0001675
3.94	0.0180785		3.94	-0.000129		3.94	-0.0001735
3.94333	0.0174355		3.94333	-0.0001155		3.94333	-0.0001835
3.94667	0.0168535		3.94667	-0.0001025		3.94667	-0.0001835
3.95	0.016327		3.95	-9.35e-05		3.95	-0.000188
3.95333	0.015846		3.95333	-0.0001		3.95333	-0.0001955
3.95667	0.015404		3.95667	-0.0001045		3.95667	-0.0001885
3.96	0.014987		3.96	-9e-05		3.96	-0.000185
3.96333	0.014571		3.96333	-8.6e-05		3.96333	-0.0002005
3.96667	0.014176		3.96667	-9.25e-05		3.96667	-0.0002035
3.97	0.013806		3.97	-8.6e-05		3.97	-0.000197
3.97333	0.013446		3.97333	-8.75e-05		3.97333	-0.0002015
3.97667	0.0130945		3.97667	-9.55e-05		3.97667	-0.0002065
3.98	0.012742		3.98	-0.0001005		3.98	-0.0002135
3.98333	0.012379		3.98333	-9.65e-05		3.98333	-0.0001995
3.98667	0.0120165		3.98667	-9.05e-05		3.98667	-0.000198
3.99	0.0116635		3.99	-8.5e-05		3.99	-0.000221
3.99333	0.01131		3.99333	-8e-05		3.99333	-0.000228
3.99667	0.0109565		3.99667	-8.35e-05		3.99667	-0.0002225
4	0.0106115		4	-7.85e-05		4	-0.0002205
4.00333	0.0102765		4.00333	-7.55e-05		4.00333	-0.000227
4.00667	0.0099355		4.00667	-8e-05		4.00667	-0.0002285
4.01	0.009591		4.01	-8e-05		4.01	-0.0002245
4.01333	0.0092575		4.01333	-7.6e-05		4.01333	-0.0002185
4.01667	0.008941		4.01667	-7.2e-05		4.01667	-0.0002115
4.02	0.008638		4.02	-7.75e-05		4.02	-0.000206
4.02333	0.0083415		4.02333	-7.55e-05		4.02333	-0.0002065
4.02667	0.0080545		4.02667	-7.1e-05		4.02667	-0.0002175
4.03	0.007778		4.03	-7.2e-05		4.03	-0.0002165
4.03333	0.0075105		4.03333	-6.6e-05		4.03333	-0.000206
4.03667	0.0072665		4.03667	-6e-05		4.03667	-0.000212
4.04	0.007056		4.04	-5.8e-05		4.04	-0.0002245
4.04333	0.006871		4.04333	-5.65e-05		4.04333	-0.0002185
4.04667	0.006675		4.04667	-6.2e-05		4.04667	-0.0002205
4.05	0.0064805		4.05	-5.8e-05		4.05	-0.000231
4.05333	0.00631		4.05333	-6e-05		4.05333	-0.0002245
4.05667	0.0061525		4.05667	-7.6e-05		4.05667	-0.000218
4.06	0.0060035		4.06	-7.25e-05		4.06	-0.0002185
4.06333	0.0058625		4.06333	-6.55e-05		4.06333	-0.0002245
4.06667	0.005724		4.06667	-5.5e-05		4.06667	-0.000228
4.07	0.0055925		4.07	-5.25e-05		4.07	-0.000232
4.07333	0.005463		4.07333	-6.05e-05		4.07333	-0.0002345
4.07667	0.005322		4.07667	-6e-05		4.07667	-0.0002385
4.08	0.005188		4.08	-5.3e-05		4.08	-0.0002455
4.08333	0.0050595		4.08333	-5e-05		4.08333	-0.00024
4.08667	0.004926		4.08667	-5.05e-05		4.08667	-0.0002325
4.09	0.00479		4.09	-5.05e-05		4.09	-0.000232
4.09333	0.0046665		4.09333	-6.05e-05		4.09333	-0.000244
4.09667	0.004547		4.09667	-6.5e-05		4.09667	-0.000239
4.1	0.0044195		4.1	-6.6e-05		4.1	-0.0002385
4.10333	0.004288		4.10333	-6.3e-05		4.10333	-0.0002505
4.10667	0.004175		4.10667	-5.15e-05		4.10667	-0.0002415
4.11	0.0040775		4.11	-5.95e-05		4.11	-0.000236
4.11333	0.0039575		4.11333	-6.3e-05		4.11333	-0.000241
4.11667	0.003843		4.11667	-4.6e-05		4.11667	-0.0002445
4.12	0.003746		4.12	-4.75e-05		4.12	-0.0002445
4.12333	0.003647		4.12333	-5.55e-05		4.12333	-0.0002485
4.12667	0.003545		4.12667	-5.3e-05		4.12667	-0.000246
4.13	0.0034475		4.13	-4.9e-05		4.13	-0.0002455
4.13333	0.0033625		4.13333	-5.3e-05		4.13333	-0.0002485
4.13667	0.003279		4.13667	-5.85e-05		4.13667	-0.0002525
4.14	0.003203		4.14	-5.75e-05		4.14	-0.000254
4.14333	0.0031325		4.14333	-4.8e-05		4.14333	-0.000251
4.14667	0.003058		4.14667	-3.85e-05		4.14667	-0.000253
4.15	0.002992		4.15	-4.25e-05		4.15	-0.00025
4.15333	0.002931		4.15333	-4.8e-05		4.15333	-0.000251
4.15667	0.002868		4.15667	-4.75e-05		4.15667	-0.0002525
4.16	0.0028085		4.16	-3.85e-05		4.16	-0.000241
4.16333	0.002745		4.16333	-3.8e-05		4.16333	-0.0002395
4.16667	0.002681		4.16667	-5.1e-05		4.16667	-0.0002505
4.17	0.0026275		4.17	-5.95e-05		4.17	-0.0002475
4.17333	0.002584		4.17333	-6.05e-05		4.17333	-0.0002365
4.17667	0.0025455		4.17667	-4.8e-05		4.17667	-0.0002395
4.18	0.002501		4.18	-3.8e-05		4.18	-0.000242
4.18333	0.002463		4.18333	-3e-05		4.18333	-0.000239
4.18667	0.0024305		4.18667	-2.4e-05		4.18667	-0.0002365
4.19	0.002404		4.19	-3.4e-05		4.19	-0.00024
4.19333	0.0023725		4.19333	-3.8e-05		4.19333	-0.000245
4.19667	0.0023315		4.19667	-2.95e-05		4.19667	-0.0002315
4.2	0.0023025		4.2	-2.05e-05		4.2	-0.0002225
4.20333	0.0022795		4.20333	-2.25e-05		4.20333	-0.0002255
4.20667	0.002263		4.20667	-2.9e-05		4.20667	-0.000232
4.21	0.0022455		4.21	-3.15e-05		4.21	-0.0002385
4.21333	0.0022265		4.21333	-2.9e-05		4.21333	-0.000243
4.21667	0.002195		4.21667	-2.95e-05		4.21667	-0.000243
4.22	0.0021785		4.22	-3.85e-05		4.22	-0.0002365
4.22333	0.002178		4.22333	-4e-05		4.22333	-0.0002385
4.22667	0.002163		4.22667	-2.25e-05		4.22667	-0.00024
4.23	0.002148		4.23	-1.65e-05		4.23	-0.0002345
4.23333	0.0021455		4.23333	-2.6e-05		4.23333	-0.0002255
4.23667	0.0021385		4.23667	-2.8e-05		4.23667	-0.0002335
4.24	0.0021185		4.24	-2.25e-05		4.24	-0.000247
4.24333	0.0021035		4.24333	-2e-05		4.24333	-0.000246
4.24667	0.002087		4.24667	-1.65e-05		4.24667	-0.0002445
4.25	0.00206		4.25	-6e-06		4.25	-0.0002425
4.25333	0.002034		4.25333	-4e-06		4.25333	-0.000251
4.25667	0.002029		4.25667	-1.4e-05		4.25667	-0.0002535
4.26	0.002017		4.26	-1.65e-05		4.26	-0.0002475
4.26333	0.002002		4.26333	-5e-07		4.26333	-0.0002475
4.26667	0.0019835		4.26667	3.5e-06		4.26667	-0.000253
4.27	0.0019595		4.27	-4e-06		4.27	-0.0002555
4.27333	0.0019375		4.27333	-3.5e-06		4.27333	-0.0002535
4.27667	0.001912		4.27667	5e-06		4.27667	-0.000251
4.28	0.0018965		4.28	1.5e-05		4.28	-0.0002515
4.28333	0.0018705		4.28333	1.85e-05		4.28333	-0.000257
4.28667	0.001839		4.28667	2.35e-05		4.28667	-0.0002615
4.29	0.0018205		4.29	2.15e-05		4.29	-0.0002615
4.29333	0.001806		4.29333	1.7e-05		4.29333	-0.000263
4.29667	0.0017835		4.29667	2.1e-05		4.29667	-0.00027
4.3	0.001764		4.3	3.6e-05		4.3	-0.0002695
4.30333	0.0017415		4.30333	4.35e-05		4.30333	-0.0002705
4.30667	0.0017235		4.30667	4.3e-05		4.30667	-0.000276
4.31	0.001707		4.31	5.35e-05		4.31	-0.000271
4.31333	0.0016875		4.31333	6.3e-05		4.31333	-0.00026
4.31667	0.001669		4.31667	6.65e-05		4.31667	-0.000256
4.32	0.0016405		4.32	7.05e-05		4.32	-0.000259
4.32333	0.0016265		4.32333	6.85e-05		4.32333	-0.000261
4.32667	0.001618		4.32667	7.75e-05		4.32667	-0.0002615
4.33	0.001612		4.33	9.9e-05		4.33	-0.0002555
4.33333	0.0016145		4.33333	0.000112		4.33333	-0.0002545
4.33667	0.001603		4.33667	0.0001255		4.33667	-0.0002645
4.34	0.001585		4.34	0.0001395		4.34	-0.000266
4.34333	0.0015795		4.34333	0.0001505		4.34333	-0.0002745
4.34667	0.0015755		4.34667	0.000151		4.34667	-0.0002715
4.35	0.001555		4.35	0.0001625		4.35	-0.000265
4.35333	0.0015375		4.35333	0.000183		4.35333	-0.000263
4.35667	0.0015355		4.35667	0.000191		4.35667	-0.00026
4.36	0.0015275		4.36	0.0002025		4.36	-0.0002695
4.36333	0.0015125		4.36333	0.000216		4.36333	-0.0002735
4.36667	0.0014925		4.36667	0.000236		4.36667	-0.000276
4.37	0.001479		4.37	0.0002555		4.37	-0.000281
4.37333	0.0014765		4.37333	0.000267		4.37333	-0.0002775
4.37667	0.0014655		4.37667	0.0002835		4.37667	-0.000282
4.38	0.001445		4.38	0.0002985		4.38	-0.000287
4.38333	0.001437		4.38333	0.0003065		4.38333	-0.000275
4.38667	0.001428		4.38667	0.000319		4.38667	-0.000268
4.39	0.001411		4.39	0.000334		4.39	-0.000262
4.39333	0.0013985		4.39333	0.0003495		4.39333	-0.0002565
4.39667	0.00138		4.39667	0.000351		4.39667	-0.0002695
4.4	0.0013655		4.4	0.0003415		4.4	-0.0002855
4.40333	0.0013535		4.40333	0.0003495		4.40333	-0.0002835
4.40667	0.0013345		4.40667	0.0003565		4.40667	-0.0002795
4.41	0.001324		4.41	0.000362		4.41	-0.000277
4.41333	0.0013125		4.41333	0.000363		4.41333	-0.000269
4.41667	0.0012905		4.41667	0.0003535		4.41667	-0.0002695
4.42	0.0012785		4.42	0.000341		4.42	-0.0002615
4.42333	0.0012625		4.42333	0.000339		4.42333	-0.0002605
4.42667	0.001247		4.42667	0.0003495		4.42667	-0.0002815
4.43	0.001245		4.43	0.000344		4.43	-0.00029
4.43333	0.001228		4.43333	0.000326		4.43333	-0.00029
4.43667	0.0012125		4.43667	0.000314		4.43667	-0.0002835
4.44	0.001207		4.44	0.0003045		4.44	-0.0002745
4.44333	0.001202		4.44333	0.0002905		4.44333	-0.0002835
4.44667	0.001202		4.44667	0.0002725		4.44667	-0.000288
4.45	0.00119		4.45	0.0002625		4.45	-0.0002825
4.45333	0.0011725		4.45333	0.0002575		4.45333	-0.0002785
4.45667	0.0011575		4.45667	0.000253		4.45667	-0.0002765
4.46	0.001146		4.46	0.000245		4.46	-0.0002775
4.46333	0.0011465		4.46333	0.0002245		4.46333	-0.0002725
4.46667	0.001141		4.46667	0.0002085		4.46667	-0.0002695
4.47	0.0011245		4.47	0.0001945		4.47	-0.000273
4.47333	0.00111		4.47333	0.0001765		4.47333	-0.000272
4.47667	0.0011075		4.47667	0.0001645		4.47667	-0.000271
4.48	0.0011		4.48	0.000161		4.48	-0.0002775
4.48333	0.0010935		4.48333	0.000159		4.48333	-0.0002725
4.48667	0.0010815		4.48667	0.000146		4.48667	-0.0002855
4.49	0.0010535		4.49	0.000124		4.49	-0.0003055
4.49333	0.0010385		4.49333	0.000122		4.49333	-0.0002935
4.49667	0.001039		4.49667	0.0001205		4.49667	-0.0002775
4.5	0.0010475		4.5	0.0001065		4.5	-0.000276
4.50333	0.0010365		4.50333	0.0001005		4.50333	-0.0002765
4.50667	0.001016		4.50667	8.7e-05		4.50667	-0.0002725
4.51	0.0010075		4.51	6.55e-05		4.51	-0.000275
4.51333	0.0010015		4.51333	5.35e-05		4.51333	-0.000278
4.51667	0.00099		4.51667	4.8e-05		4.51667	-0.0002835
4.52	0.000976		4.52	4.65e-05		4.52	-0.0002725
4.52333	0.000964		4.52333	3.25e-05		4.52333	-0.0002685
4.52667	0.000958		4.52667	1.4e-05		4.52667	-0.000283
4.53	0.000956		4.53	1.2e-05		4.53	-0.0002745
4.53333	0.0009405		4.53333	1.9e-05		4.53333	-0.0002715
4.53667	0.000932		4.53667	5e-06		4.53667	-0.0002875
4.54	0.0009285		4.54	-8e-06		4.54	-0.00029
4.54333	0.0009195		4.54333	-4e-06		4.54333	-0.0002915
4.54667	0.0009085		4.54667	-1.5e-06		4.54667	-0.0002915
4.55	0.0008915		4.55	-9e-06		4.55	-0.000289
4.55333	0.0008785		4.55333	-1.55e-05		4.55333	-0.000298
4.55667	0.0008795		4.55667	-1.5e-05		4.55667	-0.0002945
4.56	0.00088		4.56	-1.55e-05		4.56	-0.000284
4.56333	0.00088		4.56333	-2.3e-05		4.56333	-0.0002825
4.56667	0.000878		4.56667	-4.2e-05		4.56667	-0.000281
4.57	0.000871		4.57	-4.85e-05		4.57	-0.000287
4.57333	0.0008635		4.57333	-4.5e-05		4.57333	-0.000288
4.57667	0.0008485		4.57667	-4.55e-05		4.57667	-0.000277
4.58	0.000841		4.58	-3.75e-05		4.58	-0.000275
4.58333	0.000847		4.58333	-3.55e-05		4.58333	-0.000282
4.58667	0.0008525		4.58667	-5.1e-05		4.58667	-0.000291
4.59	0.000839		4.59	-5.05e-05		4.59	-0.000298
4.59333	0.0008195		4.59333	-4.95e-05		4.59333	-0.0003
4.59667	0.0008125		4.59667	-5.55e-05		4.59667	-0.0003005
4.6	0.0008095		4.6	-6.4e-05		4.6	-0.000295
4.60333	0.0008165		4.60333	-6.55e-05		4.60333	-0.00029
4.60667	0.0008215		4.60667	-6.45e-05		4.60667	-0.000295
4.61	0.0008165		4.61	-7.4e-05		4.61	-0.0002985
4.61333	0.0008085		4.61333	-7.55e-05		4.61333	-0.0002965
4.61667	0.000798		4.61667	-7.8e-05		4.61667	-0.0002985
4.62	0.0008085		4.62	-7.3e-05		4.62	-0.0003035
4.62333	0.0008145		4.62333	-7.65e-05		4.62333	-0.0002965
4.62667	0.0008025		4.62667	-8.75e-05		4.62667	-0.0002815
4.63	0.0008035		4.63	-8.45e-05		4.63	-0.000292
4.63333	0.0008065		4.63333	-8.15e-05		4.63333	-0.000303
4.63667	0.000805		4.63667	-7.05e-05		4.63667	-0.000294
4.64	0.000814		4.64	-7.4e-05		4.64	-0.000295
4.64333	0.0008155		4.64333	-9.05e-05		4.64333	-0.0002955
4.64667	0.0008115		4.64667	-9.45e-05		4.64667	-0.0002845
4.65	0.000802		4.65	-0.0001005		4.65	-0.000283
4.65333	0.0007895		4.65333	-9.55e-05		4.65333	-0.000286
4.65667	0.0007895		4.65667	-8.4e-05		4.65667	-0.000286
4.66	0.0007865		4.66	-8.6e-05		4.66	-0.000289
4.66333	0.0007845		4.66333	-9.5e-05		4.66333	-0.0002905
4.66667	0.000785		4.66667	-0.0001015		4.66667	-0.000297
4.67	0.000777		4.67	-9.9e-05		4.67	-0.000299
4.67333	0.000768		4.67333	-9.45e-05		4.67333	-0.000288
4.67667	0.000769		4.67667	-9.25e-05		4.67667	-0.00028
4.68	0.0007615		4.68	-9.55e-05		4.68	-0.000279
4.68333	0.0007435		4.68333	-9.9e-05		4.68333	-0.000282
4.68667	0.0007455		4.68667	-9.6e-05		4.68667	-0.000289
4.69	0.000755		4.69	-9.85e-05		4.69	-0.00029
4.69333	0.000744		4.69333	-0.000103		4.69333	-0.0002875
4.69667	0.0007335		4.69667	-0.000102		4.69667	-0.000284
4.7	0.00073		4.7	-0.000101		4.7	-0.000295
4.70333	0.0007295		4.70333	-9.15e-05		4.70333	-0.000297
4.70667	0.0007235		4.70667	-8.6e-05		4.70667	-0.0002805
4.71	0.00072		4.71	-9.4e-05		4.71	-0.000286
4.71333	0.000718		4.71333	-9.65e-05		4.71333	-0.000297
4.71667	0.0007105		4.71667	-9.1e-05		4.71667	-0.000295
4.72	0.000711		4.72	-8.65e-05		4.72	-0.0002895
4.72333	0.0007225		4.72333	-9.05e-05		4.72333	-0.0002865
4.72667	0.0007305		4.72667	-8.85e-05		4.72667	-0.0002885
4.73	0.0007125		4.73	-8.85e-05		4.73	-0.0002805
4.73333	0.000692		4.73333	-9.7e-05		4.73333	-0.000277
4.73667	0.0006885		4.73667	-0.000104		4.73667	-0.000289
4.74	0.00069		4.74	-0.0001055		4.74	-0.0002915
4.74333	0.0006865		4.74333	-9.85e-05		4.74333	-0.000289
4.74667	0.000682		4.74667	-0.0001035		4.74667	-0.000301
4.75	0.0006795		4.75	-0.000117		4.75	-0.0003075
4.75333	0.000683		4.75333	-0.00011		4.75333	-0.0002965
4.75667	0.000686		4.75667	-0.0001		4.75667	-0.0002905
4.76	0.0006855		4.76	-9.5e-05		4.76	-0.0002925
4.76333	0.000695		4.76333	-9.85e-05		4.76333	-0.000288
4.76667	0.000695		4.76667	-0.000105		4.76667	-0.0002835
4.77	0.0006785		4.77	-9.55e-05		4.77	-0.0002945
4.77333	0.000672		4.77333	-9.25e-05		4.77333	-0.000308
4.77667	0.0006775		4.77667	-9.8e-05		4.77667	-0.000315
4.78	0.0006775		4.78	-0.0001035		4.78	-0.0003065
4.78333	0.000676		4.78333	-0.000107		4.78333	-0.0003055
4.78667	0.0006775		4.78667	-0.0001105		4.78667	-0.0003065
4.79	0.0006755		4.79	-0.0001015		4.79	-0.000296
4.79333	0.0006625		4.79333	-9.8e-05		4.79333	-0.000297
4.79667	0.0006575		4.79667	-0.000104		4.79667	-0.0002915
4.8	0.0006745		4.8	-0.000102		4.8	-0.000293
4.80333	0.0006775		4.80333	-0.000103		4.80333	-0.0003155
4.80667	0.0006605		4.80667	-9.7e-05		4.80667	-0.000315
4.81	0.0006585		4.81	-9.55e-05		4.81	-0.0002935
4.81333	0.000672		4.81333	-0.0001055		4.81333	-0.0002875
4.81667	0.000675		4.81667	-0.0001175		4.81667	-0.000288
4.82	0.000671		4.82	-0.0001165		4.82	-0.000292
4.82333	0.000663		4.82333	-0.0001095		4.82333	-0.000305
4.82667	0.0006695		4.82667	-0.0001045		4.82667	-0.000304
4.83	0.000674		4.83	-9.9e-05		4.83	-0.0002945
4.83333	0.000666		4.83333	-0.0001035		4.83333	-0.0002955
4.83667	0.0006665		4.83667	-0.000106		4.83667	-0.0002985
4.84	0.00067		4.84	-0.000105		4.84	-0.000301
4.84333	0.0006715		4.84333	-0.0001115		4.84333	-0.0002975
4.84667	0.0006635		4.84667	-0.0001225		4.84667	-0.000301
4.85	0.000661		4.85	-0.0001215		4.85	-0.000302
4.85333	0.0006585		4.85333	-0.000106		4.85333	-0.000297
4.85667	0.0006565		4.85667	-0.000112		4.85667	-0.0002975
4.86	0.000658		4.86	-0.0001205		4.86	-0.00029
4.86333	0.0006555		4.86333	-0.0001195		4.86333	-0.000295
4.86667	0.000662		4.86667	-0.0001275		4.86667	-0.0003145
4.87	0.000662		4.87	-0.000115		4.87	-0.000324
4.87333	0.0006525		4.87333	-0.000105		4.87333	-0.000313
4.87667	0.000642		4.87667	-0.000116		4.87667	-0.000297
4.88	0.000627		4.88	-0.0001125		4.88	-0.0002925
4.88333	0.000625		4.88333	-0.0001125		4.88333	-0.0002915
4.88667	0.000633		4.88667	-0.0001315		4.88667	-0.000295
4.89	0.00063		4.89	-0.0001355		4.89	-0.000299
4.89333	0.000624		4.89333	-0.000128		4.89333	-0.0003015
4.89667	0.000633		4.89667	-0.0001205		4.89667	-0.0002965
4.9	0.000635		4.9	-0.0001095		4.9	-0.000292
4.90333	0.00063		4.90333	-0.0001165		4.90333	-0.000297
4.90667	0.000625		4.90667	-0.000125		4.90667	-0.0003
4.91	0.0006225		4.91	-0.0001235		4.91	-0.0003035
4.91333	0.000634		4.91333	-0.0001245		4.91333	-0.0003125
4.91667	0.0006375		4.91667	-0.000126		4.91667	-0.000307
4.92	0.000629		4.92	-0.000124		4.92	-0.0002975
4.92333	0.000634		4.92333	-0.00012		4.92333	-0.000304
4.92667	0.000636		4.92667	-0.000125		4.92667	-0.0003125
4.93	0.0006205		4.93	-0.000141		4.93	-0.0003185
4.93333	0.000624		4.93333	-0.000134		4.93333	-0.000325
4.93667	0.000626		4.93667	-0.000117		4.93667	-0.000324
4.94	0.0006255		4.94	-0.0001315		4.94	-0.000311
4.94333	0.000641		4.94333	-0.0001415		4.94333	-0.000306
4.94667	0.0006395		4.94667	-0.000141		4.94667	-0.00031
4.95	0.0006285		4.95	-0.0001395		4.95	-0.0003125
4.95333	0.000643		4.95333	-0.000139		4.95333	-0.0003155
4.95667	0.0006615		4.95667	-0.0001435		4.95667	-0.000317
4.96	0.000652		4.96	-0.000141		4.96	-0.000312
4.96333	0.000635		4.96333	-0.0001455		4.96333	-0.000306
4.96667	0.000643		4.96667	-0.0001475		4.96667	-0.0003035
4.97	0.0006505		4.97	-0.0001365		4.97	-0.0002945
4.97333	0.0006525		4.97333	-0.0001245		4.97333	-0.000301
4.97667	0.000673		4.97667	-0.0001225		4.97667	-0.000309
4.98	0.000683		4.98	-0.0001175		4.98	-0.000313
4.98333	0.000672		4.98333	-0.0001105		4.98333	-0.0003235
4.98667	0.000662		4.98667	-0.0001205		4.98667	-0.0003245
4.99	0.0006615		4.99	-0.0001285		4.99	-0.0003185
4.99333	0.000659		4.99333	-0.0001275		4.99333	-0.0003135
4.99667	0.0006565		4.99667	-0.0001245		4.99667	-0.000323
5	0.0006635		5	-0.0001185		5	-0.0003175
5.00333	0.000662		5.00333	-0.000128		5.00333	-0.000301
5.00667	0.0006485		5.00667	-0.0001415		5.00667	-0.000307
5.01	0.000649		5.01	-0.0001295		5.01	-0.0003185
5.01333	0.000656		5.01333	-0.0001215		5.01333	-0.0003085
5.01667	0.000651		5.01667	-0.0001275		5.01667	-0.000301
5.02	0.0006475		5.02	-0.0001245		5.02	-0.00032
5.02333	0.000647		5.02333	-0.0001285		5.02333	-0.0003255
5.02667	0.0006435		5.02667	-0.0001305		5.02667	-0.000319
5.03	0.000641		5.03	-0.0001245		5.03	-0.000315
5.03333	0.000645		5.03333	-0.00013		5.03333	-0.000318
5.03667	0.0006485		5.03667	-0.0001315		5.03667	-0.0003305
5.04	0.0006355		5.04	-0.000126		5.04	-0.00033
5.04333	0.0006155		5.04333	-0.0001195		5.04333	-0.0003295
5.04667	0.0006135		5.04667	-0.000113		5.04667	-0.000337
5.05	0.000617		5.05	-0.000117		5.05	-0.0003305
5.05333	0.000617		5.05333	-0.0001235		5.05333	-0.0003175
5.05667	0.000616		5.05667	-0.000126		5.05667	-0.000317
5.06	0.000611		5.06	-0.000135		5.06	-0.0003155
5.06333	0.0006115		5.06333	-0.0001435		5.06333	-0.0003105
5.06667	0.0006055		5.06667	-0.0001355		5.06667	-0.0003115
5.07	0.0005995		5.07	-0.000123		5.07	-0.0003075
5.07333	0.0005985		5.07333	-0.00013		5.07333	-0.0002975
5.07667	0.000587		5.07667	-0.0001365		5.07667	-0.0003005
5.08	0.0005785		5.08	-0.0001375		5.08	-0.0003075
5.08333	0.00058		5.08333	-0.00014		5.08333	-0.000317
5.08667	0.0005805		5.08667	-0.0001335		5.08667	-0.0003265
5.09	0.00057		5.09	-0.00013		5.09	-0.00033
5.09333	0.000564		5.09333	-0.0001265		5.09333	-0.0003295
5.09667	0.000561		5.09667	-0.0001245		5.09667	-0.00032
5.1	0.000558		5.1	-0.000136		5.1	-0.00031
5.10333	0.0005585		5.10333	-0.0001355		5.10333	-0.0003125
5.10667	0.000563		5.10667	-0.000126		5.10667	-0.000318
5.11	0.000565		5.11	-0.000127		5.11	-0.000315
5.11333	0.0005565		5.11333	-0.0001365		5.11333	-0.000314
5.11667	0.0005365		5.11667	-0.000139		5.11667	-0.000316
5.12	0.0005305		5.12	-0.000138		5.12	-0.0003145
5.12333	0.000552		5.12333	-0.000142		5.12333	-0.0003205
5.12667	0.0005515		5.12667	-0.0001435		5.12667	-0.000323
5.13	0.0005395		5.13	-0.0001425		5.13	-0.0003195
5.13333	0.000536		5.13333	-0.0001385		5.13333	-0.000327
5.13667	0.0005375		5.13667	-0.000137		5.13667	-0.0003325
5.14	0.0005435		5.14	-0.000137		5.14	-0.000329
5.14333	0.000548		5.14333	-0.000147		5.14333	-0.00033
5.14667	0.0005465		5.14667	-0.000148		5.14667	-0.000327
5.15	0.00054		5.15	-0.000142		5.15	-0.000315
5.15333	0.0005345		5.15333	-0.0001385		5.15333	-0.0003095
5.15667	0.000539		5.15667	-0.00014		5.15667	-0.0003165
5.16	0.000543		5.16	-0.000149		5.16	-0.000321
5.16333	0.000543		5.16333	-0.00014		5.16333	-0.000321
5.16667	0.0005365		5.16667	-0.000128		5.16667	-0.0003225
5.17	0.0005285		5.17	-0.000136		5.17	-0.000323
5.17333	0.0005375		5.17333	-0.000143		5.17333	-0.0003245
5.17667	0.000549		5.17667	-0.0001345		5.17667	-0.0003235
5.18	0.0005495		5.18	-0.0001385		5.18	-0.000321
5.18333	0.0005395		5.18333	-0.0001445		5.18333	-0.0003275
5.18667	0.000536		5.18667	-0.0001375		5.18667	-0.000331
5.19	0.0005385		5.19	-0.000138		5.19	-0.000326
5.19333	0.000528		5.19333	-0.0001385		5.19333	-0.000316
5.19667	0.0005135		5.19667	-0.0001385		5.19667	-0.000306
5.2	0.00052		5.2	-0.000135		5.2	-0.0003075
5.20333	0.0005315		5.20333	-0.00014		5.20333	-0.0003125
5.20667	0.000531		5.20667	-0.0001495		5.20667	-0.0003165
5.21	0.000526		5.21	-0.000151		5.21	-0.0003075
5.21333	0.000527		5.21333	-0.000147		5.21333	-0.00031
5.21667	0.000525		5.21667	-0.0001435		5.21667	-0.000315
5.22	0.000512		5.22	-0.00014		5.22	-0.0003165
5.22333	0.000501		5.22333	-0.00014		5.22333	-0.0003205
5.22667	0.0005025		5.22667	-0.000135		5.22667	-0.000314
5.23	0.000511		5.23	-0.0001235		5.23	-0.000323
5.23333	0.000497		5.23333	-0.000137		5.23333	-0.0003315
5.23667	0.000485		5.23667	-0.000153		5.23667	-0.0003275
5.24	0.000486		5.24	-0.0001485		5.24	-0.000325
5.24333	0.0004755		5.24333	-0.000144		5.24333	-0.0003205
5.24667	0.000467		5.24667	-0.000146		5.24667	-0.000323
5.25	0.000456		5.25	-0.000149		5.25	-0.000312
5.25333	0.000452		5.25333	-0.0001545		5.25333	-0.0003095
5.25667	0.000466		5.25667	-0.000154		5.25667	-0.000315
5.26	0.0004705		5.26	-0.000149		5.26	-0.0003165
5.26333	0.000461		5.26333	-0.000137		5.26333	-0.0003285
5.26667	0.000455		5.26667	-0.00013		5.26667	-0.0003255
5.27	0.000449		5.27	-0.0001355		5.27	-0.0003255
5.27333	0.0004395		5.27333	-0.000128		5.27333	-0.000337
5.27667	0.0004395		5.27667	-0.000126		5.27667	-0.000331
5.28	0.0004465		5.28	-0.000134		5.28	-0.0003185
5.28333	0.000439		5.28333	-0.0001395		5.28333	-0.0003175
5.28667	0.000426		5.28667	-0.0001375		5.28667	-0.0003255
5.29	0.0004285		5.29	-0.00014		5.29	-0.0003325
5.29333	0.0004345		5.29333	-0.0001515		5.29333	-0.000329
5.29667	0.0004315		5.29667	-0.000155		5.29667	-0.0003245
5.3	0.0004185		5.3	-0.0001455		5.3	-0.00032
5.30333	0.0004125		5.30333	-0.000129		5.30333	-0.0003245
5.30667	0.000425		5.30667	-0.000135		5.30667	-0.000331
5.31	0.0004375		5.31	-0.000155		5.31	-0.000324
5.31333	0.000439		5.31333	-0.000152		5.31333	-0.0003175
5.31667	0.000435		5.31667	-0.000138		5.31667	-0.000315
5.32	0.000422		5.32	-0.000127		5.32	-0.000312
5.32333	0.000421		5.32333	-0.0001395		5.32333	-0.00031
5.32667	0.0004225		5.32667	-0.000157		5.32667	-0.0003175
5.33	0.0004135		5.33	-0.000155		5.33	-0.000334
5.33333	0.000411		5.33333	-0.000148		5.33333	-0.0003355
5.33667	0.0004155		5.33667	-0.0001425		5.33667	-0.000328
5.34	0.0004185		5.34	-0.0001375		5.34	-0.000327
5.34333	0.000404		5.34333	-0.0001445		5.34333	-0.0003275
5.34667	0.0003865		5.34667	-0.00015		5.34667	-0.00033
5.35	0.0003965		5.35	-0.0001465		5.35	-0.0003315
5.35333	0.000415		5.35333	-0.000145		5.35333	-0.0003175
5.35667	0.000421		5.35667	-0.000137		5.35667	-0.0003065
5.36	0.000414		5.36	-0.000138		5.36	-0.0003115
5.36333	0.0004045		5.36333	-0.0001505		5.36333	-0.000323
5.36667	0.0004065		5.36667	-0.0001505		5.36667	-0.0003355
5.37	0.000404		5.37	-0.00014		5.37	-0.000322
5.37333	0.0004035		5.37333	-0.0001405		5.37333	-0.000317
5.37667	0.0004		5.37667	-0.000144		5.37667	-0.0003295
5.38	0.0003905		5.38	-0.000147		5.38	-0.0003275
5.38333	0.0003975		5.38333	-0.000144		5.38333	-0.000325
5.38667	0.000407		5.38667	-0.000141		5.38667	-0.0003365
5.39	0.000392		5.39	-0.0001465		5.39	-0.0003385
5.39333	0.0003825		5.39333	-0.0001525		5.39333	-0.000332
5.39667	0.000392		5.39667	-0.000147		5.39667	-0.0003345
5.4	0.000397		5.4	-0.000137		5.4	-0.0003315
5.40333	0.000393		5.40333	-0.000137		5.40333	-0.000321
5.40667	0.000387		5.40667	-0.0001445		5.40667	-0.000331
5.41	0.0003925		5.41	-0.000153		5.41	-0.000349
5.41333	0.000397		5.41333	-0.000152		5.41333	-0.00034
5.41667	0.000394		5.41667	-0.0001505		5.41667	-0.000333
5.42	0.0003965		5.42	-0.000152		5.42	-0.00034
5.42333	0.0003965		5.42333	-0.000143		5.42333	-0.0003365
5.42667	0.0003935		5.42667	-0.0001365		5.42667	-0.000332
5.43	0.0003995		5.43	-0.00014		5.43	-0.0003355
5.43333	0.00039		5.43333	-0.0001475		5.43333	-0.0003355
5.43667	0.000388		5.43667	-0.0001445		5.43667	-0.0003355
5.44	0.000409		5.44	-0.000151		5.44	-0.000336
5.44333	0.000406		5.44333	-0.000165		5.44333	-0.000329
5.44667	0.0003995		5.44667	-0.000158		5.44667	-0.000335
5.45	0.000398		5.45	-0.0001495		5.45	-0.0003385
5.45333	0.0004005		5.45333	-0.000151		5.45333	-0.0003315
5.45667	0.0004055		5.45667	-0.0001545		5.45667	-0.0003365
5.46	0.0004135		5.46	-0.0001515		5.46	-0.0003315
5.46333	0.000423		5.46333	-0.0001445		5.46333	-0.000324
5.46667	0.0004165		5.46667	-0.0001535		5.46667	-0.000332
5.47	0.0004155		5.47	-0.0001585		5.47	-0.0003405
5.47333	0.000424		5.47333	-0.000157		5.47333	-0.000346
5.47667	0.0004195		5.47667	-0.0001545		5.47667	-0.0003465
5.48	0.0004075		5.48	-0.000144		5.48	-0.0003415
5.48333	0.000401		5.48333	-0.0001345		5.48333	-0.000326
5.48667	0.0004045		5.48667	-0.000136		5.48667	-0.000313
5.49	0.0004125		5.49	-0.0001395		5.49	-0.0003245
5.49333	0.000407		5.49333	-0.0001455		5.49333	-0.0003365
5.49667	0.0004085		5.49667	-0.000154		5.49667	-0.0003395
5.5	0.000408		5.5	-0.000155		5.5	-0.0003335
5.50333	0.000405		5.50333	-0.0001505		5.50333	-0.000331
5.50667	0.0004145		5.50667	-0.0001505		5.50667	-0.000329
5.51	0.000412		5.51	-0.00016		5.51	-0.000325
5.51333	0.0004085		5.51333	-0.0001605		5.51333	-0.0003325
5.51667	0.0004155		5.51667	-0.0001575		5.51667	-0.000339
5.52	0.0004225		5.52	-0.0001595		5.52	-0.000338
5.52333	0.0004215		5.52333	-0.00016		5.52333	-0.000334
5.52667	0.0004135		5.52667	-0.0001535		5.52667	-0.000334
5.53	0.000417		5.53	-0.0001475		5.53	-0.0003415
5.53333	0.0004255		5.53333	-0.0001555		5.53333	-0.000346
5.53667	0.0004255		5.53667	-0.0001535		5.53667	-0.0003445
5.54	0.0004165		5.54	-0.0001385		5.54	-0.000332
5.54333	0.0004155		5.54333	-0.000148		5.54333	-0.0003215
5.54667	0.0004255		5.54667	-0.0001585		5.54667	-0.000328
5.55	0.00043		5.55	-0.000158		5.55	-0.0003335
5.55333	0.0004325		5.55333	-0.000161		5.55333	-0.000333
5.55667	0.0004345		5.55667	-0.0001615		5.55667	-0.000328
5.56	0.0004285		5.56	-0.0001595		5.56	-0.0003295
5.56333	0.000421		5.56333	-0.000152		5.56333	-0.0003335
5.56667	0.000416		5.56667	-0.0001465		5.56667	-0.000326
5.57	0.000418		5.57	-0.000143		5.57	-0.000337
5.57333	0.0004215		5.57333	-0.0001475		5.57333	-0.000342
5.57667	0.0004145		5.57667	-0.000164		5.57667	-0.000335
5.58	0.00042		5.58	-0.0001705		5.58	-0.000337
5.58333	0.0004305		5.58333	-0.0001655		5.58333	-0.0003355
5.58667	0.000427		5.58667	-0.000151		5.58667	-0.0003355
5.59	0.000434		5.59	-0.000136		5.59	-0.000342
5.59333	0.00044		5.59333	-0.0001445		5.59333	-0.000339
5.59667	0.000427		5.59667	-0.0001545		5.59667	-0.0003385
5.6	0.0004225		5.6	-0.0001555		5.6	-0.0003475
5.60333	0.0004135		5.60333	-0.0001535		5.60333	-0.000348
5.60667	0.000415		5.60667	-0.000152		5.60667	-0.0003475
5.61	0.0004375		5.61	-0.0001515		5.61	-0.000348
5.61333	0.000444		5.61333	-0.000151		5.61333	-0.000344
5.61667	0.0004495		5.61667	-0.0001575		5.61667	-0.0003435
5.62	0.0004535		5.62	-0.0001575		5.62	-0.000345
5.62333	0.000448		5.62333	-0.000147		5.62333	-0.0003305
5.62667	0.0004535		5.62667	-0.0001435		5.62667	-0.0003235
5.63	0.0004605		5.63	-0.000152		5.63	-0.000335
5.63333	0.0004635		5.63333	-0.000147		5.63333	-0.0003375
5.63667	0.000458		5.63667	-0.000147		5.63667	-0.0003315
5.64	0.0004605		5.64	-0.0001645		5.64	-0.000333
5.64333	0.000463		5.64333	-0.000168		5.64333	-0.0003335
5.64667	0.000468		5.64667	-0.000169		5.64667	-0.0003355
5.65	0.0004755		5.65	-0.000168		5.65	-0.0003495
5.65333	0.0004785		5.65333	-0.0001575		5.65333	-0.0003525
5.65667	0.0004895		5.65667	-0.0001625		5.65667	-0.0003325
5.66	0.000493		5.66	-0.0001685		5.66	-0.0003265
5.66333	0.000495		5.66333	-0.0001685		5.66333	-0.000336
5.66667	0.0004945		5.66667	-0.000175		5.66667	-0.000344
5.67	0.000498		5.67	-0.0001715		5.67	-0.0003435
5.67333	0.000502		5.67333	-0.000163		5.67333	-0.000335
5.67667	0.0004985		5.67667	-0.000156		5.67667	-0.000341
5.68	0.0004995		5.68	-0.0001545		5.68	-0.000344
5.68333	0.000503		5.68333	-0.000159		5.68333	-0.0003345
5.68667	0.000501		5.68667	-0.0001705		5.68667	-0.0003365
5.69	0.0005045		5.69	-0.0001705		5.69	-0.0003405
5.69333	0.0005055		5.69333	-0.000164		5.69333	-0.000342
5.69667	0.0005005		5.69667	-0.0001645		5.69667	-0.000337
5.7	0.0004975		5.7	-0.0001625		5.7	-0.00033
5.70333	0.0005		5.70333	-0.000153		5.70333	-0.000338
5.70667	0.0005065		5.70667	-0.000148		5.70667	-0.0003465
5.71	0.0004975		5.71	-0.0001505		5.71	-0.000348
5.71333	0.000482		5.71333	-0.0001645		5.71333	-0.000353
5.71667	0.0004815		5.71667	-0.000168		5.71667	-0.0003575
5.72	0.0004915		5.72	-0.000162		5.72	-0.000351
5.72333	0.0004975		5.72333	-0.0001575		5.72333	-0.0003435
5.72667	0.0005005		5.72667	-0.0001485		5.72667	-0.0003455
5.73	0.0004915		5.73	-0.000153		5.73	-0.000342
5.73333	0.0004795		5.73333	-0.000157		5.73333	-0.000337
5.73667	0.000483		5.73667	-0.0001745		5.73667	-0.000344
5.74	0.000486		5.74	-0.000189		5.74	-0.000345
5.74333	0.000472		5.74333	-0.000175		5.74333	-0.000351
5.74667	0.00046		5.74667	-0.000164		5.74667	-0.00036
5.75	0.00047		5.75	-0.000169		5.75	-0.00035
5.75333	0.000474		5.75333	-0.0001745		5.75333	-0.000342
5.75667	0.0004535		5.75667	-0.000169		5.75667	-0.000351
5.76	0.00044		5.76	-0.0001645		5.76	-0.000351
5.76333	0.00045		5.76333	-0.000165		5.76333	-0.000345
5.76667	0.0004485		5.76667	-0.000162		5.76667	-0.000352
5.77	0.000425		5.77	-0.0001585		5.77	-0.0003645
5.77333	0.000418		5.77333	-0.0001565		5.77333	-0.000358
5.77667	0.0004325		5.77667	-0.0001665		5.77667	-0.0003355
5.78	0.0004295		5.78	-0.0001645		5.78	-0.00032
5.78333	0.0004215		5.78333	-0.0001525		5.78333	-0.000315
5.78667	0.0004305		5.78667	-0.000153		5.78667	-0.000326
5.79	0.0004305		5.79	-0.0001545		5.79	-0.0003395
5.79333	0.000419		5.79333	-0.000163		5.79333	-0.0003405
5.79667	0.0004095		5.79667	-0.0001655		5.79667	-0.000343
5.8	0.000401		5.8	-0.0001615		5.8	-0.000348
5.80333	0.000402		5.80333	-0.00016		5.80333	-0.000354
5.80667	0.000407		5.80667	-0.0001575		5.80667	-0.000351
5.81	0.000404		5.81	-0.000161		5.81	-0.000346
5.81333	0.000401		5.81333	-0.000164		5.81333	-0.0003425
5.81667	0.000401		5.81667	-0.0001745		5.81667	-0.000332
5.82	0.0004		5.82	-0.00017		5.82	-0.0003425
5.82333	0.0004025		5.82333	-0.000154		5.82333	-0.000348
5.82667	0.0004095		5.82667	-0.000157		5.82667	-0.0003445
5.83	0.0004015		5.83	-0.0001555		5.83	-0.0003475
5.83333	0.0003995		5.83333	-0.000157		5.83333	-0.000342
5.83667	0.000398		5.83667	-0.000169		5.83667	-0.0003425
5.84	0.000394		5.84	-0.00017		5.84	-0.00035
5.84333	0.0004045		5.84333	-0.0001705		5.84333	-0.000348
5.84667	0.000406		5.84667	-0.000165		5.84667	-0.000342
5.85	0.000404		5.85	-0.0001535		5.85	-0.000344
5.85333	0.00041		5.85333	-0.000159		5.85333	-0.0003465
5.85667	0.0004185		5.85667	-0.000166		5.85667	-0.0003445
5.86	0.0004165		5.86	-0.0001645		5.86	-0.0003405
5.86333	0.00042		5.86333	-0.000158		5.86333	-0.0003345
5.86667	0.0004155		5.86667	-0.000153		5.86667	-0.00033
5.87	0.000414		5.87	-0.000158		5.87	-0.0003345
5.87333	0.0004235		5.87333	-0.00016		5.87333	-0.0003435
5.87667	0.0004165		5.87667	-0.0001565		5.87667	-0.0003515
5.88	0.0004225		5.88	-0.000161		5.88	-0.0003545
5.88333	0.000444		5.88333	-0.000166		5.88333	-0.0003495
5.88667	0.000453		5.88667	-0.0001565		5.88667	-0.000341
5.89	0.000453		5.89	-0.0001465		5.89	-0.0003415
5.89333	0.0004555		5.89333	-0.000148		5.89333	-0.0003495
5.89667	0.0004635		5.89667	-0.000155		5.89667	-0.000355
5.9	0.0004705		5.9	-0.000159		5.9	-0.000347
5.90333	0.0004665		5.90333	-0.000158		5.90333	-0.0003385
5.90667	0.000463		5.90667	-0.0001525		5.90667	-0.000346
5.91	0.000465		5.91	-0.0001545		5.91	-0.0003535
5.91333	0.0004725		5.91333	-0.0001605		5.91333	-0.0003445
5.91667	0.0004795		5.91667	-0.000159		5.91667	-0.000338
5.92	0.0004825		5.92	-0.000157		5.92	-0.0003515
5.92333	0.0004915		5.92333	-0.000157		5.92333	-0.0003575
5.92667	0.000492		5.92667	-0.0001545		5.92667	-0.000348
5.93	0.000484		5.93	-0.000151		5.93	-0.000351
5.93333	0.0004915		5.93333	-0.000156		5.93333	-0.000365
5.93667	0.0004995		5.93667	-0.000171		5.93667	-0.000365
5.94	0.000504		5.94	-0.0001785		5.94	-0.000356
5.94333	0.000506		5.94333	-0.000169		5.94333	-0.0003575
5.94667	0.000503		5.94667	-0.0001635		5.94667	-0.0003595
5.95	0.000487		5.95	-0.000175		5.95	-0.0003505
5.95333	0.000484		5.95333	-0.000179		5.95333	-0.000344
5.95667	0.0004995		5.95667	-0.000165		5.95667	-0.0003475
5.96	0.000495		5.96	-0.0001605		5.96	-0.0003465
5.96333	0.000489		5.96333	-0.000174		5.96333	-0.0003435
5.96667	0.0004915		5.96667	-0.0001795		5.96667	-0.000356
5.97	0.0004855		5.97	-0.0001765		5.97	-0.000365
5.97333	0.0004875		5.97333	-0.000168		5.97333	-0.0003625
5.97667	0.0004915		5.97667	-0.000156		5.97667	-0.000351
5.98	0.0004745		5.98	-0.0001595		5.98	-0.0003485
5.98333	0.000455		5.98333	-0.000162		5.98333	-0.000356
5.98667	0.0004455		5.98667	-0.0001595		5.98667	-0.000361
5.99	0.000444		5.99	-0.0001685		5.99	-0.000362
5.99333	0.0004435		5.99333	-0.000175		5.99333	-0.0003515
5.99667	0.000441		5.99667	-0.0001655		5.99667	-0.000345
6	0.0004345		6	-0.000161		6	-0.0003465
6.00333	0.0004365		6.00333	-0.000173		6.00333	-0.000354
6.00667	0.000438		6.00667	-0.000175		6.00667	-0.0003525
6.01	0.00044		6.01	-0.0001575		6.01	-0.000348
6.01333	0.000427		6.01333	-0.0001475		6.01333	-0.000349
6.01667	0.0004105		6.01667	-0.0001665		6.01667	-0.0003515
6.02	0.000413		6.02	-0.0001695		6.02	-0.000355
6.02333	0.00041		6.02333	-0.0001645		6.02333	-0.000353
6.02667	0.0003995		6.02667	-0.000168		6.02667	-0.0003425
6.03	0.0004035		6.03	-0.0001665		6.03	-0.0003495
6.03333	0.0004115		6.03333	-0.0001705		6.03333	-0.000362
6.03667	0.0004025		6.03667	-0.000162		6.03667	-0.00036
6.04	0.0003965		6.04	-0.000159		6.04	-0.0003565
6.04333	0.0003875		6.04333	-0.000172		6.04333	-0.000349
6.04667	0.0003785		6.04667	-0.00017		6.04667	-0.000338
6.05	0.0003865		6.05	-0.000158		6.05	-0.000338
6.05333	0.0003975		6.05333	-0.0001585		6.05333	-0.0003565
6.05667	0.0003995		6.05667	-0.0001695		6.05667	-0.0003615
6.06	0.000388		6.06	-0.0001735		6.06	-0.000357
6.06333	0.000367		6.06333	-0.0001675		6.06333	-0.0003505
6.06667	0.0003665		6.06667	-0.000155		6.06667	-0.000348
6.07	0.0003745		6.07	-0.0001525		6.07	-0.0003535
6.07333	0.000374		6.07333	-0.000159		6.07333	-0.0003515
6.07667	0.0003665		6.07667	-0.000155		6.07667	-0.000356
6.08	0.000362		6.08	-0.000161		6.08	-0.000352
6.08333	0.0003625		6.08333	-0.0001755		6.08333	-0.0003435
6.08667	0.0003505		6.08667	-0.000176		6.08667	-0.000346
6.09	0.0003405		6.09	-0.000165		6.09	-0.000355
6.09333	0.0003475		6.09333	-0.0001715		6.09333	-0.000356
6.09667	0.0003515		6.09667	-0.000182		6.09667	-0.0003645
6.1	0.0003465		6.1	-0.0001735		6.1	-0.0003655
6.10333	0.00035		6.10333	-0.000164		6.10333	-0.0003595
6.10667	0.0003555		6.10667	-0.0001665		6.10667	-0.0003625
6.11	0.000346		6.11	-0.000164		6.11	-0.000364
6.11333	0.0003395		6.11333	-0.000161		6.11333	-0.0003685
6.11667	0.00035		6.11667	-0.000166		6.11667	-0.000369
6.12	0.000353		6.12	-0.0001585		6.12	-0.000366
6.12333	0.000345		6.12333	-0.000155		6.12333	-0.0003635
6.12667	0.00034		6.12667	-0.000167		6.12667	-0.0003585
6.13	0.000343		6.13	-0.0001685		6.13	-0.000355
6.13333	0.0003395		6.13333	-0.0001675		6.13333	-0.000357
6.13667	0.000329		6.13667	-0.000158		6.13667	-0.0003575
6.14	0.000324		6.14	-0.000137		6.14	-0.0003495
6.14333	0.000324		6.14333	-0.0001505		6.14333	-0.000343
6.14667	0.000323		6.14667	-0.000172		6.14667	-0.00035
6.15	0.0003155		6.15	-0.0001845		6.15	-0.0003585
6.15333	0.00031		6.15333	-0.000186		6.15333	-0.000358
6.15667	0.000309		6.15667	-0.0001645		6.15667	-0.000357
6.16	0.000301		6.16	-0.0001555		6.16	-0.000363
6.16333	0.0003025		6.16333	-0.000162		6.16333	-0.0003685
6.16667	0.000304		6.16667	-0.0001645		6.16667	-0.000368
6.17	0.000304		6.17	-0.00017		6.17	-0.0003625
6.17333	0.000309		6.17333	-0.0001765		6.17333	-0.0003575
6.17667	0.0003025		6.17667	-0.0001735		6.17667	-0.000356
6.18	0.000298		6.18	-0.0001675		6.18	-0.000365
6.18333	0.0003065		6.18333	-0.0001675		6.18333	-0.000368
6.18667	0.00031		6.18667	-0.0001595		6.18667	-0.000357
6.19	0.000304		6.19	-0.00016		6.19	-0.0003445
6.19333	0.0003005		6.19333	-0.000166		6.19333	-0.000338
6.19667	0.0002975		6.19667	-0.0001665		6.19667	-0.000347
6.2	0.000295		6.2	-0.0001675		6.2	-0.000352
6.20333	0.0002915		6.20333	-0.000162		6.20333	-0.0003445
6.20667	0.000288		6.20667	-0.000155		6.20667	-0.0003495
6.21	0.000285		6.21	-0.000154		6.21	-0.0003575
6.21333	0.000279		6.21333	-0.000155		6.21333	-0.000364
6.21667	0.0002835		6.21667	-0.0001545		6.21667	-0.000372
6.22	0.0002935		6.22	-0.0001625		6.22	-0.0003795
6.22333	0.000291		6.22333	-0.000158		6.22333	-0.0003795
6.22667	0.0002865		6.22667	-0.000148		6.22667	-0.000352
6.23	0.0002985		6.23	-0.000145		6.23	-0.0003355
6.23333	0.0003		6.23333	-0.000144		6.23333	-0.0003435
6.23667	0.0002855		6.23667	-0.000151		6.23667	-0.000347
6.24	0.000283		6.24	-0.0001665		6.24	-0.0003475
6.24333	0.000293		6.24333	-0.0001705		6.24333	-0.0003435
6.24667	0.0002915		6.24667	-0.0001605		6.24667	-0.000343
6.25	0.000286		6.25	-0.0001515		6.25	-0.000343
6.25333	0.0002895		6.25333	-0.000145		6.25333	-0.000335
6.25667	0.0002875		6.25667	-0.0001445		6.25667	-0.0003325
6.26	0.0002825		6.26	-0.0001425		6.26	-0.0003395
6.26333	0.000287		6.26333	-0.0001475		6.26333	-0.0003325
6.26667	0.000292		6.26667	-0.0001575		6.26667	-0.0003145
6.27	0.0002935		6.27	-0.000155		6.27	-0.000319
6.27333	0.000287		6.27333	-0.000145		6.27333	-0.00033
6.27667	0.000272		6.27667	-0.000142		6.27667	-0.0003295
6.28	0.0002835		6.28	-0.0001445		6.28	-0.0003205
6.28333	0.0003015		6.28333	-0.000135		6.28333	-0.0003155
6.28667	0.000294		6.28667	-0.0001265		6.28667	-0.0003235
6.29	0.0002925		6.29	-0.000125		6.29	-0.0003245
6.29333	0.000305		6.29333	-0.000129		6.29333	-0.0003115
6.29667	0.0003025		6.29667	-0.000134		6.29667	-0.000308
6.3	0.000298		6.3	-0.000117		6.3	-0.000311
6.30333	0.000304		6.30333	-0.0001005		6.30333	-0.0003075
6.30667	0.0003175		6.30667	-9.75e-05		6.30667	-0.0003125
6.31	0.000326		6.31	-0.0001		6.31	-0.000319
6.31333	0.0003225		6.31333	-0.0001035		6.31333	-0.0003195
6.31667	0.000328		6.31667	-0.000106		6.31667	-0.0003145
6.32	0.0003335		6.32	-0.000111		6.32	-0.000308
6.32333	0.0003205		6.32333	-0.0001065		6.32333	-0.000305
6.32667	0.0003185		6.32667	-9.9e-05		6.32667	-0.000305
6.33	0.000329		6.33	-9e-05		6.33	-0.000312
6.33333	0.0003375		6.33333	-7.25e-05		6.33333	-0.000305
6.33667	0.000342		6.33667	-7.65e-05		6.33667	-0.000303
6.34	0.0003405		6.34	-9.1e-05		6.34	-0.000321
6.34333	0.0003385		6.34333	-7.95e-05		6.34333	-0.000319
6.34667	0.000336		6.34667	-6.5e-05		6.34667	-0.0003075
6.35	0.0003385		6.35	-7.35e-05		6.35	-0.0002985
6.35333	0.000351		6.35333	-7.55e-05		6.35333	-0.000298
6.35667	0.0003525		6.35667	-7.2e-05		6.35667	-0.000307
6.36	0.0003445		6.36	-7.75e-05		6.36	-0.0003265
6.36333	0.000346		6.36333	-7.55e-05		6.36333	-0.0003295
6.36667	0.0003435		6.36667	-7.65e-05		6.36667	-0.0003275
6.37	0.000342		6.37	-7.9e-05		6.37	-0.000336
6.37333	0.000343		6.37333	-7.7e-05		6.37333	-0.000326
6.37667	0.0003475		6.37667	-8.05e-05		6.37667	-0.000322
6.38	0.0003515		6.38	-7.4e-05		6.38	-0.0003245
6.38333	0.0003425		6.38333	-7.05e-05		6.38333	-0.0003245
6.38667	0.0003235		6.38667	-7.55e-05		6.38667	-0.0003335
6.39	0.0003175		6.39	-8.85e-05		6.39	-0.000338
6.39333	0.000316		6.39333	-9.95e-05		6.39333	-0.000335
6.39667	0.0003135		6.39667	-9.95e-05		6.39667	-0.000339
6.4	0.000316		6.4	-9.9e-05		6.4	-0.000354
6.40333	0.000307		6.40333	-9.45e-05		6.40333	-0.000358
6.40667	0.0003055		6.40667	-8.2e-05		6.40667	-0.0003525
6.41	0.00031		6.41	-7.3e-05		6.41	-0.0003585
6.41333	0.0003085		6.41333	-8.9e-05		6.41333	-0.000359
6.41667	0.0003085		6.41667	-0.0001045		6.41667	-0.0003475
6.42	0.0003065		6.42	-0.0001115		6.42	-0.0003475
6.42333	0.0003035		6.42333	-0.0001095		6.42333	-0.0003585
6.42667	0.000296		6.42667	-0.0001115		6.42667	-0.000364
6.43	0.0002805		6.43	-0.000118		6.43	-0.0003735
6.43333	0.0002655		6.43333	-0.0001185		6.43333	-0.0003715
6.43667	0.0002715		6.43667	-0.0001185		6.43667	-0.000353
6.44	0.000286		6.44	-0.0001225		6.44	-0.000344
6.44333	0.0002765		6.44333	-0.000128		6.44333	-0.000357
6.44667	0.0002695		6.44667	-0.00013		6.44667	-0.000367
6.45	0.000269		6.45	-0.000136		6.45	-0.0003665
6.45333	0.000266		6.45333	-0.000142		6.45333	-0.000377
6.45667	0.000268		6.45667	-0.0001465		6.45667	-0.000368
6.46	0.0002655		6.46	-0.0001455		6.46	-0.000363
6.46333	0.000265		6.46333	-0.0001395		6.46333	-0.0003665
6.46667	0.000256		6.46667	-0.0001415		6.46667	-0.00036
6.47	0.000245		6.47	-0.000147		6.47	-0.000364
6.47333	0.000236		6.47333	-0.000151		6.47333	-0.0003685
6.47667	0.0002335		6.47667	-0.000151		6.47667	-0.0003765
6.48	0.0002385		6.48	-0.000152		6.48	-0.000369
6.48333	0.000239		6.48333	-0.0001565		6.48333	-0.000366
6.48667	0.0002435		6.48667	-0.000154		6.48667	-0.000365
6.49	0.000254		6.49	-0.0001495		6.49	-0.0003535
6.49333	0.000251		6.49333	-0.000157		6.49333	-0.0003585
6.49667	0.0002395		6.49667	-0.0001665		6.49667	-0.000368
6.5	0.0002335		6.5	-0.000161		6.5	-0.0003715
6.50333	0.0002405		6.50333	-0.0001555		6.50333	-0.0003595
6.50667	0.000251		6.50667	-0.000159		6.50667	-0.0003625
6.51	0.0002395		6.51	-0.0001615		6.51	-0.000382
6.51333	0.0002405		6.51333	-0.000157		6.51333	-0.000378
6.51667	0.00025		6.51667	-0.0001545		6.51667	-0.0003655
6.52	0.000243		6.52	-0.0001615		6.52	-0.0003575
6.52333	0.000229		6.52333	-0.0001705		6.52333	-0.0003545
6.52667	0.0002245		6.52667	-0.0001645		6.52667	-0.0003645
6.53	0.000234		6.53	-0.0001595		6.53	-0.0003725
6.53333	0.000239		6.53333	-0.0001635		6.53333	-0.0003775
6.53667	0.0002295		6.53667	-0.0001765		6.53667	-0.000376
6.54	0.00022		6.54	-0.0001755		6.54	-0.000375
6.54333	0.000223		6.54333	-0.0001635		6.54333	-0.000373
6.54667	0.000229		6.54667	-0.000165		6.54667	-0.000366
6.55	0.0002285		6.55	-0.000173		6.55	-0.0003605
6.55333	0.0002215		6.55333	-0.0001725		6.55333	-0.000359
6.55667	0.000221		6.55667	-0.0001615		6.55667	-0.0003715
6.56	0.0002285		6.56	-0.0001605		6.56	-0.0003785
6.56333	0.0002325		6.56333	-0.0001705		6.56333	-0.0003775
6.56667	0.000233		6.56667	-0.000177		6.56667	-0.0003765
6.57	0.000229		6.57	-0.00018		6.57	-0.0003745
6.57333	0.000219		6.57333	-0.0001765		6.57333	-0.00038
6.57667	0.000213		6.57667	-0.0001685		6.57667	-0.0003925
6.58	0.000217		6.58	-0.000172		6.58	-0.000385
6.58333	0.000211		6.58333	-0.000166		6.58333	-0.000366
6.58667	0.000208		6.58667	-0.000159		6.58667	-0.000364
6.59	0.0002185		6.59	-0.000163		6.59	-0.0003645
6.59333	0.000222		6.59333	-0.000169		6.59333	-0.0003705
6.59667	0.0002165		6.59667	-0.0001695		6.59667	-0.0003765
6.6	0.0002025		6.6	-0.0001665		6.6	-0.000376
6.60333	0.0001945		6.60333	-0.000171		6.60333	-0.000381
6.60667	0.000198		6.60667	-0.0001675		6.60667	-0.0003825
6.61	0.000205		6.61	-0.00016		6.61	-0.0003855
6.61333	0.000203		6.61333	-0.0001665		6.61333	-0.00039
6.61667	0.0002005		6.61667	-0.00017		6.61667	-0.0003785
6.62	0.0002045		6.62	-0.0001705		6.62	-0.0003775
6.62333	0.0002005		6.62333	-0.000171		6.62333	-0.000385
6.62667	0.000196		6.62667	-0.0001625		6.62667	-0.000384
6.63	0.0002015		6.63	-0.0001615		6.63	-0.000379
6.63333	0.0002045		6.63333	-0.000166		6.63333	-0.0003695
6.63667	0.0002115		6.63667	-0.000158		6.63667	-0.000376
6.64	0.0002105		6.64	-0.0001615		6.64	-0.000392
6.64333	0.0001945		6.64333	-0.000176		6.64333	-0.0003925
6.64667	0.0001815		6.64667	-0.000168		6.64667	-0.0003825
6.65	0.000183		6.65	-0.0001615		6.65	-0.000376
6.65333	0.000189		6.65333	-0.000169		6.65333	-0.0003815
6.65667	0.000193		6.65667	-0.000171		6.65667	-0.0003865
6.66	0.0001995		6.66	-0.0001725		6.66	-0.00038
[truncated: 7,302 more rows]

## Sheet: Fig 16d
Time (min)	DiPure/2'OMe, crude		Time (min)	DiPure/2'OMe, after HPLC purifiation		Time (min)	DiPure/2'OMe, after photo-irradiation
0	0		0	0		0	0
0.00333	-2e-06		0.00333	1.5e-06		0.00333	9.5e-06
0.00667	7e-06		0.00667	3e-06		0.00667	1.1e-05
0.01	2.1e-05		0.01	3e-06		0.01	-4e-06
0.01333	1.75e-05		0.01333	-8.5e-06		0.01333	-3e-06
0.01667	1.3e-05		0.01667	-3e-06		0.01667	6e-06
0.02	2e-05		0.02	1.8e-05		0.02	1.3e-05
0.02333	2.75e-05		0.02333	2.55e-05		0.02333	1.15e-05
0.02667	2.25e-05		0.02667	2.6e-05		0.02667	0
0.03	2.65e-05		0.03	3.4e-05		0.03	1e-06
0.03333	3.75e-05		0.03333	3.65e-05		0.03333	7e-06
0.03667	4.55e-05		0.03667	2.2e-05		0.03667	1.05e-05
0.04	5.4e-05		0.04	9e-06		0.04	1.65e-05
0.04333	5.45e-05		0.04333	1.3e-05		0.04333	1.45e-05
0.04667	3.85e-05		0.04667	2.75e-05		0.04667	5e-07
0.05	2.45e-05		0.05	2.85e-05		0.05	-6.5e-06
0.05333	3.05e-05		0.05333	1.55e-05		0.05333	-2e-06
0.05667	3.5e-05		0.05667	2.05e-05		0.05667	3.5e-06
0.06	2.7e-05		0.06	2.3e-05		0.06	-2e-06
0.06333	3.15e-05		0.06333	1.3e-05		0.06333	-9e-06
0.06667	4.65e-05		0.06667	1.75e-05		0.06667	5e-06
0.07	4.3e-05		0.07	2.7e-05		0.07	1.15e-05
0.07333	3.1e-05		0.07333	2.1e-05		0.07333	3e-06
0.07667	2.85e-05		0.07667	1.7e-05		0.07667	8.5e-06
0.08	3.2e-05		0.08	2.5e-05		0.08	1.8e-05
0.08333	4.3e-05		0.08333	2.75e-05		0.08333	1.35e-05
0.08667	5.75e-05		0.08667	2.25e-05		0.08667	1.3e-05
0.09	5.05e-05		0.09	2.45e-05		0.09	2.1e-05
0.09333	3.6e-05		0.09333	2.4e-05		0.09333	2e-05
0.09667	3.15e-05		0.09667	1.4e-05		0.09667	1.85e-05
0.1	2.8e-05		0.1	1.65e-05		0.1	1.9e-05
0.10333	2.35e-05		0.10333	2.2e-05		0.10333	1.25e-05
0.10667	3.3e-05		0.10667	2.7e-05		0.10667	1e-05
0.11	3.35e-05		0.11	2.25e-05		0.11	5e-06
0.11333	1.75e-05		0.11333	1.7e-05		0.11333	-2e-06
0.11667	1.2e-05		0.11667	2.45e-05		0.11667	1.65e-05
0.12	1.9e-05		0.12	2.1e-05		0.12	2.7e-05
0.12333	2.45e-05		0.12333	2e-05		0.12333	1.35e-05
0.12667	2.35e-05		0.12667	2.4e-05		0.12667	3e-06
0.13	2.6e-05		0.13	3.05e-05		0.13	4.5e-06
0.13333	4.1e-05		0.13333	3.45e-05		0.13333	1e-05
0.13667	3.3e-05		0.13667	2.9e-05		0.13667	1.8e-05
0.14	2.8e-05		0.14	1.65e-05		0.14	1.95e-05
0.14333	3.3e-05		0.14333	3e-06		0.14333	1.3e-05
0.14667	3e-05		0.14667	1.1e-05		0.14667	1.3e-05
0.15	3.1e-05		0.15	2.05e-05		0.15	4.5e-06
0.15333	3.05e-05		0.15333	2e-05		0.15333	8e-06
0.15667	2.8e-05		0.15667	1.15e-05		0.15667	1.1e-05
0.16	2.3e-05		0.16	-5e-07		0.16	2.5e-06
0.16333	3.75e-05		0.16333	-3.5e-06		0.16333	1.5e-06
0.16667	4.05e-05		0.16667	2e-06		0.16667	0
0.17	2.55e-05		0.17	8.5e-06		0.17	6.5e-06
0.17333	1.8e-05		0.17333	1e-05		0.17333	1.35e-05
0.17667	1.3e-05		0.17667	9e-06		0.17667	1.7e-05
0.18	6e-06		0.18	6e-06		0.18	1e-05
0.18333	1e-05		0.18333	1.2e-05		0.18333	1.05e-05
0.18667	1.95e-05		0.18667	2.8e-05		0.18667	2.05e-05
0.19	2.85e-05		0.19	3.15e-05		0.19	1.8e-05
0.19333	3.35e-05		0.19333	2.95e-05		0.19333	8e-06
0.19667	3.3e-05		0.19667	2.15e-05		0.19667	1.05e-05
0.2	3.15e-05		0.2	1.25e-05		0.2	2.8e-05
0.20333	2.6e-05		0.20333	7e-06		0.20333	2.45e-05
0.20667	2.2e-05		0.20667	6.5e-06		0.20667	1.35e-05
0.21	1.6e-05		0.21	1.8e-05		0.21	1.2e-05
0.21333	1.25e-05		0.21333	1.95e-05		0.21333	1.25e-05
0.21667	1.6e-05		0.21667	1.35e-05		0.21667	5.5e-06
0.22	2.85e-05		0.22	1.85e-05		0.22	-6e-06
0.22333	3.95e-05		0.22333	1.65e-05		0.22333	-2e-06
0.22667	3.4e-05		0.22667	1e-05		0.22667	3e-06
0.23	2.65e-05		0.23	1.2e-05		0.23	4e-06
0.23333	2.9e-05		0.23333	1.05e-05		0.23333	1.1e-05
0.23667	3.35e-05		0.23667	6.5e-06		0.23667	1.45e-05
0.24	2.25e-05		0.24	1.5e-05		0.24	1.1e-05
0.24333	2.25e-05		0.24333	2.15e-05		0.24333	2e-06
0.24667	2.95e-05		0.24667	2.1e-05		0.24667	3.5e-06
0.25	3.1e-05		0.25	2.7e-05		0.25	4.5e-06
0.25333	4.5e-05		0.25333	2.35e-05		0.25333	4.5e-06
0.25667	4.55e-05		0.25667	2.35e-05		0.25667	8.5e-06
0.26	2.95e-05		0.26	3.25e-05		0.26	4.5e-06
0.26333	2.7e-05		0.26333	3.15e-05		0.26333	6.5e-06
0.26667	3.7e-05		0.26667	2.1e-05		0.26667	1.65e-05
0.27	3.9e-05		0.27	2e-06		0.27	1.3e-05
0.27333	3.6e-05		0.27333	1.15e-05		0.27333	3.5e-06
0.27667	2.75e-05		0.27667	3e-05		0.27667	4e-06
0.28	2.8e-05		0.28	3.1e-05		0.28	1e-05
0.28333	4.1e-05		0.28333	2.7e-05		0.28333	1.7e-05
0.28667	4.95e-05		0.28667	1.75e-05		0.28667	1e-05
0.29	5.7e-05		0.29	1.35e-05		0.29	3e-06
0.29333	5.7e-05		0.29333	9.5e-06		0.29333	1e-05
0.29667	5.15e-05		0.29667	1e-05		0.29667	1.9e-05
0.3	4.7e-05		0.3	2.3e-05		0.3	1.5e-05
0.30333	4.75e-05		0.30333	3.05e-05		0.30333	1.45e-05
0.30667	3.45e-05		0.30667	2.95e-05		0.30667	2.15e-05
0.31	3.25e-05		0.31	2.75e-05		0.31	1.3e-05
0.31333	4.55e-05		0.31333	2.75e-05		0.31333	1.05e-05
0.31667	4.05e-05		0.31667	2.65e-05		0.31667	1.9e-05
0.32	3.2e-05		0.32	2.4e-05		0.32	1.05e-05
0.32333	3.7e-05		0.32333	2.3e-05		0.32333	9.5e-06
0.32667	3.85e-05		0.32667	2.45e-05		0.32667	1.55e-05
0.33	3.05e-05		0.33	3e-05		0.33	1.35e-05
0.33333	3.4e-05		0.33333	2.35e-05		0.33333	1.55e-05
0.33667	3.5e-05		0.33667	1.25e-05		0.33667	9e-06
0.34	3.75e-05		0.34	1.4e-05		0.34	-5.5e-06
0.34333	4.1e-05		0.34333	2.15e-05		0.34333	-2.5e-06
0.34667	3.45e-05		0.34667	3.4e-05		0.34667	7.5e-06
0.35	3.3e-05		0.35	3.8e-05		0.35	6e-06
0.35333	3.7e-05		0.35333	2.3e-05		0.35333	0
0.35667	3.9e-05		0.35667	1.3e-05		0.35667	-1e-05
0.36	4.05e-05		0.36	1e-05		0.36	-1.35e-05
0.36333	3.65e-05		0.36333	1e-05		0.36333	-1.15e-05
0.36667	3.25e-05		0.36667	1.95e-05		0.36667	-1e-05
0.37	2.85e-05		0.37	2.15e-05		0.37	-7e-06
0.37333	1.85e-05		0.37333	1.65e-05		0.37333	-2.5e-06
0.37667	2e-05		0.37667	1.95e-05		0.37667	3e-06
0.38	3.4e-05		0.38	2.85e-05		0.38	4e-06
0.38333	3.2e-05		0.38333	2.8e-05		0.38333	9.5e-06
0.38667	2.95e-05		0.38667	2.6e-05		0.38667	9.5e-06
0.39	2.55e-05		0.39	3.9e-05		0.39	5e-07
0.39333	1.65e-05		0.39333	3.3e-05		0.39333	-1.1e-05
0.39667	2.45e-05		0.39667	2.45e-05		0.39667	-1.45e-05
0.4	2.85e-05		0.4	2.55e-05		0.4	-1e-05
0.40333	1.85e-05		0.40333	1.55e-05		0.40333	-1.3e-05
0.40667	2.6e-05		0.40667	1.25e-05		0.40667	-1.75e-05
0.41	2.45e-05		0.41	7e-06		0.41	-1.55e-05
0.41333	1.45e-05		0.41333	-2e-06		0.41333	-4.5e-06
0.41667	2.15e-05		0.41667	5e-07		0.41667	5e-07
0.42	2.4e-05		0.42	2.5e-06		0.42	2e-06
0.42333	2.15e-05		0.42333	3.5e-06		0.42333	-6e-06
0.42667	2.2e-05		0.42667	2.2e-05		0.42667	-1.25e-05
0.43	2.25e-05		0.43	2.6e-05		0.43	-9.5e-06
0.43333	2.75e-05		0.43333	2.1e-05		0.43333	-1.2e-05
0.43667	2.85e-05		0.43667	2e-05		0.43667	-1.65e-05
0.44	2e-05		0.44	1.35e-05		0.44	-1.05e-05
0.44333	1.65e-05		0.44333	1.2e-05		0.44333	-9e-06
0.44667	1.25e-05		0.44667	7.5e-06		0.44667	-2.65e-05
0.45	1.75e-05		0.45	7e-06		0.45	-3.9e-05
0.45333	2.85e-05		0.45333	1.05e-05		0.45333	-3.45e-05
0.45667	3.3e-05		0.45667	1.6e-05		0.45667	-3.05e-05
0.46	3e-05		0.46	1.75e-05		0.46	-3.05e-05
0.46333	2.4e-05		0.46333	1.35e-05		0.46333	-2.45e-05
0.46667	3.25e-05		0.46667	2.4e-05		0.46667	-1.4e-05
0.47	3.15e-05		0.47	3.15e-05		0.47	-1.45e-05
0.47333	1.45e-05		0.47333	2.1e-05		0.47333	-1.4e-05
0.47667	1.25e-05		0.47667	1e-05		0.47667	-1.15e-05
0.48	2.4e-05		0.48	8e-06		0.48	-1.7e-05
0.48333	2.65e-05		0.48333	1.6e-05		0.48333	-2.3e-05
0.48667	2.6e-05		0.48667	1.45e-05		0.48667	-3.2e-05
0.49	3.1e-05		0.49	1.4e-05		0.49	-2.7e-05
0.49333	2.85e-05		0.49333	1.9e-05		0.49333	-2.15e-05
0.49667	3.25e-05		0.49667	2e-05		0.49667	-1.7e-05
0.5	3.15e-05		0.5	2.15e-05		0.5	-1.9e-05
0.50333	3.15e-05		0.50333	1.4e-05		0.50333	-2.2e-05
0.50667	4.2e-05		0.50667	6e-06		0.50667	-1.9e-05
0.51	4.55e-05		0.51	5.5e-06		0.51	-2.6e-05
0.51333	4.05e-05		0.51333	1.25e-05		0.51333	-2.7e-05
0.51667	3.2e-05		0.51667	1.1e-05		0.51667	-2e-05
0.52	2.85e-05		0.52	6e-06		0.52	-1.5e-05
0.52333	2.05e-05		0.52333	-1.5e-06		0.52333	-1.05e-05
0.52667	1.95e-05		0.52667	-9.5e-06		0.52667	-1e-05
0.53	2.2e-05		0.53	6e-06		0.53	-2.3e-05
0.53333	2.1e-05		0.53333	1.65e-05		0.53333	-2.75e-05
0.53667	1.2e-05		0.53667	1.45e-05		0.53667	-2.25e-05
0.54	5.5e-06		0.54	1.85e-05		0.54	-2.55e-05
0.54333	8.5e-06		0.54333	2.25e-05		0.54333	-2.35e-05
0.54667	2.55e-05		0.54667	1.85e-05		0.54667	-1.25e-05
0.55	3.85e-05		0.55	1.7e-05		0.55	-1.55e-05
0.55333	2.75e-05		0.55333	2.15e-05		0.55333	-2.8e-05
0.55667	1e-05		0.55667	7.5e-06		0.55667	-4.1e-05
0.56	3.5e-06		0.56	-6.5e-06		0.56	-4.4e-05
0.56333	1e-05		0.56333	1.5e-06		0.56333	-3.1e-05
0.56667	2.15e-05		0.56667	1.45e-05		0.56667	-2.05e-05
0.57	3.05e-05		0.57	1.65e-05		0.57	-2.6e-05
0.57333	3e-05		0.57333	1.45e-05		0.57333	-3.7e-05
0.57667	2.45e-05		0.57667	1e-05		0.57667	-3.55e-05
0.58	2.9e-05		0.58	-5e-07		0.58	-3.35e-05
0.58333	3.65e-05		0.58333	-9.5e-06		0.58333	-2.75e-05
0.58667	2.9e-05		0.58667	0		0.58667	-2.6e-05
0.59	2.2e-05		0.59	9.5e-06		0.59	-4.1e-05
0.59333	1.1e-05		0.59333	6e-06		0.59333	-3.45e-05
0.59667	1.7e-05		0.59667	-2.5e-06		0.59667	-1.95e-05
0.6	2.6e-05		0.6	-5e-06		0.6	-2.4e-05
0.60333	1.65e-05		0.60333	2e-06		0.60333	-2.3e-05
0.60667	9e-06		0.60667	8.5e-06		0.60667	-2.1e-05
0.61	1.15e-05		0.61	6e-06		0.61	-3.05e-05
0.61333	7.5e-06		0.61333	-2e-06		0.61333	-3.35e-05
0.61667	6.5e-06		0.61667	-3e-06		0.61667	-2.65e-05
0.62	1.8e-05		0.62	5.5e-06		0.62	-2.6e-05
0.62333	2.7e-05		0.62333	1.1e-05		0.62333	-3.9e-05
0.62667	3e-05		0.62667	1.5e-05		0.62667	-3.2e-05
0.63	2.75e-05		0.63	1.45e-05		0.63	-1.65e-05
0.63333	3.9e-05		0.63333	1.2e-05		0.63333	-2.4e-05
0.63667	3.8e-05		0.63667	1.5e-05		0.63667	-3.65e-05
0.64	2.2e-05		0.64	1.45e-05		0.64	-4.1e-05
0.64333	2.1e-05		0.64333	1e-05		0.64333	-4.2e-05
0.64667	2.9e-05		0.64667	-2e-06		0.64667	-5.25e-05
0.65	2.3e-05		0.65	-5e-06		0.65	-4.55e-05
0.65333	2.4e-05		0.65333	-1e-06		0.65333	-3e-05
0.65667	3.25e-05		0.65667	9e-06		0.65667	-3.35e-05
0.66	2.5e-05		0.66	1.4e-05		0.66	-4.3e-05
0.66333	1.4e-05		0.66333	1.9e-05		0.66333	-4.25e-05
0.66667	1.7e-05		0.66667	2.2e-05		0.66667	-4.15e-05
0.67	3.15e-05		0.67	1.7e-05		0.67	-4.8e-05
0.67333	2.75e-05		0.67333	1.65e-05		0.67333	-5.65e-05
0.67667	1.75e-05		0.67667	1.8e-05		0.67667	-5.8e-05
0.68	2.15e-05		0.68	2.4e-05		0.68	-4.5e-05
0.68333	1.45e-05		0.68333	2.4e-05		0.68333	-3.35e-05
0.68667	6.5e-06		0.68667	1.75e-05		0.68667	-3.35e-05
0.69	1.95e-05		0.69	1.65e-05		0.69	-4e-05
0.69333	1.8e-05		0.69333	9e-06		0.69333	-4.4e-05
0.69667	1.3e-05		0.69667	0		0.69667	-4.1e-05
0.7	1.7e-05		0.7	3.5e-06		0.7	-5.1e-05
0.70333	1.95e-05		0.70333	9.5e-06		0.70333	-6.6e-05
0.70667	2.25e-05		0.70667	1.15e-05		0.70667	-6.75e-05
0.71	1.9e-05		0.71	1.6e-05		0.71	-4.8e-05
0.71333	1.6e-05		0.71333	2e-05		0.71333	-3.05e-05
0.71667	2.05e-05		0.71667	2e-05		0.71667	-3.15e-05
0.72	2.75e-05		0.72	2.2e-05		0.72	-3.6e-05
0.72333	2.35e-05		0.72333	2.05e-05		0.72333	-4.85e-05
0.72667	2.3e-05		0.72667	1.8e-05		0.72667	-5.7e-05
0.73	2.55e-05		0.73	1.55e-05		0.73	-4.65e-05
0.73333	2.85e-05		0.73333	1.1e-05		0.73333	-3.7e-05
0.73667	2.45e-05		0.73667	9.5e-06		0.73667	-4.15e-05
0.74	2.1e-05		0.74	1.55e-05		0.74	-3.9e-05
0.74333	1.85e-05		0.74333	6.5e-06		0.74333	-3.4e-05
0.74667	6.5e-06		0.74667	0		0.74667	-3.4e-05
0.75	1.05e-05		0.75	1.3e-05		0.75	-4.25e-05
0.75333	1.35e-05		0.75333	9.5e-06		0.75333	-5.4e-05
0.75667	1.1e-05		0.75667	7.5e-06		0.75667	-4.9e-05
0.76	9e-06		0.76	1.1e-05		0.76	-5.25e-05
0.76333	1.3e-05		0.76333	1.5e-06		0.76333	-6.05e-05
0.76667	3.2e-05		0.76667	3.5e-06		0.76667	-5.1e-05
0.77	4.3e-05		0.77	1.3e-05		0.77	-4.4e-05
0.77333	4.9e-05		0.77333	9.5e-06		0.77333	-4.65e-05
0.77667	3.95e-05		0.77667	7e-06		0.77667	-3.45e-05
0.78	1.45e-05		0.78	7.5e-06		0.78	-3.5e-05
0.78333	1.2e-05		0.78333	1.15e-05		0.78333	-4.85e-05
0.78667	1.1e-05		0.78667	1.9e-05		0.78667	-4.85e-05
0.79	5.5e-06		0.79	1.95e-05		0.79	-4.95e-05
0.79333	1.65e-05		0.79333	1.55e-05		0.79333	-5.05e-05
0.79667	2e-05		0.79667	1.65e-05		0.79667	-4.8e-05
0.8	1.85e-05		0.8	1.7e-05		0.8	-4.95e-05
0.80333	2.8e-05		0.80333	8.5e-06		0.80333	-5.95e-05
0.80667	3.05e-05		0.80667	7.5e-06		0.80667	-5.7e-05
0.81	2.25e-05		0.81	1.3e-05		0.81	-5.15e-05
0.81333	1.75e-05		0.81333	8.5e-06		0.81333	-6.35e-05
0.81667	2.6e-05		0.81667	2.5e-06		0.81667	-6.55e-05
0.82	2.9e-05		0.82	2.5e-06		0.82	-5.9e-05
0.82333	2.75e-05		0.82333	6e-06		0.82333	-5e-05
0.82667	2.95e-05		0.82667	1.75e-05		0.82667	-3.65e-05
0.83	2.35e-05		0.83	2.4e-05		0.83	-4.05e-05
0.83333	2e-05		0.83333	1.5e-05		0.83333	-5.4e-05
0.83667	1.85e-05		0.83667	1.55e-05		0.83667	-5.45e-05
0.84	1.3e-05		0.84	2.15e-05		0.84	-5.65e-05
0.84333	1.95e-05		0.84333	2.65e-05		0.84333	-6.15e-05
0.84667	2.65e-05		0.84667	3.3e-05		0.84667	-5.95e-05
0.85	2.5e-05		0.85	1.95e-05		0.85	-6.55e-05
0.85333	3.3e-05		0.85333	1.05e-05		0.85333	-5.8e-05
0.85667	4.15e-05		0.85667	1.2e-05		0.85667	-4.7e-05
0.86	3.3e-05		0.86	4.5e-06		0.86	-5.4e-05
0.86333	2.35e-05		0.86333	1.1e-05		0.86333	-6e-05
0.86667	2.6e-05		0.86667	2.3e-05		0.86667	-5.8e-05
0.87	1.65e-05		0.87	2.2e-05		0.87	-5.8e-05
0.87333	1.5e-05		0.87333	1.05e-05		0.87333	-6.4e-05
0.87667	2.55e-05		0.87667	8e-06		0.87667	-6.55e-05
0.88	2.25e-05		0.88	1.6e-05		0.88	-5.4e-05
0.88333	2.35e-05		0.88333	1.7e-05		0.88333	-5.25e-05
0.88667	3e-05		0.88667	1.45e-05		0.88667	-5.55e-05
0.89	3.2e-05		0.89	1.2e-05		0.89	-5.5e-05
0.89333	2.6e-05		0.89333	1.4e-05		0.89333	-5.6e-05
0.89667	1.15e-05		0.89667	1.5e-05		0.89667	-4.9e-05
0.9	8e-06		0.9	4e-06		0.9	-4.4e-05
0.90333	7.5e-06		0.90333	-4.5e-06		0.90333	-5.65e-05
0.90667	7.5e-06		0.90667	3.5e-06		0.90667	-6.05e-05
0.91	1.5e-05		0.91	7e-06		0.91	-5.15e-05
0.91333	1.95e-05		0.91333	4.5e-06		0.91333	-6.05e-05
0.91667	2.6e-05		0.91667	7.5e-06		0.91667	-6.65e-05
0.92	2.35e-05		0.92	1.65e-05		0.92	-5.7e-05
0.92333	1.05e-05		0.92333	7e-06		0.92333	-4.75e-05
0.92667	1.75e-05		0.92667	-5.5e-06		0.92667	-6.05e-05
0.93	3.3e-05		0.93	3e-06		0.93	-6.65e-05
0.93333	2.15e-05		0.93333	1.2e-05		0.93333	-6.05e-05
0.93667	1.75e-05		0.93667	1.6e-05		0.93667	-5.2e-05
0.94	2.35e-05		0.94	1.25e-05		0.94	-5.4e-05
0.94333	1.65e-05		0.94333	-2.5e-06		0.94333	-6.35e-05
0.94667	2.6e-05		0.94667	-1e-06		0.94667	-5.75e-05
0.95	3.15e-05		0.95	3.5e-06		0.95	-6e-05
0.95333	2.3e-05		0.95333	1.3e-05		0.95333	-6.45e-05
0.95667	2.05e-05		0.95667	2.6e-05		0.95667	-5.7e-05
0.96	2.1e-05		0.96	8e-06		0.96	-6e-05
0.96333	1.35e-05		0.96333	-4e-06		0.96333	-7.4e-05
0.96667	1.2e-05		0.96667	4e-06		0.96667	-7.15e-05
0.97	1.1e-05		0.97	1.35e-05		0.97	-7.05e-05
0.97333	1.2e-05		0.97333	2.5e-05		0.97333	-6.05e-05
0.97667	1.9e-05		0.97667	2.6e-05		0.97667	-4.55e-05
0.98	1.9e-05		0.98	2.2e-05		0.98	-5.8e-05
0.98333	2.1e-05		0.98333	1.9e-05		0.98333	-6.1e-05
0.98667	1.95e-05		0.98667	1.35e-05		0.98667	-5.4e-05
0.99	2.35e-05		0.99	9e-06		0.99	-6.1e-05
0.99333	1.95e-05		0.99333	-1.5e-06		0.99333	-7.15e-05
0.99667	2.25e-05		0.99667	1e-06		0.99667	-7.95e-05
1	3.35e-05		1	6.5e-06		1	-6.55e-05
1.00333	2.3e-05		1.00333	5e-07		1.00333	-4.95e-05
1.00667	1.45e-05		1.00667	2.5e-06		1.00667	-6e-05
1.01	1.15e-05		1.01	8.5e-06		1.01	-6.7e-05
1.01333	1.35e-05		1.01333	9.5e-06		1.01333	-5.95e-05
1.01667	2.05e-05		1.01667	1.3e-05		1.01667	-5.75e-05
1.02	2.3e-05		1.02	1.35e-05		1.02	-6.1e-05
1.02333	1.8e-05		1.02333	9e-06		1.02333	-6.35e-05
1.02667	2.3e-05		1.02667	3e-06		1.02667	-5.9e-05
1.03	2.75e-05		1.03	5.5e-06		1.03	-6.5e-05
1.03333	1.95e-05		1.03333	1.7e-05		1.03333	-7.95e-05
1.03667	2.1e-05		1.03667	2e-05		1.03667	-7.4e-05
1.04	1.6e-05		1.04	1.95e-05		1.04	-6.2e-05
1.04333	6e-06		1.04333	1.15e-05		1.04333	-6.15e-05
1.04667	8e-06		1.04667	1.2e-05		1.04667	-6.15e-05
1.05	2.25e-05		1.05	1.75e-05		1.05	-6.7e-05
1.05333	2.8e-05		1.05333	1.6e-05		1.05333	-7.1e-05
1.05667	3.25e-05		1.05667	1.8e-05		1.05667	-6.2e-05
1.06	3.75e-05		1.06	1e-05		1.06	-5.9e-05
1.06333	4.2e-05		1.06333	1e-06		1.06333	-5.75e-05
1.06667	4.2e-05		1.06667	5.5e-06		1.06667	-5.9e-05
1.07	3.25e-05		1.07	9.5e-06		1.07	-6.3e-05
1.07333	2.8e-05		1.07333	2e-05		1.07333	-7.1e-05
1.07667	3e-05		1.07667	1.85e-05		1.07667	-6.7e-05
1.08	4.15e-05		1.08	1.45e-05		1.08	-6.05e-05
1.08333	4.05e-05		1.08333	1.8e-05		1.08333	-6.9e-05
1.08667	2.6e-05		1.08667	1.7e-05		1.08667	-6.8e-05
1.09	2.9e-05		1.09	1.9e-05		1.09	-5.9e-05
1.09333	2.5e-05		1.09333	1.1e-05		1.09333	-5.85e-05
1.09667	8.5e-06		1.09667	-9e-06		1.09667	-6.65e-05
1.1	2.35e-05		1.1	-1.05e-05		1.1	-6.85e-05
1.10333	3.6e-05		1.10333	6.5e-06		1.10333	-6.45e-05
1.10667	2.3e-05		1.10667	1.45e-05		1.10667	-6.85e-05
1.11	2.4e-05		1.11	1.8e-05		1.11	-6.8e-05
1.11333	2.9e-05		1.11333	1.05e-05		1.11333	-5.8e-05
1.11667	2.1e-05		1.11667	-1e-05		1.11667	-6.5e-05
1.12	2.05e-05		1.12	-1.35e-05		1.12	-7.55e-05
1.12333	2.75e-05		1.12333	-1.5e-06		1.12333	-7.95e-05
1.12667	2.95e-05		1.12667	3e-06		1.12667	-8.65e-05
1.13	2.8e-05		1.13	2e-06		1.13	-8.15e-05
1.13333	2.9e-05		1.13333	1.1e-05		1.13333	-7e-05
1.13667	2.4e-05		1.13667	1.7e-05		1.13667	-7.15e-05
1.14	1.7e-05		1.14	1.6e-05		1.14	-8e-05
1.14333	2.1e-05		1.14333	5.5e-06		1.14333	-8e-05
1.14667	2.25e-05		1.14667	2e-06		1.14667	-7.65e-05
1.15	2.25e-05		1.15	1.6e-05		1.15	-7.8e-05
1.15333	2.05e-05		1.15333	3.15e-05		1.15333	-8e-05
1.15667	1.4e-05		1.15667	2.75e-05		1.15667	-7.9e-05
1.16	2.1e-05		1.16	1.45e-05		1.16	-8.5e-05
1.16333	3.35e-05		1.16333	1.65e-05		1.16333	-8.9e-05
1.16667	3.55e-05		1.16667	1.4e-05		1.16667	-7.35e-05
1.17	3e-05		1.17	8.5e-06		1.17	-7.15e-05
1.17333	1.9e-05		1.17333	1.85e-05		1.17333	-8.6e-05
1.17667	1.9e-05		1.17667	2.15e-05		1.17667	-7.9e-05
1.18	3.55e-05		1.18	1.4e-05		1.18	-7.5e-05
1.18333	3.35e-05		1.18333	1.6e-05		1.18333	-8.65e-05
1.18667	2.5e-05		1.18667	8.5e-06		1.18667	-8.45e-05
1.19	2.65e-05		1.19	-2e-06		1.19	-8.55e-05
1.19333	2.2e-05		1.19333	4.5e-06		1.19333	-8.05e-05
1.19667	1.55e-05		1.19667	1.95e-05		1.19667	-6.6e-05
1.2	2.1e-05		1.2	2.65e-05		1.2	-6.7e-05
1.20333	3.05e-05		1.20333	1.6e-05		1.20333	-6.7e-05
1.20667	2.45e-05		1.20667	1.05e-05		1.20667	-7.6e-05
1.21	7e-06		1.21	1.65e-05		1.21	-7.95e-05
1.21333	5e-06		1.21333	1.15e-05		1.21333	-7.4e-05
1.21667	1.15e-05		1.21667	6e-06		1.21667	-6.8e-05
1.22	2.5e-05		1.22	9e-06		1.22	-6.8e-05
1.22333	3.6e-05		1.22333	1.7e-05		1.22333	-8e-05
1.22667	2.65e-05		1.22667	1.65e-05		1.22667	-8.3e-05
1.23	2.5e-05		1.23	9e-06		1.23	-8.45e-05
1.23333	2.4e-05		1.23333	5.5e-06		1.23333	-8.85e-05
1.23667	2e-05		1.23667	6e-06		1.23667	-8.1e-05
1.24	1.65e-05		1.24	7.5e-06		1.24	-7.1e-05
1.24333	2.05e-05		1.24333	1.15e-05		1.24333	-7.75e-05
1.24667	3.05e-05		1.24667	1.55e-05		1.24667	-8.65e-05
1.25	2.35e-05		1.25	1.4e-05		1.25	-8.2e-05
1.25333	2.8e-05		1.25333	1e-05		1.25333	-8.1e-05
1.25667	3.3e-05		1.25667	1.55e-05		1.25667	-8.45e-05
1.26	1.6e-05		1.26	2.85e-05		1.26	-8.6e-05
1.26333	9e-06		1.26333	2.7e-05		1.26333	-8.45e-05
1.26667	2.05e-05		1.26667	2.6e-05		1.26667	-7.4e-05
1.27	2.85e-05		1.27	2.65e-05		1.27	-7.3e-05
1.27333	2.35e-05		1.27333	1.4e-05		1.27333	-7.95e-05
1.27667	2e-05		1.27667	1.25e-05		1.27667	-8.55e-05
1.28	3.1e-05		1.28	2e-05		1.28	-8.4e-05
1.28333	3.15e-05		1.28333	1.45e-05		1.28333	-7.4e-05
1.28667	2.3e-05		1.28667	8e-06		1.28667	-7.25e-05
1.29	2.9e-05		1.29	9.5e-06		1.29	-7.95e-05
1.29333	2.5e-05		1.29333	7e-06		1.29333	-8.15e-05
1.29667	2.55e-05		1.29667	5e-07		1.29667	-8.05e-05
1.3	2.35e-05		1.3	6e-06		1.3	-7.3e-05
1.30333	1.2e-05		1.30333	1.25e-05		1.30333	-7.25e-05
1.30667	1.3e-05		1.30667	1.1e-05		1.30667	-7.95e-05
1.31	1.75e-05		1.31	4.5e-06		1.31	-7.6e-05
1.31333	2.3e-05		1.31333	1.15e-05		1.31333	-7.6e-05
1.31667	1.55e-05		1.31667	1.6e-05		1.31667	-7.45e-05
1.32	7e-06		1.32	3e-06		1.32	-6.8e-05
1.32333	1.3e-05		1.32333	8e-06		1.32333	-6.85e-05
1.32667	2.3e-05		1.32667	1.2e-05		1.32667	-7.55e-05
1.33	1.8e-05		1.33	1.3e-05		1.33	-8.05e-05
1.33333	1.5e-05		1.33333	1.25e-05		1.33333	-8e-05
1.33667	2.4e-05		1.33667	-1e-06		1.33667	-8.15e-05
1.34	2.25e-05		1.34	1.1e-05		1.34	-9.25e-05
1.34333	2e-05		1.34333	2.45e-05		1.34333	-0.0001075
1.34667	1.6e-05		1.34667	1.6e-05		1.34667	-0.0001115
1.35	1.75e-05		1.35	6e-06		1.35	-0.0001025
1.35333	2.4e-05		1.35333	2e-06		1.35333	-9.4e-05
1.35667	1.35e-05		1.35667	1.85e-05		1.35667	-8.7e-05
1.36	1.45e-05		1.36	2.55e-05		1.36	-7.5e-05
1.36333	2.15e-05		1.36333	1.75e-05		1.36333	-7.65e-05
1.36667	1.5e-05		1.36667	1.6e-05		1.36667	-8.4e-05
1.37	1.85e-05		1.37	9e-06		1.37	-8.45e-05
1.37333	2.4e-05		1.37333	1.05e-05		1.37333	-8.3e-05
1.37667	2e-05		1.37667	9e-06		1.37667	-8.65e-05
1.38	2.35e-05		1.38	5.5e-06		1.38	-8.75e-05
1.38333	2.7e-05		1.38333	1e-05		1.38333	-8.35e-05
1.38667	1.5e-05		1.38667	6e-06		1.38667	-8.65e-05
1.39	1.1e-05		1.39	1.1e-05		1.39	-8.4e-05
1.39333	2.4e-05		1.39333	8.5e-06		1.39333	-8.5e-05
1.39667	2.95e-05		1.39667	-5e-06		1.39667	-8.7e-05
1.4	2.2e-05		1.4	1e-06		1.4	-8.55e-05
1.40333	1.3e-05		1.40333	3e-06		1.40333	-8.25e-05
1.40667	1.6e-05		1.40667	6.5e-06		1.40667	-7.65e-05
1.41	1.15e-05		1.41	3e-06		1.41	-8e-05
1.41333	4e-06		1.41333	-1.5e-06		1.41333	-8.2e-05
1.41667	1.3e-05		1.41667	5e-06		1.41667	-8.75e-05
1.42	1.5e-05		1.42	4e-06		1.42	-8.2e-05
1.42333	1.55e-05		1.42333	1.45e-05		1.42333	-7.45e-05
1.42667	1.9e-05		1.42667	1.4e-05		1.42667	-7.45e-05
1.43	1.55e-05		1.43	5e-06		1.43	-6.8e-05
1.43333	2.1e-05		1.43333	2.5e-06		1.43333	-6.95e-05
1.43667	2.9e-05		1.43667	-1.05e-05		1.43667	-9.2e-05
1.44	2.45e-05		1.44	-1.25e-05		1.44	-0.000102
1.44333	1.95e-05		1.44333	-7e-06		1.44333	-9.35e-05
1.44667	2e-05		1.44667	-8e-06		1.44667	-9.6e-05
1.45	2e-05		1.45	-3.5e-06		1.45	-9.85e-05
1.45333	1.75e-05		1.45333	6e-06		1.45333	-0.000101
1.45667	1.25e-05		1.45667	2e-06		1.45667	-9.7e-05
1.46	1.1e-05		1.46	-4.5e-06		1.46	-8.15e-05
1.46333	1.35e-05		1.46333	1.15e-05		1.46333	-7e-05
1.46667	1.9e-05		1.46667	2.4e-05		1.46667	-6.65e-05
1.47	2.65e-05		1.47	1.85e-05		1.47	-7.15e-05
1.47333	1.3e-05		1.47333	8.5e-06		1.47333	-8.55e-05
1.47667	-2e-06		1.47667	2e-06		1.47667	-8.45e-05
1.48	1.1e-05		1.48	-5e-06		1.48	-8.05e-05
1.48333	2.05e-05		1.48333	1e-06		1.48333	-9.2e-05
1.48667	1.95e-05		1.48667	6.5e-06		1.48667	-8.5e-05
1.49	2.3e-05		1.49	2e-06		1.49	-8.05e-05
1.49333	2.4e-05		1.49333	1e-06		1.49333	-8.8e-05
1.49667	2e-05		1.49667	1e-06		1.49667	-8.9e-05
1.5	1.05e-05		1.5	1.5e-06		1.5	-9.15e-05
1.50333	9.5e-06		1.50333	3e-06		1.50333	-8.3e-05
1.50667	2e-05		1.50667	7.5e-06		1.50667	-7.85e-05
1.51	2.65e-05		1.51	1.3e-05		1.51	-8.2e-05
1.51333	2.15e-05		1.51333	1.6e-05		1.51333	-7.9e-05
1.51667	1.8e-05		1.51667	1.95e-05		1.51667	-7.45e-05
1.52	2.15e-05		1.52	2.1e-05		1.52	-6.65e-05
1.52333	2.6e-05		1.52333	1.75e-05		1.52333	-5.9e-05
1.52667	2.9e-05		1.52667	9.5e-06		1.52667	-7.1e-05
1.53	2.9e-05		1.53	1e-05		1.53	-8.4e-05
1.53333	2.75e-05		1.53333	1.2e-05		1.53333	-7.9e-05
1.53667	2.4e-05		1.53667	1e-06		1.53667	-7.6e-05
1.54	2.05e-05		1.54	4e-06		1.54	-8.8e-05
1.54333	2.5e-05		1.54333	1.6e-05		1.54333	-9.65e-05
1.54667	2.1e-05		1.54667	2.05e-05		1.54667	-8.45e-05
1.55	1.2e-05		1.55	2.3e-05		1.55	-8.4e-05
1.55333	1.85e-05		1.55333	1.35e-05		1.55333	-9.4e-05
1.55667	2.4e-05		1.55667	6e-06		1.55667	-9.5e-05
1.56	2.2e-05		1.56	1.85e-05		1.56	-0.0001035
1.56333	2.1e-05		1.56333	2.2e-05		1.56333	-0.000116
1.56667	1.8e-05		1.56667	5e-06		1.56667	-0.0001075
1.57	1.6e-05		1.57	1.5e-06		1.57	-9.25e-05
1.57333	2.25e-05		1.57333	9.5e-06		1.57333	-9.35e-05
1.57667	2.9e-05		1.57667	5e-06		1.57667	-8.8e-05
1.58	3.8e-05		1.58	-1.5e-06		1.58	-8.7e-05
1.58333	3.65e-05		1.58333	8.5e-06		1.58333	-8.9e-05
1.58667	1.65e-05		1.58667	1.55e-05		1.58667	-7.95e-05
1.59	9.5e-06		1.59	1.35e-05		1.59	-7.55e-05
1.59333	1.05e-05		1.59333	1e-05		1.59333	-7.55e-05
1.59667	1.05e-05		1.59667	2.5e-06		1.59667	-8.3e-05
1.6	1.85e-05		1.6	-2.5e-06		1.6	-9.2e-05
1.60333	2.5e-05		1.60333	3e-06		1.60333	-9.5e-05
1.60667	2.85e-05		1.60667	4.5e-06		1.60667	-9.35e-05
1.61	3.35e-05		1.61	-2e-06		1.61	-9.2e-05
1.61333	3.1e-05		1.61333	-2.5e-06		1.61333	-9.8e-05
1.61667	2.1e-05		1.61667	8e-06		1.61667	-9.55e-05
1.62	2.4e-05		1.62	1.35e-05		1.62	-9.05e-05
1.62333	3.5e-05		1.62333	1.05e-05		1.62333	-7.85e-05
1.62667	3.25e-05		1.62667	-3e-06		1.62667	-6.75e-05
1.63	1.9e-05		1.63	-4.5e-06		1.63	-8.55e-05
1.63333	1.2e-05		1.63333	5.5e-06		1.63333	-9.45e-05
1.63667	1.6e-05		1.63667	1.5e-06		1.63667	-8.95e-05
1.64	2.25e-05		1.64	3.5e-06		1.64	-8.75e-05
1.64333	2.8e-05		1.64333	1.4e-05		1.64333	-8.45e-05
1.64667	3.25e-05		1.64667	2.5e-06		1.64667	-8.1e-05
1.65	3.55e-05		1.65	-5e-06		1.65	-8.6e-05
1.65333	2.9e-05		1.65333	1e-05		1.65333	-8.95e-05
1.65667	1.3e-05		1.65667	1e-05		1.65667	-8.7e-05
1.66	5.5e-06		1.66	5e-07		1.66	-9.05e-05
1.66333	1.85e-05		1.66333	-4.5e-06		1.66333	-8.75e-05
1.66667	2.3e-05		1.66667	-1e-06		1.66667	-8.5e-05
1.67	2e-05		1.67	-5e-07		1.67	-8.3e-05
1.67333	2.15e-05		1.67333	-8e-06		1.67333	-7.4e-05
1.67667	1.35e-05		1.67667	-1.2e-05		1.67667	-7.25e-05
1.68	1.2e-05		1.68	-8.5e-06		1.68	-7.3e-05
1.68333	1.85e-05		1.68333	-1.5e-06		1.68333	-7.45e-05
1.68667	2.85e-05		1.68667	4.5e-06		1.68667	-8e-05
1.69	3.2e-05		1.69	7e-06		1.69	-7.45e-05
1.69333	2.55e-05		1.69333	7.5e-06		1.69333	-7.45e-05
1.69667	2e-05		1.69667	-6.5e-06		1.69667	-8.65e-05
1.7	2e-05		1.7	-1.25e-05		1.7	-8.75e-05
1.70333	1.65e-05		1.70333	4e-06		1.70333	-8.2e-05
1.70667	1.8e-05		1.70667	7e-06		1.70667	-8.5e-05
1.71	1.75e-05		1.71	7.5e-06		1.71	-8.45e-05
1.71333	1.4e-05		1.71333	1.45e-05		1.71333	-8.2e-05
1.71667	3.05e-05		1.71667	1.1e-05		1.71667	-8.35e-05
1.72	2.9e-05		1.72	-8.5e-06		1.72	-8.25e-05
1.72333	1.25e-05		1.72333	-1.25e-05		1.72333	-8.45e-05
1.72667	1.5e-05		1.72667	2e-06		1.72667	-8.35e-05
1.73	1e-05		1.73	5e-07		1.73	-7.3e-05
1.73333	1.8e-05		1.73333	-6e-06		1.73333	-7.35e-05
1.73667	2.6e-05		1.73667	-6.5e-06		1.73667	-9.1e-05
1.74	1.6e-05		1.74	3e-06		1.74	-8.9e-05
1.74333	1.7e-05		1.74333	1.05e-05		1.74333	-8.6e-05
1.74667	2.6e-05		1.74667	5.5e-06		1.74667	-8.5e-05
1.75	2.45e-05		1.75	-1.25e-05		1.75	-8.1e-05
1.75333	1.2e-05		1.75333	-2.2e-05		1.75333	-9.4e-05
1.75667	1.7e-05		1.75667	1.5e-06		1.75667	-8.8e-05
1.76	2.35e-05		1.76	1.85e-05		1.76	-6.5e-05
1.76333	1.55e-05		1.76333	1.1e-05		1.76333	-6.25e-05
1.76667	1.9e-05		1.76667	1e-05		1.76667	-7.6e-05
1.77	2.4e-05		1.77	4e-06		1.77	-7.9e-05
1.77333	1.9e-05		1.77333	2e-06		1.77333	-7.3e-05
1.77667	1.95e-05		1.77667	9.5e-06		1.77667	-7.8e-05
1.78	2.1e-05		1.78	1.5e-06		1.78	-8.4e-05
1.78333	2.15e-05		1.78333	-2.5e-06		1.78333	-7.7e-05
1.78667	1.75e-05		1.78667	-5e-07		1.78667	-6.95e-05
1.79	1.55e-05		1.79	-5.5e-06		1.79	-6.35e-05
1.79333	2e-05		1.79333	-1.45e-05		1.79333	-7.55e-05
1.79667	2.2e-05		1.79667	-1.95e-05		1.79667	-8.75e-05
1.8	1.4e-05		1.8	-1.3e-05		1.8	-8.15e-05
1.80333	7.5e-06		1.80333	-2.5e-06		1.80333	-7.55e-05
1.80667	1.3e-05		1.80667	5.5e-06		1.80667	-8.1e-05
1.81	1.7e-05		1.81	1.15e-05		1.81	-8.35e-05
1.81333	2.25e-05		1.81333	6e-06		1.81333	-6.6e-05
1.81667	2.85e-05		1.81667	6.5e-06		1.81667	-5.25e-05
1.82	2.1e-05		1.82	1.1e-05		1.82	-5.85e-05
1.82333	4.5e-06		1.82333	1.4e-05		1.82333	-6.85e-05
1.82667	6e-06		1.82667	7e-06		1.82667	-7.75e-05
1.83	1.75e-05		1.83	-5e-07		1.83	-7.2e-05
1.83333	1.2e-05		1.83333	3.5e-06		1.83333	-6.7e-05
1.83667	1e-05		1.83667	-8e-06		1.83667	-7.75e-05
1.84	2.2e-05		1.84	-1.05e-05		1.84	-7.5e-05
1.84333	3.05e-05		1.84333	-3e-06		1.84333	-7.85e-05
1.84667	2.8e-05		1.84667	-2e-06		1.84667	-8.95e-05
1.85	1.95e-05		1.85	-7.5e-06		1.85	-8.8e-05
1.85333	1.6e-05		1.85333	-1.1e-05		1.85333	-7.8e-05
1.85667	2.9e-05		1.85667	-5.5e-06		1.85667	-6.7e-05
1.86	3.35e-05		1.86	2e-06		1.86	-6.9e-05
1.86333	2.55e-05		1.86333	2e-06		1.86333	-7.45e-05
1.86667	2.2e-05		1.86667	1e-05		1.86667	-7.65e-05
1.87	1.55e-05		1.87	1.35e-05		1.87	-7.45e-05
1.87333	1.5e-05		1.87333	-2.5e-06		1.87333	-7.45e-05
1.87667	2.15e-05		1.87667	-9.5e-06		1.87667	-7.4e-05
1.88	2.85e-05		1.88	-9e-06		1.88	-6.95e-05
1.88333	3.2e-05		1.88333	-5e-07		1.88333	-8.4e-05
1.88667	3.4e-05		1.88667	-4.5e-06		1.88667	-8.2e-05
1.89	3.3e-05		1.89	-1.05e-05		1.89	-6.5e-05
1.89333	1.9e-05		1.89333	0		1.89333	-7.35e-05
1.89667	1.05e-05		1.89667	1.2e-05		1.89667	-7.85e-05
1.9	7.5e-06		1.9	8.5e-06		1.9	-7.25e-05
1.90333	8e-06		1.90333	-9e-06		1.90333	-7.1e-05
1.90667	1.75e-05		1.90667	-1.75e-05		1.90667	-6.8e-05
1.91	2.25e-05		1.91	-1.4e-05		1.91	-6e-05
1.91333	3e-05		1.91333	-1.65e-05		1.91333	-6.45e-05
1.91667	3.35e-05		1.91667	-1.5e-05		1.91667	-7.95e-05
1.92	2.45e-05		1.92	-3.5e-06		1.92	-7.75e-05
1.92333	2.65e-05		1.92333	0		1.92333	-7.4e-05
1.92667	2.5e-05		1.92667	5e-07		1.92667	-7.65e-05
1.93	2.1e-05		1.93	6e-06		1.93	-8.35e-05
1.93333	1.6e-05		1.93333	5.5e-06		1.93333	-9.45e-05
1.93667	1.1e-05		1.93667	-1e-06		1.93667	-9.35e-05
1.94	1.65e-05		1.94	0		1.94	-8.9e-05
1.94333	1.3e-05		1.94333	-2.5e-06		1.94333	-8.75e-05
1.94667	1.35e-05		1.94667	-5e-06		1.94667	-7.6e-05
1.95	1.7e-05		1.95	-1e-05		1.95	-7.1e-05
1.95333	1.55e-05		1.95333	-5e-07		1.95333	-6.8e-05
1.95667	1.25e-05		1.95667	6.5e-06		1.95667	-5.6e-05
1.96	1.3e-05		1.96	-4e-06		1.96	-5.75e-05
1.96333	1.9e-05		1.96333	-5.5e-06		1.96333	-7.1e-05
1.96667	2e-05		1.96667	0		1.96667	-7e-05
1.97	1.6e-05		1.97	1.5e-06		1.97	-5.9e-05
1.97333	8e-06		1.97333	2.5e-06		1.97333	-6e-05
1.97667	8e-06		1.97667	5.5e-06		1.97667	-6.55e-05
1.98	1.75e-05		1.98	7.5e-06		1.98	-7.1e-05
1.98333	1.9e-05		1.98333	1.1e-05		1.98333	-6.7e-05
1.98667	1.4e-05		1.98667	5e-06		1.98667	-6.6e-05
1.99	1.85e-05		1.99	-6e-06		1.99	-7.45e-05
1.99333	1.85e-05		1.99333	-7e-06		1.99333	-6.9e-05
1.99667	1.55e-05		1.99667	-6e-06		1.99667	-7.3e-05
2	1.05e-05		2	-6e-06		2	-7.15e-05
2.00333	1.05e-05		2.00333	3e-06		2.00333	-6.7e-05
2.00667	2.45e-05		2.00667	3.5e-06		2.00667	-6.45e-05
2.01	1.9e-05		2.01	-2e-06		2.01	-5.85e-05
2.01333	1.35e-05		2.01333	-9e-06		2.01333	-6.45e-05
2.01667	1.95e-05		2.01667	-7e-06		2.01667	-6.8e-05
2.02	1.6e-05		2.02	-4e-06		2.02	-6.45e-05
2.02333	5.5e-06		2.02333	-8.5e-06		2.02333	-6.25e-05
2.02667	1.4e-05		2.02667	4e-06		2.02667	-6.25e-05
2.03	3.4e-05		2.03	1.2e-05		2.03	-7.05e-05
2.03333	3.85e-05		2.03333	4e-06		2.03333	-8.45e-05
2.03667	3.4e-05		2.03667	3.5e-06		2.03667	-8.85e-05
2.04	3.35e-05		2.04	5e-06		2.04	-8.45e-05
2.04333	2.9e-05		2.04333	2.5e-06		2.04333	-6.85e-05
2.04667	2.4e-05		2.04667	7.5e-06		2.04667	-5.1e-05
2.05	2.8e-05		2.05	8.5e-06		2.05	-5.05e-05
2.05333	2e-05		2.05333	-5e-07		2.05333	-6.45e-05
2.05667	1.2e-05		2.05667	5.5e-06		2.05667	-7.4e-05
2.06	1.85e-05		2.06	1.45e-05		2.06	-5.75e-05
2.06333	1.55e-05		2.06333	8.5e-06		2.06333	-5.1e-05
2.06667	1.45e-05		2.06667	-1.5e-06		2.06667	-6.25e-05
2.07	2.2e-05		2.07	-8e-06		2.07	-6.85e-05
2.07333	2.2e-05		2.07333	-6e-06		2.07333	-6.65e-05
2.07667	1.7e-05		2.07667	-3e-06		2.07667	-5.6e-05
2.08	1.8e-05		2.08	1.5e-06		2.08	-5.1e-05
2.08333	2.9e-05		2.08333	8.5e-06		2.08333	-5.85e-05
2.08667	3.6e-05		2.08667	-3e-06		2.08667	-6.3e-05
2.09	2.75e-05		2.09	-4.5e-06		2.09	-6.3e-05
2.09333	2.25e-05		2.09333	1.15e-05		2.09333	-6.6e-05
2.09667	2.1e-05		2.09667	2.5e-06		2.09667	-6.65e-05
2.1	2.1e-05		2.1	-1.45e-05		2.1	-6.8e-05
2.10333	2.25e-05		2.10333	-1.45e-05		2.10333	-6.1e-05
2.10667	2.15e-05		2.10667	-5.5e-06		2.10667	-5.7e-05
2.11	2.35e-05		2.11	-2e-06		2.11	-6e-05
2.11333	2.35e-05		2.11333	3e-06		2.11333	-5.75e-05
2.11667	2.1e-05		2.11667	-2.5e-06		2.11667	-6.05e-05
2.12	1.55e-05		2.12	-2e-06		2.12	-5.95e-05
2.12333	2e-05		2.12333	9.5e-06		2.12333	-5.25e-05
2.12667	2.5e-05		2.12667	0		2.12667	-5.1e-05
2.13	3.05e-05		2.13	-2e-06		2.13	-5.7e-05
2.13333	2.45e-05		2.13333	-2e-06		2.13333	-7e-05
2.13667	1.2e-05		2.13667	-8e-06		2.13667	-6.05e-05
2.14	1.4e-05		2.14	5e-06		2.14	-5.45e-05
2.14333	1.55e-05		2.14333	1.1e-05		2.14333	-6.2e-05
2.14667	1.55e-05		2.14667	-5e-07		2.14667	-6.85e-05
2.15	2.1e-05		2.15	-1e-06		2.15	-7.2e-05
2.15333	2.45e-05		2.15333	3e-06		2.15333	-7.9e-05
2.15667	2.5e-05		2.15667	1e-06		2.15667	-8.8e-05
2.16	2.95e-05		2.16	3e-06		2.16	-7.85e-05
2.16333	2.75e-05		2.16333	4.5e-06		2.16333	-7.4e-05
2.16667	2.5e-05		2.16667	4e-06		2.16667	-7.75e-05
2.17	2e-05		2.17	5e-07		2.17	-6.6e-05
2.17333	8e-06		2.17333	0		2.17333	-6.35e-05
2.17667	2e-06		2.17667	6e-06		2.17667	-7.5e-05
2.18	2.3e-05		2.18	9e-06		2.18	-6.15e-05
2.18333	3.55e-05		2.18333	4e-06		2.18333	-5.45e-05
2.18667	3.15e-05		2.18667	7e-06		2.18667	-6.35e-05
2.19	3.05e-05		2.19	3.5e-06		2.19	-6.25e-05
2.19333	2.1e-05		2.19333	1.5e-06		2.19333	-5.65e-05
2.19667	1.95e-05		2.19667	1.35e-05		2.19667	-4.55e-05
2.2	2.2e-05		2.2	5.5e-06		2.2	-4.15e-05
2.20333	1.45e-05		2.20333	1.5e-06		2.20333	-5.3e-05
2.20667	1.15e-05		2.20667	3e-06		2.20667	-4.5e-05
2.21	1.75e-05		2.21	3e-06		2.21	-3.8e-05
2.21333	1.9e-05		2.21333	-1e-06		2.21333	-5.3e-05
2.21667	1.8e-05		2.21667	-1.2e-05		2.21667	-6.25e-05
2.22	1.9e-05		2.22	-1.25e-05		2.22	-5.7e-05
2.22333	2.7e-05		2.22333	1e-06		2.22333	-5.2e-05
2.22667	3.6e-05		2.22667	4.5e-06		2.22667	-4.45e-05
2.23	3.2e-05		2.23	-4e-06		2.23	-4.35e-05
2.23333	2.4e-05		2.23333	-7e-06		2.23333	-5.25e-05
2.23667	2.15e-05		2.23667	-3.5e-06		2.23667	-5.65e-05
2.24	2.6e-05		2.24	-1.5e-06		2.24	-5.7e-05
2.24333	2.3e-05		2.24333	3.5e-06		2.24333	-5.35e-05
2.24667	1.55e-05		2.24667	4e-06		2.24667	-5.45e-05
2.25	2e-05		2.25	0		2.25	-4.2e-05
2.25333	2.6e-05		2.25333	8.5e-06		2.25333	-3.5e-05
2.25667	3.05e-05		2.25667	1.2e-05		2.25667	-5.05e-05
2.26	2.9e-05		2.26	1.15e-05		2.26	-5.4e-05
2.26333	3.8e-05		2.26333	9e-06		2.26333	-4e-05
2.26667	4.4e-05		2.26667	-5e-06		2.26667	-3.75e-05
2.27	3.4e-05		2.27	-1.25e-05		2.27	-4.2e-05
2.27333	2.05e-05		2.27333	-1.5e-06		2.27333	-5e-05
2.27667	1.3e-05		2.27667	2e-06		2.27667	-6.1e-05
2.28	2.15e-05		2.28	0		2.28	-4.8e-05
2.28333	2.75e-05		2.28333	4.5e-06		2.28333	-2.95e-05
2.28667	2.3e-05		2.28667	0		2.28667	-3.75e-05
2.29	1.95e-05		2.29	1e-06		2.29	-5.85e-05
2.29333	1.25e-05		2.29333	8e-06		2.29333	-6.05e-05
2.29667	5.5e-06		2.29667	1.5e-06		2.29667	-4.8e-05
2.3	1e-05		2.3	-9e-06		2.3	-3.8e-05
2.30333	1.1e-05		2.30333	-1.25e-05		2.30333	-3e-05
2.30667	2e-05		2.30667	-3e-06		2.30667	-3.25e-05
2.31	2.5e-05		2.31	4.5e-06		2.31	-3.9e-05
2.31333	2.45e-05		2.31333	-7.5e-06		2.31333	-3.95e-05
2.31667	3.65e-05		2.31667	-1.2e-05		2.31667	-4.05e-05
2.32	2.45e-05		2.32	-6.5e-06		2.32	-4e-05
2.32333	8.5e-06		2.32333	5.5e-06		2.32333	-3.85e-05
2.32667	9.5e-06		2.32667	9e-06		2.32667	-4.2e-05
2.33	1.1e-05		2.33	2e-06		2.33	-4e-05
2.33333	1.8e-05		2.33333	3.5e-06		2.33333	-3.65e-05
2.33667	3e-05		2.33667	-1.5e-06		2.33667	-4.15e-05
2.34	2.85e-05		2.34	-4.5e-06		2.34	-4.2e-05
2.34333	2.3e-05		2.34333	3.5e-06		2.34333	-4.45e-05
2.34667	2.7e-05		2.34667	1e-05		2.34667	-5.4e-05
2.35	2.6e-05		2.35	0		2.35	-5.75e-05
2.35333	2e-05		2.35333	-4.5e-06		2.35333	-4.1e-05
2.35667	2.6e-05		2.35667	-2.5e-06		2.35667	-3.05e-05
2.36	2.55e-05		2.36	-1.5e-06		2.36	-3.3e-05
2.36333	2.15e-05		2.36333	1.5e-05		2.36333	-3.85e-05
2.36667	2.5e-05		2.36667	2.2e-05		2.36667	-4.75e-05
2.37	2.45e-05		2.37	9.5e-06		2.37	-4.15e-05
2.37333	2.45e-05		2.37333	1.5e-06		2.37333	-3.7e-05
2.37667	1.9e-05		2.37667	-3.5e-06		2.37667	-3.85e-05
2.38	2.05e-05		2.38	-1.1e-05		2.38	-3.35e-05
2.38333	2.25e-05		2.38333	-1.3e-05		2.38333	-2.7e-05
2.38667	7e-06		2.38667	-1.5e-05		2.38667	-2.9e-05
2.39	1.5e-06		2.39	-8e-06		2.39	-3.4e-05
2.39333	1.65e-05		2.39333	6e-06		2.39333	-2.65e-05
2.39667	2e-05		2.39667	1.3e-05		2.39667	-2.75e-05
2.4	2.35e-05		2.4	1.2e-05		2.4	-3.75e-05
2.40333	2.7e-05		2.40333	2e-06		2.40333	-3.3e-05
2.40667	2.2e-05		2.40667	9e-06		2.40667	-2.75e-05
2.41	2.3e-05		2.41	9e-06		2.41	-3.5e-05
2.41333	1.95e-05		2.41333	-1e-06		2.41333	-4.7e-05
2.41667	1.9e-05		2.41667	7.5e-06		2.41667	-4.25e-05
2.42	2.6e-05		2.42	9e-06		2.42	-3.3e-05
2.42333	2.85e-05		2.42333	4.5e-06		2.42333	-2.6e-05
2.42667	2.65e-05		2.42667	0		2.42667	-1.85e-05
2.43	2.95e-05		2.43	-3e-06		2.43	-1.75e-05
2.43333	2.85e-05		2.43333	2.5e-06		2.43333	-1.7e-05
2.43667	2.6e-05		2.43667	8.5e-06		2.43667	-2.25e-05
2.44	2.4e-05		2.44	6.5e-06		2.44	-3.5e-05
2.44333	2.25e-05		2.44333	4.5e-06		2.44333	-4.85e-05
2.44667	1.8e-05		2.44667	9e-06		2.44667	-4.1e-05
2.45	1.05e-05		2.45	8e-06		2.45	-3.2e-05
2.45333	1.35e-05		2.45333	4.5e-06		2.45333	-3.35e-05
2.45667	1.7e-05		2.45667	5e-06		2.45667	-2.1e-05
2.46	2e-05		2.46	1.05e-05		2.46	-2.85e-05
2.46333	3.15e-05		2.46333	3.5e-06		2.46333	-4.95e-05
2.46667	4.05e-05		2.46667	1e-06		2.46667	-5.4e-05
2.47	3.85e-05		2.47	7.5e-06		2.47	-4.8e-05
2.47333	3.1e-05		2.47333	0		2.47333	-3.85e-05
2.47667	2.45e-05		2.47667	1.5e-06		2.47667	-2.65e-05
2.48	3.4e-05		2.48	1e-06		2.48	-2.2e-05
2.48333	3.25e-05		2.48333	-1.1e-05		2.48333	-3.15e-05
2.48667	2.45e-05		2.48667	-1.6e-05		2.48667	-3.5e-05
2.49	3.9e-05		2.49	-7e-06		2.49	-2.75e-05
2.49333	4.6e-05		2.49333	0		2.49333	-2.65e-05
2.49667	3.2e-05		2.49667	-5e-07		2.49667	-1.6e-05
2.5	3.3e-05		2.5	1e-06		2.5	-4.5e-06
2.50333	3.85e-05		2.50333	-6e-06		2.50333	-1.75e-05
2.50667	3.15e-05		2.50667	-7e-06		2.50667	-3.55e-05
2.51	1.75e-05		2.51	1.15e-05		2.51	-3.25e-05
2.51333	1.55e-05		2.51333	8e-06		2.51333	-1.85e-05
2.51667	3.1e-05		2.51667	-2.5e-06		2.51667	-2e-05
2.52	3.25e-05		2.52	1.15e-05		2.52	-2.85e-05
2.52333	3.65e-05		2.52333	1.1e-05		2.52333	-2.45e-05
2.52667	4.4e-05		2.52667	1.2e-05		2.52667	-2e-05
2.53	4e-05		2.53	1.9e-05		2.53	-2.75e-05
2.53333	3.25e-05		2.53333	1.15e-05		2.53333	-2.2e-05
2.53667	2.55e-05		2.53667	-6.5e-06		2.53667	-1.2e-05
2.54	2.35e-05		2.54	-1.5e-05		2.54	-1.75e-05
2.54333	2.75e-05		2.54333	-5e-06		2.54333	-2.65e-05
2.54667	2.65e-05		2.54667	-1e-06		2.54667	-2.55e-05
2.55	2.55e-05		2.55	-3.5e-06		2.55	-1.65e-05
2.55333	2.5e-05		2.55333	-4e-06		2.55333	-1.55e-05
2.55667	3.05e-05		2.55667	-5.5e-06		2.55667	-2.45e-05
2.56	3.45e-05		2.56	-9.5e-06		2.56	-2.45e-05
2.56333	2.3e-05		2.56333	2.5e-06		2.56333	-1.75e-05
2.56667	1.8e-05		2.56667	1.45e-05		2.56667	-1.95e-05
2.57	2.35e-05		2.57	2.5e-06		2.57	-1.5e-05
2.57333	2.2e-05		2.57333	-5e-06		2.57333	-4.5e-06
2.57667	1.65e-05		2.57667	-1.4e-05		2.57667	-1.4e-05
2.58	2.5e-05		2.58	-2.5e-05		2.58	-1.95e-05
2.58333	3.25e-05		2.58333	-1.75e-05		2.58333	-1.15e-05
2.58667	2.5e-05		2.58667	-4.5e-06		2.58667	-1.65e-05
2.59	2.85e-05		2.59	6e-06		2.59	-2.4e-05
2.59333	2.9e-05		2.59333	3e-06		2.59333	-1.55e-05
2.59667	2.15e-05		2.59667	-6e-06		2.59667	5e-07
2.6	1.15e-05		2.6	-9e-06		2.6	2.5e-06
2.60333	2.2e-05		2.60333	-1.5e-06		2.60333	-7.5e-06
2.60667	4.05e-05		2.60667	-2.5e-06		2.60667	-1.6e-05
2.61	3.95e-05		2.61	-9.5e-06		2.61	-7.5e-06
2.61333	4.3e-05		2.61333	-3e-06		2.61333	5.5e-06
2.61667	4.35e-05		2.61667	4.5e-06		2.61667	2.5e-06
2.62	3.6e-05		2.62	9e-06		2.62	3.5e-06
2.62333	3.35e-05		2.62333	9e-06		2.62333	6.5e-06
2.62667	3.15e-05		2.62667	1e-05		2.62667	-5.5e-06
2.63	3.35e-05		2.63	0		2.63	-1.55e-05
2.63333	3.7e-05		2.63333	-1e-06		2.63333	-2.15e-05
2.63667	2.9e-05		2.63667	2e-06		2.63667	-3.15e-05
2.64	2.6e-05		2.64	-8e-06		2.64	-2.55e-05
2.64333	2.45e-05		2.64333	-6.5e-06		2.64333	-1.1e-05
2.64667	2.65e-05		2.64667	6e-06		2.64667	-8.5e-06
2.65	3.35e-05		2.65	9.5e-06		2.65	-9e-06
2.65333	4.25e-05		2.65333	-1e-06		2.65333	-1.3e-05
2.65667	5.15e-05		2.65667	-8e-06		2.65667	-8.5e-06
2.66	4.3e-05		2.66	-1.1e-05		2.66	-2.5e-06
2.66333	3.4e-05		2.66333	-1.2e-05		2.66333	-8e-06
2.66667	3.5e-05		2.66667	-1.7e-05		2.66667	-4.5e-06
2.67	3.35e-05		2.67	-1.05e-05		2.67	-6e-06
2.67333	3.05e-05		2.67333	-2.5e-06		2.67333	-8e-06
2.67667	3.6e-05		2.67667	-3e-06		2.67667	-2.5e-06
2.68	4.3e-05		2.68	6e-06		2.68	2e-06
2.68333	2.85e-05		2.68333	1e-05		2.68333	-1e-06
2.68667	1.5e-05		2.68667	6.5e-06		2.68667	-1.35e-05
2.69	2.1e-05		2.69	-5e-06		2.69	-9.5e-06
2.69333	3.25e-05		2.69333	-1.1e-05		2.69333	-5.5e-06
2.69667	4.05e-05		2.69667	-6e-06		2.69667	-5.5e-06
2.7	3.75e-05		2.7	3e-06		2.7	-6.5e-06
2.70333	3.85e-05		2.70333	2e-06		2.70333	-8.5e-06
2.70667	3.55e-05		2.70667	-1e-06		2.70667	-2.5e-06
2.71	2.95e-05		2.71	5e-06		2.71	-1.5e-06
2.71333	2.45e-05		2.71333	9.5e-06		2.71333	-2e-06
2.71667	2.9e-05		2.71667	4e-06		2.71667	-5e-07
2.72	3.2e-05		2.72	-7e-06		2.72	-3e-06
2.72333	2.2e-05		2.72333	-9.5e-06		2.72333	-6.5e-06
2.72667	2.25e-05		2.72667	-5.5e-06		2.72667	-6.5e-06
2.73	2.05e-05		2.73	-6e-06		2.73	-3.5e-06
2.73333	2.25e-05		2.73333	-1.15e-05		2.73333	-5.5e-06
2.73667	3.1e-05		2.73667	-1e-05		2.73667	-9e-06
2.74	3.35e-05		2.74	-4e-06		2.74	-9e-06
2.74333	3.5e-05		2.74333	0		2.74333	-1e-05
2.74667	3.3e-05		2.74667	4.5e-06		2.74667	-3.5e-06
2.75	3.8e-05		2.75	6e-06		2.75	1.15e-05
2.75333	4.6e-05		2.75333	-1.5e-06		2.75333	1.35e-05
2.75667	4.85e-05		2.75667	-7e-06		2.75667	-4.5e-06
2.76	3.4e-05		2.76	-5.5e-06		2.76	-1.5e-05
2.76333	3e-05		2.76333	2e-06		2.76333	-6.5e-06
2.76667	4.25e-05		2.76667	2e-06		2.76667	3.5e-06
2.77	3.5e-05		2.77	4e-06		2.77	4.5e-06
2.77333	2.65e-05		2.77333	1e-06		2.77333	9e-06
2.77667	3.05e-05		2.77667	-4.5e-06		2.77667	1.55e-05
2.78	3.35e-05		2.78	-4.5e-06		2.78	5e-07
2.78333	3.65e-05		2.78333	-1.5e-05		2.78333	-1.2e-05
2.78667	3.15e-05		2.78667	-1.2e-05		2.78667	5e-07
2.79	2.5e-05		2.79	-1.2e-05		2.79	1.05e-05
2.79333	2.15e-05		2.79333	-2.2e-05		2.79333	1.25e-05
2.79667	2.05e-05		2.79667	-2.15e-05		2.79667	7.5e-06
2.8	2.85e-05		2.8	-2.9e-05		2.8	7e-06
2.80333	3e-05		2.80333	-1.8e-05		2.80333	2.05e-05
2.80667	2.9e-05		2.80667	7.5e-06		2.80667	1.75e-05
2.81	3.6e-05		2.81	1.2e-05		2.81	4.5e-06
2.81333	3.75e-05		2.81333	9e-06		2.81333	9.5e-06
2.81667	3.05e-05		2.81667	2e-06		2.81667	2.15e-05
2.82	3.45e-05		2.82	-9e-06		2.82	1.4e-05
2.82333	3.65e-05		2.82333	-5.5e-06		2.82333	6e-06
2.82667	2.9e-05		2.82667	2e-06		2.82667	7e-06
2.83	2.3e-05		2.83	1.1e-05		2.83	8.5e-06
2.83333	2.8e-05		2.83333	1.35e-05		2.83333	6.5e-06
2.83667	3.85e-05		2.83667	4.5e-06		2.83667	2e-06
2.84	3e-05		2.84	-9.5e-06		2.84	5.5e-06
2.84333	2.8e-05		2.84333	-1.15e-05		2.84333	1.95e-05
2.84667	3.9e-05		2.84667	-7e-06		2.84667	2.55e-05
2.85	4.5e-05		2.85	-8e-06		2.85	2.05e-05
2.85333	3.45e-05		2.85333	3e-06		2.85333	1.9e-05
2.85667	3.1e-05		2.85667	3.5e-06		2.85667	1.6e-05
2.86	3.5e-05		2.86	3e-06		2.86	1.1e-05
2.86333	2.9e-05		2.86333	1.5e-06		2.86333	4e-06
2.86667	2.4e-05		2.86667	-8.5e-06		2.86667	5e-06
2.87	2.5e-05		2.87	-1.45e-05		2.87	1.45e-05
2.87333	2.5e-05		2.87333	-2.1e-05		2.87333	1.8e-05
2.87667	2.55e-05		2.87667	-1.65e-05		2.87667	1.2e-05
2.88	2.85e-05		2.88	-6.5e-06		2.88	8.5e-06
2.88333	2.7e-05		2.88333	-1.25e-05		2.88333	8e-06
2.88667	2.6e-05		2.88667	-1.7e-05		2.88667	1.2e-05
2.89	2.7e-05		2.89	-1.25e-05		2.89	2.1e-05
2.89333	2.65e-05		2.89333	-1.05e-05		2.89333	3.95e-05
2.89667	3.1e-05		2.89667	-1.8e-05		2.89667	3.9e-05
2.9	3.25e-05		2.9	-1.25e-05		2.9	1.5e-05
2.90333	3.35e-05		2.90333	-5e-06		2.90333	5e-06
2.90667	3.25e-05		2.90667	-1.35e-05		2.90667	1.85e-05
2.91	2.95e-05		2.91	-7e-06		2.91	2.6e-05
2.91333	3.4e-05		2.91333	2e-06		2.91333	2.2e-05
2.91667	3.15e-05		2.91667	3.5e-06		2.91667	3.35e-05
2.92	3.25e-05		2.92	7.5e-06		2.92	3.75e-05
2.92333	3.9e-05		2.92333	1.5e-06		2.92333	3.45e-05
2.92667	3.2e-05		2.92667	-8e-06		2.92667	2.7e-05
2.93	2.55e-05		2.93	-5.5e-06		2.93	2.55e-05
2.93333	3.6e-05		2.93333	3.5e-06		2.93333	2.95e-05
2.93667	4.7e-05		2.93667	-1.5e-06		2.93667	2.3e-05
2.94	4.9e-05		2.94	-1.2e-05		2.94	2.4e-05
2.94333	3.95e-05		2.94333	-6e-06		2.94333	2.85e-05
2.94667	3.05e-05		2.94667	-5e-07		2.94667	3.1e-05
2.95	3.2e-05		2.95	-2e-06		2.95	3.6e-05
2.95333	2.9e-05		2.95333	-4e-06		2.95333	3.1e-05
2.95667	2.95e-05		2.95667	-6e-06		2.95667	2.6e-05
2.96	3.55e-05		2.96	-5.5e-06		2.96	2.2e-05
2.96333	3.85e-05		2.96333	-5e-06		2.96333	2.85e-05
2.96667	2.7e-05		2.96667	3e-06		2.96667	3.95e-05
2.97	1.85e-05		2.97	7.5e-06		2.97	3.85e-05
2.97333	3.15e-05		2.97333	-7e-06		2.97333	3.05e-05
2.97667	3.4e-05		2.97667	-1.65e-05		2.97667	1.95e-05
2.98	3.25e-05		2.98	-5e-06		2.98	1.7e-05
2.98333	3.2e-05		2.98333	1.5e-06		2.98333	1.65e-05
2.98667	2.35e-05		2.98667	0		2.98667	2.75e-05
2.99	3.6e-05		2.99	2e-06		2.99	2.95e-05
2.99333	4.2e-05		2.99333	-6e-06		2.99333	2.8e-05
2.99667	3.25e-05		2.99667	-1.4e-05		2.99667	4e-05
3	4.25e-05		3	-2.5e-05		3	3.4e-05
3.00333	4.85e-05		3.00333	-2.45e-05		3.00333	2.7e-05
3.00667	4.3e-05		3.00667	-2e-05		3.00667	3.65e-05
3.01	3.7e-05		3.01	-1.6e-05		3.01	3.45e-05
3.01333	4.55e-05		3.01333	-1e-05		3.01333	3.2e-05
3.01667	5.15e-05		3.01667	-9.5e-06		3.01667	3.5e-05
3.02	3.65e-05		3.02	-1.35e-05		3.02	3e-05
3.02333	3.2e-05		3.02333	-2.5e-06		3.02333	3.85e-05
3.02667	3.85e-05		3.02667	7e-06		3.02667	4.45e-05
3.03	3.8e-05		3.03	-7.5e-06		3.03	3.6e-05
3.03333	4e-05		3.03333	-1.7e-05		3.03333	2e-05
3.03667	4.65e-05		3.03667	-9e-06		3.03667	1.35e-05
3.04	4.45e-05		3.04	3.5e-06		3.04	2e-05
3.04333	2.8e-05		3.04333	7.5e-06		3.04333	2.7e-05
3.04667	1.85e-05		3.04667	-5e-07		3.04667	3.75e-05
3.05	2.75e-05		3.05	-5e-06		3.05	3.85e-05
3.05333	3.45e-05		3.05333	-2e-06		3.05333	2.9e-05
3.05667	4e-05		3.05667	-1.3e-05		3.05667	3.2e-05
3.06	4.55e-05		3.06	-9.5e-06		3.06	5.6e-05
3.06333	4.55e-05		3.06333	-5e-07		3.06333	5.8e-05
3.06667	4.85e-05		3.06667	-4e-06		3.06667	4.35e-05
3.07	4.4e-05		3.07	-6e-06		3.07	4.2e-05
3.07333	3.55e-05		3.07333	-1.15e-05		3.07333	4.3e-05
3.07667	2.9e-05		3.07667	-1e-05		3.07667	3.3e-05
3.08	2.55e-05		3.08	-1.35e-05		3.08	3.2e-05
3.08333	2.9e-05		3.08333	-1.8e-05		3.08333	4.25e-05
3.08667	3.15e-05		3.08667	-1.05e-05		3.08667	4.9e-05
3.09	3.45e-05		3.09	-7.5e-06		3.09	6.05e-05
3.09333	2.8e-05		3.09333	-6.5e-06		3.09333	6.1e-05
3.09667	2.8e-05		3.09667	-8.5e-06		3.09667	4.65e-05
3.1	4.2e-05		3.1	-4.5e-06		3.1	4.7e-05
3.10333	4.1e-05		3.10333	4e-06		3.10333	4.6e-05
3.10667	2.7e-05		3.10667	9e-06		3.10667	4.75e-05
3.11	2.6e-05		3.11	8e-06		3.11	4.95e-05
3.11333	2.9e-05		3.11333	2e-06		3.11333	4.45e-05
3.11667	3.05e-05		3.11667	-2e-06		3.11667	4.45e-05
3.12	3.05e-05		3.12	-8.5e-06		3.12	4.6e-05
3.12333	3.5e-05		3.12333	-5e-06		3.12333	5.2e-05
3.12667	4.3e-05		3.12667	1e-06		3.12667	5e-05
3.13	4.55e-05		3.13	-7e-06		3.13	4.55e-05
3.13333	3.95e-05		3.13333	-1.8e-05		3.13333	5.05e-05
3.13667	2.8e-05		3.13667	-1.25e-05		3.13667	4.55e-05
3.14	2.9e-05		3.14	1.5e-06		3.14	3.75e-05
3.14333	3.25e-05		3.14333	5e-06		3.14333	3.35e-05
3.14667	3.6e-05		3.14667	4e-06		3.14667	3.85e-05
3.15	3.8e-05		3.15	-3.5e-06		3.15	5.25e-05
3.15333	4.9e-05		3.15333	-1.1e-05		3.15333	5.8e-05
3.15667	5.15e-05		3.15667	-1.05e-05		3.15667	5.4e-05
3.16	4.15e-05		3.16	-2e-06		3.16	4.95e-05
3.16333	3.95e-05		3.16333	-1e-06		3.16333	5.05e-05
3.16667	4.2e-05		3.16667	-1.5e-06		3.16667	5.35e-05
3.17	4.1e-05		3.17	-5e-06		3.17	6.05e-05
3.17333	4.1e-05		3.17333	-1.5e-05		3.17333	6.65e-05
3.17667	4.45e-05		3.17667	-1.45e-05		3.17667	6.95e-05
3.18	3.5e-05		3.18	-1.05e-05		3.18	5.7e-05
3.18333	2.55e-05		3.18333	-5e-06		3.18333	4.85e-05
3.18667	2.4e-05		3.18667	-1e-06		3.18667	5.6e-05
3.19	3.35e-05		3.19	-1.5e-06		3.19	6e-05
3.19333	3.2e-05		3.19333	-1.35e-05		3.19333	6.9e-05
3.19667	3.6e-05		3.19667	-8e-06		3.19667	7.6e-05
3.2	4.15e-05		3.2	1.9e-05		3.2	6.95e-05
3.20333	3.1e-05		3.20333	2.35e-05		3.20333	6.05e-05
3.20667	2.65e-05		3.20667	6.5e-06		3.20667	5.8e-05
3.21	2.85e-05		3.21	-9.5e-06		3.21	4.6e-05
3.21333	2.8e-05		3.21333	-8e-06		3.21333	3.7e-05
3.21667	3.1e-05		3.21667	-6.5e-06		3.21667	4.2e-05
3.22	4.1e-05		3.22	-7.5e-06		3.22	4e-05
3.22333	4e-05		3.22333	-1.3e-05		3.22333	3.85e-05
3.22667	3.45e-05		3.22667	-1.1e-05		3.22667	5e-05
3.23	2.95e-05		3.23	-5.5e-06		3.23	5.5e-05
3.23333	3e-05		3.23333	1e-06		3.23333	4.6e-05
3.23667	3.55e-05		3.23667	4.5e-06		3.23667	4.35e-05
3.24	3.25e-05		3.24	-3e-06		3.24	4.75e-05
3.24333	2e-05		3.24333	2.5e-06		3.24333	3.8e-05
3.24667	2e-05		3.24667	8.5e-06		3.24667	3.6e-05
3.25	3.15e-05		3.25	5.5e-06		3.25	5.2e-05
3.25333	2.65e-05		3.25333	-6.5e-06		3.25333	5.1e-05
3.25667	1.7e-05		3.25667	-1.35e-05		3.25667	4e-05
3.26	2.6e-05		3.26	-1.45e-05		3.26	4.8e-05
3.26333	3.9e-05		3.26333	-1.2e-05		3.26333	6e-05
3.26667	5e-05		3.26667	-5e-07		3.26667	6.45e-05
3.27	6.65e-05		3.27	7e-06		3.27	7.55e-05
3.27333	7.75e-05		3.27333	6.5e-06		3.27333	8.95e-05
3.27667	9.9e-05		3.27667	1.9e-05		3.27667	0.0001095
3.28	0.000126		3.28	2.4e-05		3.28	0.0001455
3.28333	0.0001425		3.28333	2.6e-05		3.28333	0.000199
3.28667	0.000173		3.28667	4.9e-05		3.28667	0.000253
3.29	0.000212		3.29	7.6e-05		3.29	0.000305
3.29333	0.000276		3.29333	9.15e-05		3.29333	0.000375
3.29667	0.0003585		3.29667	0.000107		3.29667	0.0004745
3.3	0.0004475		3.3	0.000152		3.3	0.000593
3.30333	0.00057		3.30333	0.000219		3.30333	0.0007455
3.30667	0.000716		3.30667	0.000293		3.30667	0.000945
3.31	0.000896		3.31	0.0003805		3.31	0.0011635
3.31333	0.0011185		3.31333	0.000501		3.31333	0.0014465
3.31667	0.001392		3.31667	0.000659		3.31667	0.0018005
3.32	0.00174		3.32	0.0008405		3.32	0.0021865
3.32333	0.0021425		3.32333	0.001059		3.32333	0.0026305
3.32667	0.0025945		3.32667	0.0013305		3.32667	0.003148
3.33	0.003122		3.33	0.00166		3.33	0.0037515
3.33333	0.003721		3.33333	0.0020565		3.33333	0.0044195
3.33667	0.0044015		3.33667	0.0024955		3.33667	0.005122
3.34	0.005148		3.34	0.0029745		3.34	0.0058635
3.34333	0.005929		3.34333	0.0035		3.34333	0.0066445
3.34667	0.00674		3.34667	0.004041		3.34667	0.0074455
3.35	0.007575		3.35	0.0045965		3.35	0.0082345
3.35333	0.008415		3.35333	0.005178		3.35333	0.008997
3.35667	0.009215		3.35667	0.0057615		3.35667	0.009724
3.36	0.0099675		3.36	0.006319		3.36	0.01041
3.36333	0.010693		3.36333	0.006832		3.36333	0.0110645
3.36667	0.0113685		3.36667	0.007294		3.36667	0.0116715
3.37	0.011961		3.37	0.007711		3.37	0.012217
3.37333	0.0125015		3.37333	0.008087		3.37333	0.01268
3.37667	0.0129765		3.37667	0.0084145		3.37667	0.0130585
3.38	0.0133885		3.38	0.008691		3.38	0.013364
3.38333	0.013747		3.38333	0.0089145		3.38333	0.013583
3.38667	0.014038		3.38667	0.009063		3.38667	0.0137085
3.39	0.014275		3.39	0.0091295		3.39	0.013746
3.39333	0.0144645		3.39333	0.009126		3.39333	0.0136885
3.39667	0.014605		3.39667	0.009055		3.39667	0.0135325
3.4	0.0147225		3.4	0.0089435		3.4	0.013279
3.40333	0.014825		3.40333	0.008773		3.40333	0.012935
3.40667	0.0148935		3.40667	0.0085315		3.40667	0.012511
3.41	0.0149455		3.41	0.0082205		3.41	0.0120235
3.41333	0.0149935		3.41333	0.007848		3.41333	0.011472
3.41667	0.0150195		3.41667	0.0074165		3.41667	0.0108555
3.42	0.0150365		3.42	0.0069415		3.42	0.010182
3.42333	0.0150375		3.42333	0.0064395		3.42333	0.0094605
3.42667	0.0149955		3.42667	0.0058835		3.42667	0.0087275
3.43	0.014929		3.43	0.0052895		3.43	0.0079905
3.43333	0.014833		3.43333	0.0046725		3.43333	0.007239
3.43667	0.0147065		3.43667	0.004027		3.43667	0.0064815
3.44	0.014517		3.44	0.0033425		3.44	0.005706
3.44333	0.014265		3.44333	0.002661		3.44333	0.004923
3.44667	0.013975		3.44667	0.001998		3.44667	0.0041585
3.45	0.01362		3.45	0.001342		3.45	0.003408
3.45333	0.013184		3.45333	0.0007105		3.45333	0.002673
3.45667	0.0127015		3.45667	0.0001025		3.45667	0.0019615
3.46	0.0121835		3.46	-0.000477		3.46	0.0012875
3.46333	0.0116075		3.46333	-0.001026		3.46333	0.000651
3.46667	0.011005		3.46667	-0.001544		3.46667	2.5e-05
3.47	0.0104095		3.47	-0.0020105		3.47	-0.000572
3.47333	0.009792		3.47333	-0.002416		3.47333	-0.0011065
3.47667	0.0091445		3.47667	-0.002784		3.47667	-0.0015995
3.48	0.008493		3.48	-0.003125		3.48	-0.002071
3.48333	0.007858		3.48333	-0.0034295		3.48333	-0.0025185
3.48667	0.007241		3.48667	-0.0036765		3.48667	-0.002915
3.49	0.0066415		3.49	-0.0038925		3.49	-0.0032805
3.49333	0.006049		3.49333	-0.004087		3.49333	-0.0036155
3.49667	0.0054665		3.49667	-0.004235		3.49667	-0.0039135
3.5	0.004912		3.5	-0.0043485		3.5	-0.004203
3.50333	0.0043895		3.50333	-0.004443		3.50333	-0.004479
3.50667	0.00389		3.50667	-0.004515		3.50667	-0.0047255
3.51	0.003405		3.51	-0.004565		3.51	-0.0049405
3.51333	0.0029505		3.51333	-0.004597		3.51333	-0.0051425
3.51667	0.0025225		3.51667	-0.0045995		3.51667	-0.0053255
3.52	0.002104		3.52	-0.004574		3.52	-0.0054845
3.52333	0.0017235		3.52333	-0.004537		3.52333	-0.005625
3.52667	0.001385		3.52667	-0.004494		3.52667	-0.0057405
3.53	0.0010715		3.53	-0.004432		3.53	-0.005836
3.53333	0.0007805		3.53333	-0.004357		3.53333	-0.0059215
3.53667	0.000521		3.53667	-0.0042745		3.53667	-0.005983
3.54	0.0002965		3.54	-0.0041995		3.54	-0.006028
3.54333	8.4e-05		3.54333	-0.004126		3.54333	-0.0060625
3.54667	-0.0001035		3.54667	-0.0040455		3.54667	-0.0060845
3.55	-0.0002635		3.55	-0.003939		3.55	-0.006088
3.55333	-0.000399		3.55333	-0.00383		3.55333	-0.0060765
3.55667	-0.000512		3.55667	-0.0037395		3.55667	-0.006046
3.56	-0.000615		3.56	-0.0036465		3.56	-0.0059815
3.56333	-0.0006855		3.56333	-0.0035775		3.56333	-0.005912
3.56667	-0.0007455		3.56667	-0.0035195		3.56667	-0.00584
3.57	-0.0007965		3.57	-0.0034555		3.57	-0.0057315
3.57333	-0.0008115		3.57333	-0.0034005		3.57333	-0.005611
3.57667	-0.00082		3.57667	-0.003355		3.57667	-0.005493
3.58	-0.00082		3.58	-0.0033135		3.58	-0.005361
3.58333	-0.000789		3.58333	-0.003278		3.58333	-0.0051835
3.58667	-0.0007365		3.58667	-0.003237		3.58667	-0.004968
3.59	-0.000664		3.59	-0.003191		3.59	-0.0047385
3.59333	-0.0005485		3.59333	-0.0031385		3.59333	-0.004474
3.59667	-0.000394		3.59667	-0.0030595		3.59667	-0.0041845
3.6	-0.0002015		3.6	-0.0029665		3.6	-0.0038785
3.60333	3e-05		3.60333	-0.0028425		3.60333	-0.00352
3.60667	0.000291		3.60667	-0.0026695		3.60667	-0.003117
3.61	0.0005855		3.61	-0.0024935		3.61	-0.0027005
3.61333	0.0009285		3.61333	-0.0022945		3.61333	-0.002275
3.61667	0.0013065		3.61667	-0.0020445		3.61667	-0.0018415
3.62	0.001696		3.62	-0.001768		3.62	-0.0013965
3.62333	0.0020965		3.62333	-0.0014665		3.62333	-0.000934
3.62667	0.0025075		3.62667	-0.00114		3.62667	-0.0004615
3.63	0.0029285		3.63	-0.000804		3.63	1.65e-05
3.63333	0.003359		3.63333	-0.00047		3.63333	0.000499
3.63667	0.003788		3.63667	-0.000146		3.63667	0.0009575
3.64	0.0042175		3.64	0.000187		3.64	0.0013925
3.64333	0.0046275		3.64333	0.0005245		3.64333	0.0018125
3.64667	0.005013		3.64667	0.0008325		3.64667	0.002219
3.65	0.0053725		3.65	0.0011205		3.65	0.0025925
3.65333	0.0057075		3.65333	0.0013885		3.65333	0.002927
3.65667	0.006021		3.65667	0.0016355		3.65667	0.0032255
3.66	0.0063075		3.66	0.0018665		3.66	0.003498
3.66333	0.0065805		3.66333	0.0020725		3.66333	0.003753
3.66667	0.006826		3.66667	0.0022475		3.66667	0.003979
3.67	0.0070245		3.67	0.0023845		3.67	0.004178
3.67333	0.0072015		3.67333	0.002501		3.67333	0.004346
3.67667	0.007363		3.67667	0.0025955		3.67667	0.0044825
3.68	0.0074995		3.68	0.0026655		3.68	0.0046015
3.68333	0.0076275		3.68333	0.0027135		3.68333	0.004692
3.68667	0.0077415		3.68667	0.0027335		3.68667	0.004768
3.69	0.0078295		3.69	0.0027365		3.69	0.0048335
3.69333	0.0078975		3.69333	0.002718		3.69333	0.004873
3.69667	0.0079595		3.69667	0.002683		3.69667	0.0049085
3.7	0.0080095		3.7	0.002627		3.7	0.00492
3.70333	0.0080545		3.70333	0.002546		3.70333	0.004901
3.70667	0.0080935		3.70667	0.002466		3.70667	0.0048745
3.71	0.008121		3.71	0.0023605		3.71	0.0048425
3.71333	0.0081565		3.71333	0.002209		3.71333	0.0048015
3.71667	0.008205		3.71667	0.0020485		3.71667	0.004756
3.72	0.008243		3.72	0.0018845		3.72	0.0046995
3.72333	0.0082725		3.72333	0.0017045		3.72333	0.004642
3.72667	0.008321		3.72667	0.001509		3.72667	0.004582
3.73	0.00838		3.73	0.001304		3.73	0.0045045
3.73333	0.0084625		3.73333	0.0010835		3.73333	0.0044235
3.73667	0.008583		3.73667	0.000849		3.73667	0.0043505
3.74	0.008728		3.74	0.000607		3.74	0.0042775
3.74333	0.008923		3.74333	0.0003575		3.74333	0.00418
3.74667	0.009188		3.74667	0.0001035		3.74667	0.0040685
3.75	0.009524		3.75	-0.00015		3.75	0.0039695
3.75333	0.009972		3.75333	-0.000393		3.75333	0.0038745
3.75667	0.0105885		3.75667	-0.0006225		3.75667	0.00375
3.76	0.0114285		3.76	-0.000853		3.76	0.0036225
3.76333	0.0125775		3.76333	-0.0010715		3.76333	0.003512
3.76667	0.0141605		3.76667	-0.00126		3.76667	0.003375
3.77	0.016373		3.77	-0.001426		3.77	0.0032255
3.77333	0.019506		3.77333	-0.001559		3.77333	0.00307
3.77667	0.023846		3.77667	-0.001685		3.77667	0.002883
3.78	0.0297025		3.78	-0.001814		3.78	0.002671
3.78333	0.037431		3.78333	-0.0018975		3.78333	0.0024035
3.78667	0.0474035		3.78667	-0.0019425		3.78667	0.002021
3.79	0.0598355		3.79	-0.001974		3.79	0.00148
3.79333	0.0740655		3.79333	-0.0019815		3.79333	0.000703
3.79667	0.088167		3.79667	-0.001968		3.79667	-0.000359
3.8	0.099665		3.8	-0.0019455		3.8	-0.001682
3.80333	0.106768		3.80333	-0.001906		3.80333	-0.0031745
3.80667	0.108969		3.80667	-0.0018545		3.80667	-0.0046685
3.81	0.106835		3.81	-0.001796		3.81	-0.0060185
3.81333	0.101517		3.81333	-0.0017185		3.81333	-0.0070915
3.81667	0.094216		3.81667	-0.0016385		3.81667	-0.007787
3.82	0.085921		3.82	-0.001565		3.82	-0.008149
3.82333	0.0774065		3.82333	-0.001489		3.82333	-0.0082265
3.82667	0.0692265		3.82667	-0.001402		3.82667	-0.0080495
3.83	0.0617435		3.83	-0.001309		3.83	-0.007725
3.83333	0.055191		3.83333	-0.001221		3.83333	-0.007299
3.83667	0.04965		3.83667	-0.001135		3.83667	-0.006788
3.84	0.045102		3.84	-0.0010605		3.84	-0.0062475
3.84333	0.041517		3.84333	-0.0009835		3.84333	-0.005694
3.84667	0.03883		3.84667	-0.000911		3.84667	-0.0051475
3.85	0.036936		3.85	-0.000853		3.85	-0.0046205
3.85333	0.035712		3.85333	-0.0007765		3.85333	-0.0041035
3.85667	0.0350265		3.85667	-0.000705		3.85667	-0.003622
3.86	0.034794		3.86	-0.00065		3.86	-0.003188
3.86333	0.0349365		3.86333	-0.000598		3.86333	-0.0028005
3.86667	0.035336		3.86667	-0.000554		3.86667	-0.002464
3.87	0.035894		3.87	-0.000506		3.87	-0.00216
3.87333	0.036518		3.87333	-0.000459		3.87333	-0.001892
3.87667	0.0371195		3.87667	-0.0004185		3.87667	-0.001661
3.88	0.037619		3.88	-0.000377		3.88	-0.0014415
3.88333	0.0379405		3.88333	-0.000337		3.88333	-0.001251
3.88667	0.038035		3.88667	-0.000301		3.88667	-0.0010925
3.89	0.037853		3.89	-0.00027		3.89	-0.000951
3.89333	0.0373775		3.89333	-0.0002415		3.89333	-0.0008235
3.89667	0.0366415		3.89667	-0.000214		3.89667	-0.000718
3.9	0.0356815		3.9	-0.0001925		3.9	-0.0006335
3.90333	0.0345145		3.90333	-0.0001695		3.90333	-0.0005495
3.90667	0.0331955		3.90667	-0.00015		3.90667	-0.000473
3.91	0.031781		3.91	-0.000142		3.91	-0.0004075
3.91333	0.030306		3.91333	-0.000131		3.91333	-0.000348
3.91667	0.028827		3.91667	-0.000108		3.91667	-0.000293
3.92	0.027404		3.92	-9.15e-05		3.92	-0.000243
3.92333	0.026056		3.92333	-8.25e-05		3.92333	-0.0001925
3.92667	0.024782		3.92667	-7.15e-05		3.92667	-0.0001485
3.93	0.0236095		3.93	-6.55e-05		3.93	-0.000108
3.93333	0.0225315		3.93333	-6.05e-05		3.93333	-6.35e-05
3.93667	0.021555		3.93667	-4.4e-05		3.93667	-2.5e-05
3.94	0.0206825		3.94	-3.35e-05		3.94	-1.5e-06
3.94333	0.019898		3.94333	-4e-05		3.94333	3e-05
3.94667	0.0191785		3.94667	-4.5e-05		3.94667	5.35e-05
3.95	0.018523		3.95	-3.9e-05		3.95	6.55e-05
3.95333	0.017941		3.95333	-3.05e-05		3.95333	9.4e-05
3.95667	0.017405		3.95667	-3.1e-05		3.95667	0.0001225
3.96	0.016905		3.96	-2.6e-05		3.96	0.000132
3.96333	0.0164355		3.96333	-1e-05		3.96333	0.0001385
3.96667	0.015985		3.96667	-4.5e-06		3.96667	0.000149
3.97	0.015559		3.97	0		3.97	0.000159
3.97333	0.015135		3.97333	-2.5e-06		3.97333	0.000168
3.97667	0.0147175		3.97667	-1.75e-05		3.97667	0.0001735
3.98	0.014316		3.98	-2.6e-05		3.98	0.00018
3.98333	0.013916		3.98333	-2.35e-05		3.98333	0.00017
3.98667	0.013507		3.98667	-1.6e-05		3.98667	0.0001615
3.99	0.013101		3.99	-1.4e-05		3.99	0.000169
3.99333	0.012715		3.99333	-1.7e-05		3.99333	0.000169
3.99667	0.012323		3.99667	-1.55e-05		3.99667	0.0001815
4	0.0119305		4	-2e-06		4	0.0001835
4.00333	0.0115375		4.00333	5.5e-06		4.00333	0.000167
4.00667	0.0111545		4.00667	1e-06		4.00667	0.0001625
4.01	0.0107795		4.01	-1e-06		4.01	0.0001635
4.01333	0.010405		4.01333	6e-06		4.01333	0.0001655
4.01667	0.0100395		4.01667	1e-05		4.01667	0.0001625
4.02	0.0096855		4.02	1.05e-05		4.02	0.000149
4.02333	0.009363		4.02333	1.4e-05		4.02333	0.0001435
4.02667	0.009047		4.02667	6.5e-06		4.02667	0.0001545
4.03	0.008744		4.03	4e-06		4.03	0.0001535
4.03333	0.008463		4.03333	1.9e-05		4.03333	0.0001575
4.03667	0.0081835		4.03667	2.15e-05		4.03667	0.0001625
4.04	0.00793		4.04	1e-05		4.04	0.0001465
4.04333	0.0077005		4.04333	1.35e-05		4.04333	0.0001405
4.04667	0.00748		4.04667	2.35e-05		4.04667	0.000152
4.05	0.007279		4.05	2.55e-05		4.05	0.000151
4.05333	0.007094		4.05333	2.15e-05		4.05333	0.000142
4.05667	0.006922		4.05667	1.25e-05		4.05667	0.000143
4.06	0.0067685		4.06	1e-05		4.06	0.0001485
4.06333	0.0066215		4.06333	1.35e-05		4.06333	0.0001485
4.06667	0.006476		4.06667	1.25e-05		4.06667	0.0001365
4.07	0.0063335		4.07	9.5e-06		4.07	0.0001285
4.07333	0.006191		4.07333	5.5e-06		4.07333	0.0001385
4.07667	0.006052		4.07667	4e-06		4.07667	0.000152
4.08	0.0059215		4.08	1.5e-05		4.08	0.0001445
4.08333	0.005795		4.08333	2.05e-05		4.08333	0.000129
4.08667	0.005661		4.08667	1.75e-05		4.08667	0.000144
4.09	0.005534		4.09	2.55e-05		4.09	0.0001575
4.09333	0.0054045		4.09333	2.65e-05		4.09333	0.000152
4.09667	0.0052595		4.09667	1.45e-05		4.09667	0.0001645
4.1	0.0051385		4.1	1e-05		4.1	0.0001855
4.10333	0.0050195		4.10333	1.45e-05		4.10333	0.000182
4.10667	0.0048845		4.10667	1.6e-05		4.10667	0.0001685
4.11	0.004761		4.11	9.5e-06		4.11	0.000176
4.11333	0.004649		4.11333	1.55e-05		4.11333	0.000189
4.11667	0.0045425		4.11667	2.5e-05		4.11667	0.0001845
4.12	0.0044345		4.12	1.9e-05		4.12	0.000173
4.12333	0.004321		4.12333	1.1e-05		4.12333	0.00016
4.12667	0.004212		4.12667	3e-06		4.12667	0.0001515
4.13	0.004118		4.13	1e-06		4.13	0.0001535
4.13333	0.0040275		4.13333	3.5e-06		4.13333	0.000162
4.13667	0.0039405		4.13667	5e-07		4.13667	0.000159
4.14	0.003847		4.14	1.5e-06		4.14	0.000154
4.14333	0.0037555		4.14333	6.5e-06		4.14333	0.000158
4.14667	0.0036675		4.14667	-5e-07		4.14667	0.000158
4.15	0.0035775		4.15	-1e-05		4.15	0.0001625
4.15333	0.0035055		4.15333	-5.5e-06		4.15333	0.0001635
4.15667	0.0034415		4.15667	1e-06		4.15667	0.000154
4.16	0.0033715		4.16	7.5e-06		4.16	0.0001435
4.16333	0.003304		4.16333	6e-06		4.16333	0.0001425
4.16667	0.003238		4.16667	1.5e-06		4.16667	0.0001555
4.17	0.00317		4.17	3e-06		4.17	0.0001515
4.17333	0.003114		4.17333	-1.5e-06		4.17333	0.000148
4.17667	0.003065		4.17667	-1.3e-05		4.17667	0.000149
4.18	0.0030305		4.18	-1.15e-05		4.18	0.000143
4.18333	0.002986		4.18333	-5e-07		4.18333	0.0001515
4.18667	0.0029295		4.18667	-1e-06		4.18667	0.000158
4.19	0.002888		4.19	-5e-07		4.19	0.0001645
4.19333	0.0028585		4.19333	6.5e-06		4.19333	0.00016
4.19667	0.0028385		4.19667	5e-06		4.19667	0.000142
4.2	0.002803		4.2	6e-06		4.2	0.000148
4.20333	0.0027665		4.20333	9.5e-06		4.20333	0.000163
4.20667	0.002749		4.20667	6e-06		4.20667	0.000158
4.21	0.0027245		4.21	1.2e-05		4.21	0.0001595
4.21333	0.0026995		4.21333	1.8e-05		4.21333	0.000163
4.21667	0.0026855		4.21667	8.5e-06		4.21667	0.0001625
4.22	0.00267		4.22	8.5e-06		4.22	0.0001625
4.22333	0.002655		4.22333	2e-05		4.22333	0.0001725
4.22667	0.002642		4.22667	1.3e-05		4.22667	0.000178
4.23	0.002615		4.23	8.5e-06		4.23	0.0001725
4.23333	0.002597		4.23333	1.95e-05		4.23333	0.0001735
4.23667	0.0025975		4.23667	2.65e-05		4.23667	0.0001695
4.24	0.0025835		4.24	2.45e-05		4.24	0.0001685
4.24333	0.002563		4.24333	2.2e-05		4.24333	0.0001785
4.24667	0.0025425		4.24667	2.1e-05		4.24667	0.000194
4.25	0.002529		4.25	2.05e-05		4.25	0.0001965
4.25333	0.002513		4.25333	1.9e-05		4.25333	0.0001955
4.25667	0.0024835		4.25667	1.8e-05		4.25667	0.000193
4.26	0.002459		4.26	2.35e-05		4.26	0.0001915
4.26333	0.0024365		4.26333	3.1e-05		4.26333	0.0001915
4.26667	0.002415		4.26667	3.1e-05		4.26667	0.0001865
4.27	0.002397		4.27	2.05e-05		4.27	0.000195
4.27333	0.002378		4.27333	3.05e-05		4.27333	0.0002095
4.27667	0.0023445		4.27667	4.5e-05		4.27667	0.000205
4.28	0.0023205		4.28	3.4e-05		4.28	0.000193
4.28333	0.0023045		4.28333	2.35e-05		4.28333	0.0001965
4.28667	0.002265		4.28667	2e-05		4.28667	0.0001945
4.29	0.0022415		4.29	8.5e-06		4.29	0.000186
4.29333	0.002225		4.29333	1.05e-05		4.29333	0.0001845
4.29667	0.0021895		4.29667	1.5e-05		4.29667	0.000181
4.3	0.0021705		4.3	1.4e-05		4.3	0.0001765
4.30333	0.0021555		4.30333	2.95e-05		4.30333	0.000187
4.30667	0.002132		4.30667	3.8e-05		4.30667	0.000195
4.31	0.002112		4.31	2.75e-05		4.31	0.0001825
4.31333	0.0020985		4.31333	1.65e-05		4.31333	0.000179
4.31667	0.002088		4.31667	1.65e-05		4.31667	0.0001775
4.32	0.0020775		4.32	2e-05		4.32	0.0001565
4.32333	0.00206		4.32333	2.3e-05		4.32333	0.0001575
4.32667	0.0020415		4.32667	1.2e-05		4.32667	0.0001755
4.33	0.0020215		4.33	3e-06		4.33	0.000172
4.33333	0.002008		4.33333	1.45e-05		4.33333	0.000161
4.33667	0.0020025		4.33667	2.05e-05		4.33667	0.000158
4.34	0.00199		4.34	1.65e-05		4.34	0.0001655
4.34333	0.001975		4.34333	1.7e-05		4.34333	0.0001735
4.34667	0.0019615		4.34667	2.25e-05		4.34667	0.0001725
4.35	0.0019485		4.35	1.75e-05		4.35	0.000168
4.35333	0.001936		4.35333	6e-06		4.35333	0.000168
4.35667	0.001935		4.35667	4.5e-06		4.35667	0.0001685
4.36	0.001931		4.36	5e-06		4.36	0.000166
4.36333	0.001924		4.36333	-2e-06		4.36333	0.0001635
4.36667	0.001914		4.36667	2e-06		4.36667	0.0001595
4.37	0.0018955		4.37	1.6e-05		4.37	0.0001635
4.37333	0.0018895		4.37333	9e-06		4.37333	0.000168
4.37667	0.0018835		4.37667	4.5e-06		4.37667	0.0001655
4.38	0.001865		4.38	1.65e-05		4.38	0.000176
4.38333	0.0018415		4.38333	1.9e-05		4.38333	0.0001735
4.38667	0.0018275		4.38667	8e-06		4.38667	0.000155
4.39	0.001819		4.39	3.5e-06		4.39	0.00015
4.39333	0.0018		4.39333	5.5e-06		4.39333	0.000153
4.39667	0.0017855		4.39667	1.2e-05		4.39667	0.000162
4.4	0.001781		4.4	1.55e-05		4.4	0.0001655
4.40333	0.0017715		4.40333	-1.5e-06		4.40333	0.0001615
4.40667	0.001748		4.40667	4.5e-06		4.40667	0.000157
4.41	0.0017385		4.41	1.95e-05		4.41	0.0001505
4.41333	0.001727		4.41333	1.65e-05		4.41333	0.000151
4.41667	0.001687		4.41667	4e-06		4.41667	0.0001615
4.42	0.001664		4.42	4e-06		4.42	0.0001665
4.42333	0.001662		4.42333	7.5e-06		4.42333	0.0001665
4.42667	0.0016575		4.42667	7.5e-06		4.42667	0.0001715
4.43	0.00164		4.43	2.2e-05		4.43	0.00017
4.43333	0.001619		4.43333	2.2e-05		4.43333	0.0001665
4.43667	0.001609		4.43667	1.1e-05		4.43667	0.000171
4.44	0.0015945		4.44	1.2e-05		4.44	0.0001715
4.44333	0.001575		4.44333	1e-05		4.44333	0.0001785
4.44667	0.0015575		4.44667	9e-06		4.44667	0.000188
4.45	0.0015635		4.45	1.45e-05		4.45	0.0001725
4.45333	0.0015615		4.45333	6e-06		4.45333	0.000158
4.45667	0.001541		4.45667	-2e-06		4.45667	0.000173
4.46	0.0015245		4.46	1.5e-06		4.46	0.000181
4.46333	0.001505		4.46333	6e-06		4.46333	0.000173
4.46667	0.0014905		4.46667	6e-06		4.46667	0.0001675
4.47	0.001485		4.47	1.2e-05		4.47	0.00016
4.47333	0.0014715		4.47333	1.45e-05		4.47333	0.000158
4.47667	0.0014475		4.47667	1.85e-05		4.47667	0.0001695
4.48	0.00144		4.48	2.35e-05		4.48	0.0001785
4.48333	0.001442		4.48333	1.7e-05		4.48333	0.000183
4.48667	0.0014355		4.48667	1.05e-05		4.48667	0.0001885
4.49	0.0014155		4.49	1.65e-05		4.49	0.000193
4.49333	0.0013995		4.49333	2.55e-05		4.49333	0.0001885
4.49667	0.0013855		4.49667	2.05e-05		4.49667	0.00017
4.5	0.001368		4.5	1.3e-05		4.5	0.0001645
4.50333	0.001364		4.50333	8.5e-06		4.50333	0.0001725
4.50667	0.0013625		4.50667	5e-06		4.50667	0.0001695
4.51	0.0013535		4.51	1.05e-05		4.51	0.000167
4.51333	0.001329		4.51333	9.5e-06		4.51333	0.0001685
4.51667	0.0013045		4.51667	0		4.51667	0.0001605
4.52	0.001304		4.52	5e-07		4.52	0.000146
4.52333	0.001301		4.52333	5e-06		4.52333	0.0001435
4.52667	0.0012855		4.52667	1.1e-05		4.52667	0.000148
4.53	0.00127		4.53	1.05e-05		4.53	0.000153
4.53333	0.0012595		4.53333	8.5e-06		4.53333	0.0001625
4.53667	0.001253		4.53667	7e-06		4.53667	0.000168
4.54	0.0012455		4.54	3e-06		4.54	0.000172
4.54333	0.001229		4.54333	2.5e-06		4.54333	0.000171
4.54667	0.0012065		4.54667	3e-06		4.54667	0.000168
4.55	0.001202		4.55	-7.5e-06		4.55	0.000174
4.55333	0.0011985		4.55333	-1.8e-05		4.55333	0.0001755
4.55667	0.0011875		4.55667	-1.35e-05		4.55667	0.000162
4.56	0.0011885		4.56	-1e-05		4.56	0.0001595
4.56333	0.0011775		4.56333	-1.15e-05		4.56333	0.0001675
4.56667	0.001164		4.56667	-7e-06		4.56667	0.0001675
4.57	0.001158		4.57	-4.5e-06		4.57	0.0001685
4.57333	0.001152		4.57333	-9.5e-06		4.57333	0.000171
4.57667	0.001148		4.57667	-3e-06		4.57667	0.000171
4.58	0.001143		4.58	-6e-06		4.58	0.000172
4.58333	0.0011365		4.58333	-1.85e-05		4.58333	0.0001735
4.58667	0.0011245		4.58667	-1.35e-05		4.58667	0.000176
4.59	0.001122		4.59	-1e-05		4.59	0.0001675
4.59333	0.0011265		4.59333	-7.5e-06		4.59333	0.000163
4.59667	0.001121		4.59667	0		4.59667	0.000166
4.6	0.001119		4.6	6e-06		4.6	0.000165
4.60333	0.0011275		4.60333	-3.5e-06		4.60333	0.000165
4.60667	0.001125		4.60667	-1.15e-05		4.60667	0.000163
4.61	0.001118		4.61	-1.05e-05		4.61	0.000159
4.61333	0.0011025		4.61333	-1.35e-05		4.61333	0.00016
4.61667	0.001089		4.61667	-8.5e-06		4.61667	0.00017
4.62	0.001095		4.62	-7.5e-06		4.62	0.0001705
4.62333	0.0011115		4.62333	-1.75e-05		4.62333	0.0001625
4.62667	0.0011135		4.62667	-2.25e-05		4.62667	0.000164
4.63	0.001107		4.63	-6e-06		4.63	0.000169
4.63333	0.00111		4.63333	4.5e-06		4.63333	0.0001745
4.63667	0.0011135		4.63667	-1.5e-06		4.63667	0.0001895
4.64	0.0011005		4.64	-2.5e-06		4.64	0.000194
4.64333	0.001086		4.64333	-3e-06		4.64333	0.0001845
4.64667	0.001093		4.64667	-8.5e-06		4.64667	0.000171
4.65	0.001099		4.65	-1.8e-05		4.65	0.0001645
4.65333	0.0011005		4.65333	-1.25e-05		4.65333	0.000177
4.65667	0.0010905		4.65667	-1e-06		4.65667	0.000188
4.66	0.0010765		4.66	-2.5e-06		4.66	0.0001875
4.66333	0.001073		4.66333	4e-06		4.66333	0.000173
4.66667	0.0010655		4.66667	1.05e-05		4.66667	0.0001665
4.67	0.001057		4.67	5.5e-06		4.67	0.0001765
4.67333	0.0010575		4.67333	-7e-06		4.67333	0.0001745
4.67667	0.001054		4.67667	-1e-05		4.67667	0.0001775
4.68	0.001048		4.68	-6.5e-06		4.68	0.000179
4.68333	0.001038		4.68333	-1.5e-06		4.68333	0.0001675
4.68667	0.0010205		4.68667	6e-06		4.68667	0.0001715
4.69	0.0010145		4.69	5.5e-06		4.69	0.000182
4.69333	0.001014		4.69333	9e-06		4.69333	0.0001715
4.69667	0.001011		4.69667	8.5e-06		4.69667	0.000167
4.7	0.0010065		4.7	-3.5e-06		4.7	0.0001685
4.70333	0.0010075		4.70333	-5e-07		4.70333	0.0001675
4.70667	0.001006		4.70667	3e-06		4.70667	0.000169
4.71	0.001		4.71	5e-07		4.71	0.0001675
4.71333	0.0009895		4.71333	0		4.71333	0.0001765
4.71667	0.000985		4.71667	-4e-06		4.71667	0.000175
4.72	0.000982		4.72	5e-07		4.72	0.0001755
4.72333	0.0009695		4.72333	2e-06		4.72333	0.000189
4.72667	0.0009685		4.72667	-1e-06		4.72667	0.000176
4.73	0.0009645		4.73	4e-06		4.73	0.000169
4.73333	0.000968		4.73333	-5e-07		4.73333	0.0001795
4.73667	0.0009855		4.73667	-2.5e-06		4.73667	0.0001725
4.74	0.00098		4.74	0		4.74	0.0001775
4.74333	0.0009625		4.74333	5e-07		4.74333	0.000187
4.74667	0.0009565		4.74667	-6e-06		4.74667	0.000174
4.75	0.0009515		4.75	-6e-06		4.75	0.000179
4.75333	0.0009485		4.75333	-1.5e-06		4.75333	0.0001895
4.75667	0.000949		4.75667	-7e-06		4.75667	0.0001835
4.76	0.0009495		4.76	-2.5e-06		4.76	0.000178
4.76333	0.000951		4.76333	-9.5e-06		4.76333	0.0001785
4.76667	0.000954		4.76667	-7.5e-06		4.76667	0.000179
4.77	0.0009535		4.77	1.6e-05		4.77	0.0001765
4.77333	0.0009425		4.77333	1.35e-05		4.77333	0.0001755
4.77667	0.000931		4.77667	-1.5e-06		4.77667	0.000184
4.78	0.0009255		4.78	-4.5e-06		4.78	0.0001855
4.78333	0.000926		4.78333	-4.5e-06		4.78333	0.0001815
4.78667	0.0009275		4.78667	-1e-06		4.78667	0.0001845
4.79	0.0009295		4.79	-6.5e-06		4.79	0.000193
4.79333	0.0009415		4.79333	-1.35e-05		4.79333	0.0001955
4.79667	0.0009385		4.79667	-1.05e-05		4.79667	0.000182
4.8	0.000931		4.8	-3e-06		4.8	0.0001685
4.80333	0.00094		4.80333	2.5e-06		4.80333	0.000168
4.80667	0.0009445		4.80667	4.5e-06		4.80667	0.0001745
4.81	0.0009365		4.81	5e-06		4.81	0.0001795
4.81333	0.000934		4.81333	8e-06		4.81333	0.0001855
4.81667	0.000937		4.81667	1.25e-05		4.81667	0.000192
4.82	0.0009295		4.82	9e-06		4.82	0.0001915
4.82333	0.0009265		4.82333	1.2e-05		4.82333	0.00018
4.82667	0.000918		4.82667	2.5e-06		4.82667	0.0001745
4.83	0.0009225		4.83	-6.5e-06		4.83	0.0001825
4.83333	0.0009315		4.83333	-2.5e-06		4.83333	0.0001865
4.83667	0.0009285		4.83667	-4e-06		4.83667	0.000188
4.84	0.0009285		4.84	-5.5e-06		4.84	0.000187
4.84333	0.0009275		4.84333	-1.5e-06		4.84333	0.0001815
4.84667	0.00092		4.84667	1.5e-06		4.84667	0.000181
4.85	0.000907		4.85	-3.5e-06		4.85	0.0001905
4.85333	0.000911		4.85333	-8e-06		4.85333	0.0001935
4.85667	0.000909		4.85667	-1.65e-05		4.85667	0.000178
4.86	0.0009015		4.86	-2.3e-05		4.86	0.0001755
4.86333	0.0009005		4.86333	-1.3e-05		4.86333	0.0001865
4.86667	0.000901		4.86667	-9.5e-06		4.86667	0.000193
4.87	0.0009015		4.87	-1.5e-05		4.87	0.000196
4.87333	0.0008895		4.87333	-1.75e-05		4.87333	0.000194
4.87667	0.0008865		4.87667	-1.7e-05		4.87667	0.000195
4.88	0.000894		4.88	-9.5e-06		4.88	0.0001925
4.88333	0.0008955		4.88333	3e-06		4.88333	0.0001785
4.88667	0.0008945		4.88667	2e-06		4.88667	0.0001765
4.89	0.0008895		4.89	-4.5e-06		4.89	0.000185
4.89333	0.0008935		4.89333	-5e-06		4.89333	0.00019
4.89667	0.000904		4.89667	-8e-06		4.89667	0.0001805
4.9	0.0009		4.9	1.5e-06		4.9	0.0001675
4.90333	0.0008915		4.90333	-3e-06		4.90333	0.0001655
4.90667	0.0008795		4.90667	-1.6e-05		4.90667	0.000167
4.91	0.0008815		4.91	-1.4e-05		4.91	0.0001705
4.91333	0.0008845		4.91333	-5.5e-06		4.91333	0.000179
4.91667	0.00088		4.91667	3.5e-06		4.91667	0.000182
4.92	0.000877		4.92	-5e-07		4.92	0.000179
4.92333	0.0008785		4.92333	5e-07		4.92333	0.0001785
4.92667	0.0008825		4.92667	9e-06		4.92667	0.000183
4.93	0.0008755		4.93	-5.5e-06		4.93	0.0001895
4.93333	0.00088		4.93333	-2.2e-05		4.93333	0.0001825
4.93667	0.000887		4.93667	-1.35e-05		4.93667	0.000185
4.94	0.0008875		4.94	-9.5e-06		4.94	0.000183
4.94333	0.0008915		4.94333	-1.05e-05		4.94333	0.0001715
4.94667	0.0008805		4.94667	-9e-06		4.94667	0.000181
4.95	0.0008785		4.95	-9.5e-06		4.95	0.000195
4.95333	0.000886		4.95333	-1.15e-05		4.95333	0.0001815
4.95667	0.0008825		4.95667	-9e-06		4.95667	0.0001755
4.96	0.0008785		4.96	-1.5e-06		4.96	0.000188
4.96333	0.000885		4.96333	-1e-06		4.96333	0.000184
4.96667	0.0008945		4.96667	-4.5e-06		4.96667	0.000181
4.97	0.0008895		4.97	-4.5e-06		4.97	0.0001815
4.97333	0.0008865		4.97333	-4.5e-06		4.97333	0.00018
4.97667	0.000894		4.97667	-1e-05		4.97667	0.0001745
4.98	0.000903		4.98	-1.5e-05		4.98	0.0001815
4.98333	0.0009005		4.98333	-8.5e-06		4.98333	0.0001865
4.98667	0.0008965		4.98667	-3e-06		4.98667	0.000196
4.99	0.0008945		4.99	2.5e-06		4.99	0.000198
4.99333	0.000899		4.99333	4e-06		4.99333	0.0001865
4.99667	0.000909		4.99667	-1.3e-05		4.99667	0.0001845
5	0.000915		5	-1.85e-05		5	0.000176
5.00333	0.0009105		5.00333	-9.5e-06		5.00333	0.0001765
5.00667	0.0009015		5.00667	-6e-06		5.00667	0.0001875
5.01	0.000894		5.01	-1.05e-05		5.01	0.00019
5.01333	0.0008975		5.01333	-3e-06		5.01333	0.00018
5.01667	0.0009025		5.01667	9e-06		5.01667	0.0001755
5.02	0.0008895		5.02	-3e-06		5.02	0.000185
5.02333	0.0008875		5.02333	-1.05e-05		5.02333	0.0001895
5.02667	0.000895		5.02667	-1.05e-05		5.02667	0.0001935
5.03	0.0008945		5.03	-7e-06		5.03	0.000204
5.03333	0.0008795		5.03333	-2e-06		5.03333	0.000205
5.03667	0.0008615		5.03667	-9e-06		5.03667	0.0001925
5.04	0.000866		5.04	-6e-06		5.04	0.000181
5.04333	0.000868		5.04333	2e-06		5.04333	0.000181
5.04667	0.000855		5.04667	2e-06		5.04667	0.000195
5.05	0.0008385		5.05	0		5.05	0.000198
5.05333	0.000834		5.05333	-6e-06		5.05333	0.000193
5.05667	0.000831		5.05667	-1.05e-05		5.05667	0.0002015
5.06	0.000816		5.06	-1.1e-05		5.06	0.000202
5.06333	0.000813		5.06333	-1.45e-05		5.06333	0.000192
5.06667	0.0008165		5.06667	-2.4e-05		5.06667	0.000194
5.07	0.0008185		5.07	-2.05e-05		5.07	0.000196
5.07333	0.0008235		5.07333	-2.5e-06		5.07333	0.0001905
5.07667	0.0008095		5.07667	8e-06		5.07667	0.000198
5.08	0.0007925		5.08	-2e-06		5.08	0.0001985
5.08333	0.000802		5.08333	-1.65e-05		5.08333	0.0001895
5.08667	0.0008075		5.08667	-1.95e-05		5.08667	0.000187
5.09	0.000792		5.09	-2e-05		5.09	0.0001865
5.09333	0.0007845		5.09333	-1.35e-05		5.09333	0.0001815
5.09667	0.0007845		5.09667	-1e-05		5.09667	0.0001785
5.1	0.000791		5.1	-9e-06		5.1	0.0001815
5.10333	0.0007915		5.10333	-7.5e-06		5.10333	0.000182
5.10667	0.00078		5.10667	-9e-06		5.10667	0.000184
5.11	0.0007755		5.11	1e-06		5.11	0.0001865
5.11333	0.000779		5.11333	4.5e-06		5.11333	0.0001855
5.11667	0.000776		5.11667	-3e-06		5.11667	0.0001855
5.12	0.0007655		5.12	-3.5e-06		5.12	0.000181
5.12333	0.0007745		5.12333	1e-06		5.12333	0.0001785
5.12667	0.0007685		5.12667	3.5e-06		5.12667	0.0001875
5.13	0.000754		5.13	-2e-06		5.13	0.0001875
5.13333	0.0007595		5.13333	-7e-06		5.13333	0.0001885
5.13667	0.000769		5.13667	-2e-06		5.13667	0.000192
5.14	0.000775		5.14	-2.5e-06		5.14	0.000186
5.14333	0.0007765		5.14333	-9.5e-06		5.14333	0.000187
5.14667	0.000766		5.14667	-1.45e-05		5.14667	0.0001985
5.15	0.0007545		5.15	-6.5e-06		5.15	0.0001915
5.15333	0.000756		5.15333	6.5e-06		5.15333	0.00018
5.15667	0.0007595		5.15667	5e-07		5.15667	0.000188
5.16	0.0007605		5.16	-6.5e-06		5.16	0.000191
5.16333	0.0007615		5.16333	-1.5e-06		5.16333	0.0001895
5.16667	0.000766		5.16667	-8e-06		5.16667	0.000186
5.17	0.000769		5.17	-1.45e-05		5.17	0.0001825
5.17333	0.000771		5.17333	-1.05e-05		5.17333	0.000196
5.17667	0.0007615		5.17667	-7e-06		5.17667	0.0002115
5.18	0.0007535		5.18	-1.6e-05		5.18	0.000197
5.18333	0.0007525		5.18333	-1.85e-05		5.18333	0.0001815
5.18667	0.0007515		5.18667	6e-06		5.18667	0.00019
5.19	0.000755		5.19	2.25e-05		5.19	0.000191
5.19333	0.000751		5.19333	7.5e-06		5.19333	0.000193
5.19667	0.000739		5.19667	-5.5e-06		5.19667	0.0001875
5.2	0.0007415		5.2	-3e-06		5.2	0.000181
5.20333	0.0007365		5.20333	-5e-06		5.20333	0.0001875
5.20667	0.000734		5.20667	0		5.20667	0.0001875
5.21	0.0007385		5.21	-7e-06		5.21	0.0001915
5.21333	0.0007325		5.21333	-9.5e-06		5.21333	0.000199
5.21667	0.0007365		5.21667	-1.5e-06		5.21667	0.0001945
5.22	0.000729		5.22	-4.5e-06		5.22	0.0001915
5.22333	0.0007135		5.22333	-6e-06		5.22333	0.0001985
5.22667	0.0007155		5.22667	-1.65e-05		5.22667	0.000196
5.23	0.000716		5.23	-1.85e-05		5.23	0.0001955
5.23333	0.0007015		5.23333	-9.5e-06		5.23333	0.0001885
5.23667	0.0006965		5.23667	-6e-06		5.23667	0.00018
5.24	0.000698		5.24	-1.5e-06		5.24	0.000191
5.24333	0.000697		5.24333	1.1e-05		5.24333	0.0002015
5.24667	0.0006875		5.24667	1.3e-05		5.24667	0.0002055
5.25	0.0006825		5.25	-2e-06		5.25	0.0002035
5.25333	0.0006795		5.25333	-1.1e-05		5.25333	0.000191
5.25667	0.0006805		5.25667	-1.05e-05		5.25667	0.0001875
5.26	0.0006745		5.26	-1e-06		5.26	0.0002025
5.26333	0.0006645		5.26333	6e-06		5.26333	0.0002005
5.26667	0.0006675		5.26667	2.5e-06		5.26667	0.0001985
5.27	0.000665		5.27	3e-06		5.27	0.000207
5.27333	0.000661		5.27333	1.3e-05		5.27333	0.0002005
5.27667	0.000654		5.27667	1.15e-05		5.27667	0.0001865
5.28	0.0006515		5.28	-1e-06		5.28	0.0001915
5.28333	0.000659		5.28333	-5e-06		5.28333	0.0001945
5.28667	0.0006555		5.28667	-8e-06		5.28667	0.0001845
5.29	0.0006455		5.29	-9.5e-06		5.29	0.000191
5.29333	0.0006465		5.29333	-4.5e-06		5.29333	0.0001925
5.29667	0.0006495		5.29667	6e-06		5.29667	0.000182
5.3	0.0006485		5.3	1.2e-05		5.3	0.00018
5.30333	0.0006485		5.30333	-5e-07		5.30333	0.0001875
5.30667	0.000645		5.30667	-1.05e-05		5.30667	0.0001975
5.31	0.000637		5.31	-1.05e-05		5.31	0.0002015
5.31333	0.0006365		5.31333	-2e-06		5.31333	0.000199
5.31667	0.000644		5.31667	1.15e-05		5.31667	0.000202
5.32	0.0006385		5.32	1.7e-05		5.32	0.0001975
5.32333	0.0006265		5.32333	2.15e-05		5.32333	0.000193
5.32667	0.000626		5.32667	1.75e-05		5.32667	0.0002005
5.33	0.0006355		5.33	2e-06		5.33	0.0002085
5.33333	0.0006395		5.33333	2.5e-06		5.33333	0.000199
5.33667	0.0006285		5.33667	1.5e-06		5.33667	0.000191
5.34	0.0006095		5.34	-1.55e-05		5.34	0.0001925
5.34333	0.000606		5.34333	-1.15e-05		5.34333	0.0001905
5.34667	0.0006225		5.34667	-5e-07		5.34667	0.0001965
5.35	0.0006255		5.35	-5e-07		5.35	0.000196
5.35333	0.000615		5.35333	1.5e-06		5.35333	0.0001935
5.35667	0.0006055		5.35667	-9.5e-06		5.35667	0.0001915
5.36	0.0006045		5.36	-6.5e-06		5.36	0.000194
5.36333	0.000612		5.36333	1.15e-05		5.36333	0.0002
5.36667	0.00062		5.36667	1.35e-05		5.36667	0.0001915
5.37	0.0006155		5.37	4e-06		5.37	0.000193
5.37333	0.000608		5.37333	3.5e-06		5.37333	0.0001925
5.37667	0.0006125		5.37667	4.5e-06		5.37667	0.0001875
5.38	0.000619		5.38	4e-06		5.38	0.00019
5.38333	0.0006165		5.38333	6.5e-06		5.38333	0.0001945
5.38667	0.000607		5.38667	1.5e-06		5.38667	0.000202
5.39	0.0006015		5.39	0		5.39	0.0001995
5.39333	0.00061		5.39333	4.5e-06		5.39333	0.000198
5.39667	0.000622		5.39667	1.05e-05		5.39667	0.0001965
5.4	0.0006145		5.4	1.65e-05		5.4	0.0002
5.40333	0.0006065		5.40333	1.55e-05		5.40333	0.000196
5.40667	0.000607		5.40667	4e-06		5.40667	0.0001865
5.41	0.000613		5.41	1e-06		5.41	0.0001995
5.41333	0.0006025		5.41333	6.5e-06		5.41333	0.000207
5.41667	0.0005905		5.41667	-1e-06		5.41667	0.0001865
5.42	0.0005995		5.42	-5.5e-06		5.42	0.0001845
5.42333	0.0005985		5.42333	-9e-06		5.42333	0.0001955
5.42667	0.000598		5.42667	-1.1e-05		5.42667	0.0001895
5.43	0.0005995		5.43	-2.5e-06		5.43	0.0001825
5.43333	0.0006075		5.43333	8e-06		5.43333	0.0001925
5.43667	0.000616		5.43667	1.65e-05		5.43667	0.000207
5.44	0.000609		5.44	9e-06		5.44	0.00021
5.44333	0.000596		5.44333	1.05e-05		5.44333	0.00021
5.44667	0.0005935		5.44667	1.3e-05		5.44667	0.0002105
5.45	0.0005975		5.45	-2e-06		5.45	0.0002015
5.45333	0.0005935		5.45333	-1.1e-05		5.45333	0.00019
5.45667	0.0005935		5.45667	-1.05e-05		5.45667	0.0002015
5.46	0.0005935		5.46	-1.5e-05		5.46	0.0002065
5.46333	0.000599		5.46333	-1.05e-05		5.46333	0.0001955
5.46667	0.0006		5.46667	-2e-06		5.46667	0.0001945
5.47	0.000602		5.47	-3e-06		5.47	0.000192
5.47333	0.0006		5.47333	-5e-06		5.47333	0.00019
5.47667	0.0005975		5.47667	-3.5e-06		5.47667	0.000191
5.48	0.0005995		5.48	8e-06		5.48	0.0001855
5.48333	0.0006015		5.48333	9.5e-06		5.48333	0.000195
5.48667	0.0006075		5.48667	-4e-06		5.48667	0.0002035
5.49	0.0006075		5.49	-1.05e-05		5.49	0.0001965
5.49333	0.0006135		5.49333	-7e-06		5.49333	0.0001905
5.49667	0.000616		5.49667	-1e-06		5.49667	0.000192
5.5	0.0006155		5.5	5e-06		5.5	0.000193
5.50333	0.000621		5.50333	6.5e-06		5.50333	0.0001945
5.50667	0.000618		5.50667	4.5e-06		5.50667	0.0001995
5.51	0.000623		5.51	-4e-06		5.51	0.000201
5.51333	0.0006275		5.51333	-4e-06		5.51333	0.0001995
5.51667	0.000621		5.51667	4.5e-06		5.51667	0.0001995
5.52	0.0006205		5.52	2.5e-06		5.52	0.0002035
5.52333	0.000621		5.52333	-6e-06		5.52333	0.0001995
5.52667	0.000626		5.52667	-1.3e-05		5.52667	0.0001985
5.53	0.0006355		5.53	-2e-06		5.53	0.000198
5.53333	0.000639		5.53333	1.5e-06		5.53333	0.000192
5.53667	0.000635		5.53667	4.5e-06		5.53667	0.0002025
5.54	0.000628		5.54	2e-06		5.54	0.0002095
5.54333	0.00062		5.54333	-5e-06		5.54333	0.0002075
5.54667	0.000616		5.54667	2.5e-06		5.54667	0.0002055
5.55	0.000618		5.55	9.5e-06		5.55	0.0001965
5.55333	0.000625		5.55333	7.5e-06		5.55333	0.000199
5.55667	0.0006235		5.55667	-2.5e-06		5.55667	0.000208
5.56	0.000617		5.56	-9.5e-06		5.56	0.0002065
5.56333	0.0006165		5.56333	-5e-06		5.56333	0.0002015
5.56667	0.0006225		5.56667	1.05e-05		5.56667	0.000203
5.57	0.000619		5.57	0		5.57	0.000203
5.57333	0.0006185		5.57333	-3.5e-06		5.57333	0.000204
5.57667	0.00063		5.57667	1.15e-05		5.57667	0.0002125
5.58	0.000638		5.58	6.5e-06		5.58	0.0002125
5.58333	0.0006315		5.58333	-5.5e-06		5.58333	0.000207
5.58667	0.0006215		5.58667	-8e-06		5.58667	0.000207
5.59	0.000626		5.59	-7.5e-06		5.59	0.0002045
5.59333	0.0006245		5.59333	-1.4e-05		5.59333	0.000196
5.59667	0.0006235		5.59667	-1.15e-05		5.59667	0.000198
5.6	0.0006375		5.6	4e-06		5.6	0.0002075
5.60333	0.00064		5.60333	6.5e-06		5.60333	0.000203
5.60667	0.000631		5.60667	-5e-07		5.60667	0.000201
5.61	0.0006365		5.61	1.35e-05		5.61	0.0002085
5.61333	0.000649		5.61333	3e-05		5.61333	0.0002045
5.61667	0.0006435		5.61667	2.2e-05		5.61667	0.0001965
5.62	0.0006495		5.62	1.15e-05		5.62	0.0002075
5.62333	0.0006635		5.62333	7e-06		5.62333	0.000214
5.62667	0.000659		5.62667	2e-06		5.62667	0.0002065
5.63	0.000658		5.63	-3e-06		5.63	0.0002
5.63333	0.000664		5.63333	-6.5e-06		5.63333	0.0002085
5.63667	0.000672		5.63667	-3.5e-06		5.63667	0.0002215
5.64	0.00067		5.64	6e-06		5.64	0.0002135
5.64333	0.000669		5.64333	1.6e-05		5.64333	0.0002015
5.64667	0.0006835		5.64667	1.15e-05		5.64667	0.000205
5.65	0.0006835		5.65	-5e-07		5.65	0.000206
5.65333	0.0006755		5.65333	-2e-06		5.65333	0.0002065
5.65667	0.000678		5.65667	-3e-06		5.65667	0.0002105
5.66	0.000681		5.66	-6e-06		5.66	0.0002055
5.66333	0.0006865		5.66333	-8e-06		5.66333	0.000208
5.66667	0.000692		5.66667	-1.5e-05		5.66667	0.0002105
5.67	0.000693		5.67	-6.5e-06		5.67	0.000206
5.67333	0.000701		5.67333	4e-06		5.67333	0.0002035
5.67667	0.0007095		5.67667	7.5e-06		5.67667	0.0001955
5.68	0.000711		5.68	6.5e-06		5.68	0.0001985
5.68333	0.0007		5.68333	-1.5e-06		5.68333	0.0002035
5.68667	0.0007015		5.68667	0		5.68667	0.000192
5.69	0.000706		5.69	1.55e-05		5.69	0.000187
5.69333	0.0006985		5.69333	1.95e-05		5.69333	0.0001965
5.69667	0.000702		5.69667	5.5e-06		5.69667	0.0002035
5.7	0.0007105		5.7	-2.5e-06		5.7	0.0002015
5.70333	0.0007195		5.70333	0		5.70333	0.0001985
5.70667	0.0007165		5.70667	6e-06		5.70667	0.000191
5.71	0.0007085		5.71	7e-06		5.71	0.000194
5.71333	0.000706		5.71333	2.5e-06		5.71333	0.0002015
5.71667	0.000705		5.71667	-2.5e-06		5.71667	0.000189
5.72	0.0007135		5.72	1.5e-06		5.72	0.000194
5.72333	0.000707		5.72333	6.5e-06		5.72333	0.000203
5.72667	0.0006865		5.72667	1.9e-05		5.72667	0.0002015
5.73	0.000681		5.73	1.15e-05		5.73	0.0002
5.73333	0.0006855		5.73333	-9e-06		5.73333	0.0002015
5.73667	0.000687		5.73667	-4.5e-06		5.73667	0.0002125
5.74	0.000671		5.74	-1e-06		5.74	0.0002095
5.74333	0.000665		5.74333	-8.5e-06		5.74333	0.0001945
5.74667	0.000662		5.74667	-1.15e-05		5.74667	0.000196
5.75	0.0006475		5.75	-2.5e-06		5.75	0.000202
5.75333	0.000646		5.75333	8e-06		5.75333	0.0001965
5.75667	0.0006435		5.75667	1.35e-05		5.75667	0.0001925
5.76	0.000625		5.76	1.1e-05		5.76	0.0001955
5.76333	0.000624		5.76333	5e-06		5.76333	0.000198
5.76667	0.000624		5.76667	5.5e-06		5.76667	0.000196
5.77	0.000614		5.77	4e-06		5.77	0.0001995
5.77333	0.000617		5.77333	9.5e-06		5.77333	0.000198
5.77667	0.000617		5.77667	1.5e-05		5.77667	0.0001935
5.78	0.00062		5.78	7.5e-06		5.78	0.0001925
5.78333	0.000617		5.78333	1.15e-05		5.78333	0.000189
5.78667	0.0006075		5.78667	1.2e-05		5.78667	0.00019
5.79	0.000601		5.79	7.5e-06		5.79	0.0001895
5.79333	0.000601		5.79333	9e-06		5.79333	0.0001845
5.79667	0.000595		5.79667	3e-06		5.79667	0.0001945
5.8	0.0005855		5.8	-2e-06		5.8	0.0001925
5.80333	0.0005845		5.80333	5e-07		5.80333	0.0001875
5.80667	0.000583		5.80667	1.45e-05		5.80667	0.0001985
5.81	0.000574		5.81	2.1e-05		5.81	0.000188
5.81333	0.00058		5.81333	2.05e-05		5.81333	0.0001815
5.81667	0.0005945		5.81667	1.2e-05		5.81667	0.0001845
5.82	0.000595		5.82	6.5e-06		5.82	0.000181
5.82333	0.0005985		5.82333	1e-05		5.82333	0.000192
5.82667	0.000591		5.82667	6e-06		5.82667	0.000204
5.83	0.0005815		5.83	5e-06		5.83	0.0002055
5.83333	0.000589		5.83333	7e-06		5.83333	0.00021
5.83667	0.0005895		5.83667	4.5e-06		5.83667	0.0002015
5.84	0.000587		5.84	-1e-06		5.84	0.0001855
5.84333	0.0005915		5.84333	4.5e-06		5.84333	0.000186
5.84667	0.000594		5.84667	1.05e-05		5.84667	0.000189
5.85	0.000603		5.85	5e-06		5.85	0.000186
5.85333	0.000617		5.85333	-4e-06		5.85333	0.000182
5.85667	0.000625		5.85667	-9.5e-06		5.85667	0.0001885
5.86	0.0006155		5.86	0		5.86	0.000194
5.86333	0.0006065		5.86333	5e-06		5.86333	0.000201
5.86667	0.0006175		5.86667	6.5e-06		5.86667	0.0002025
5.87	0.000627		5.87	4e-06		5.87	0.000192
5.87333	0.00063		5.87333	-5e-07		5.87333	0.000194
5.87667	0.000638		5.87667	2.5e-06		5.87667	0.0001995
5.88	0.000641		5.88	7.5e-06		5.88	0.000198
5.88333	0.0006495		5.88333	3e-06		5.88333	0.000197
5.88667	0.0006595		5.88667	-6e-06		5.88667	0.000188
5.89	0.000652		5.89	6.5e-06		5.89	0.0001875
5.89333	0.000642		5.89333	1.05e-05		5.89333	0.000198
5.89667	0.000649		5.89667	1.2e-05		5.89667	0.0002015
5.9	0.000653		5.9	8.5e-06		5.9	0.000202
5.90333	0.000652		5.90333	-7e-06		5.90333	0.000195
5.90667	0.0006615		5.90667	-9e-06		5.90667	0.0001955
5.91	0.0006765		5.91	5e-07		5.91	0.0002045
5.91333	0.00069		5.91333	5e-06		5.91333	0.0001955
5.91667	0.000688		5.91667	-3.5e-06		5.91667	0.0001895
5.92	0.000686		5.92	-5e-06		5.92	0.000187
5.92333	0.000692		5.92333	4e-06		5.92333	0.000181
5.92667	0.000694		5.92667	1.65e-05		5.92667	0.000193
5.93	0.0006965		5.93	1.25e-05		5.93	0.000205
5.93333	0.0006985		5.93333	1e-06		5.93333	0.000199
5.93667	0.000693		5.93667	4.5e-06		5.93667	0.0001915
5.94	0.0006845		5.94	4e-06		5.94	0.0001905
5.94333	0.000683		5.94333	-1e-06		5.94333	0.0001925
5.94667	0.00069		5.94667	-5.5e-06		5.94667	0.000192
5.95	0.0006965		5.95	-1.1e-05		5.95	0.000191
5.95333	0.0007085		5.95333	-2e-06		5.95333	0.00019
5.95667	0.0007025		5.95667	7.5e-06		5.95667	0.000181
5.96	0.00069		5.96	8.5e-06		5.96	0.000187
5.96333	0.0006925		5.96333	-5e-07		5.96333	0.000197
5.96667	0.0006875		5.96667	-1e-06		5.96667	0.000198
5.97	0.0006835		5.97	1.5e-05		5.97	0.0002
5.97333	0.000681		5.97333	1.3e-05		5.97333	0.000191
5.97667	0.000672		5.97667	1e-05		5.97667	0.000193
5.98	0.000665		5.98	6e-06		5.98	0.0002075
5.98333	0.0006645		5.98333	-1e-06		5.98333	0.0002135
5.98667	0.0006605		5.98667	-2.5e-06		5.98667	0.0002125
5.99	0.000654		5.99	-2e-06		5.99	0.0001965
5.99333	0.0006445		5.99333	-5e-07		5.99333	0.0001965
5.99667	0.0006375		5.99667	-1.5e-06		5.99667	0.000205
6	0.000632		6	0		6	0.0001945
6.00333	0.0006275		6.00333	5e-07		6.00333	0.0001925
6.00667	0.0006305		6.00667	3.5e-06		6.00667	0.000199
6.01	0.0006265		6.01	5.5e-06		6.01	0.0002025
6.01333	0.0006165		6.01333	1.35e-05		6.01333	0.000203
6.01667	0.000613		6.01667	9.5e-06		6.01667	0.0001925
6.02	0.0006		6.02	3.5e-06		6.02	0.000189
6.02333	0.0005905		6.02333	1.15e-05		6.02333	0.0001935
6.02667	0.0005935		6.02667	1.3e-05		6.02667	0.0001975
6.03	0.000585		6.03	1.3e-05		6.03	0.0002045
6.03333	0.0005755		6.03333	6.5e-06		6.03333	0.0002085
6.03667	0.0005735		6.03667	4e-06		6.03667	0.0002055
6.04	0.0005755		6.04	4.5e-06		6.04	0.0002005
6.04333	0.000586		6.04333	8.5e-06		6.04333	0.000197
6.04667	0.000585		6.04667	1.15e-05		6.04667	0.0001965
6.05	0.0005745		6.05	8e-06		6.05	0.0001985
6.05333	0.0005615		6.05333	5e-06		6.05333	0.000192
6.05667	0.0005495		6.05667	4e-06		6.05667	0.000188
6.06	0.000551		6.06	5e-07		6.06	0.000201
6.06333	0.0005565		6.06333	2e-06		6.06333	0.000203
6.06667	0.0005465		6.06667	1.25e-05		6.06667	0.000199
6.07	0.0005355		6.07	5.5e-06		6.07	0.000191
6.07333	0.0005405		6.07333	-2.5e-06		6.07333	0.0001825
6.07667	0.000538		6.07667	1.5e-05		6.07667	0.000182
6.08	0.0005295		6.08	2.05e-05		6.08	0.000179
6.08333	0.000527		6.08333	1.05e-05		6.08333	0.0001795
6.08667	0.000531		6.08667	5e-06		6.08667	0.0001755
6.09	0.0005315		6.09	7.5e-06		6.09	0.0001725
6.09333	0.000532		6.09333	1.05e-05		6.09333	0.000173
6.09667	0.0005305		6.09667	7.5e-06		6.09667	0.0001805
6.1	0.0005225		6.1	1.55e-05		6.1	0.0001865
6.10333	0.000521		6.10333	2.85e-05		6.10333	0.00018
6.10667	0.0005165		6.10667	2.65e-05		6.10667	0.0001735
6.11	0.000514		6.11	2e-05		6.11	0.0001755
6.11333	0.0005065		6.11333	2.55e-05		6.11333	0.0001915
6.11667	0.000499		6.11667	2.1e-05		6.11667	0.0001975
6.12	0.000505		6.12	1.35e-05		6.12	0.000184
6.12333	0.0005055		6.12333	7.5e-06		6.12333	0.0001775
6.12667	0.000497		6.12667	2e-06		6.12667	0.0001805
6.13	0.000495		6.13	4e-06		6.13	0.0001925
6.13333	0.0005065		6.13333	9.5e-06		6.13333	0.0001905
6.13667	0.0005015		6.13667	1.1e-05		6.13667	0.0001795
6.14	0.00049		6.14	5.5e-06		6.14	0.0001835
6.14333	0.000489		6.14333	1.1e-05		6.14333	0.0001845
6.14667	0.0004705		6.14667	1.65e-05		6.14667	0.0001795
6.15	0.000467		6.15	7e-06		6.15	0.0001775
6.15333	0.000481		6.15333	1.3e-05		6.15333	0.0001795
6.15667	0.000486		6.15667	1.8e-05		6.15667	0.000177
6.16	0.0004885		6.16	3.5e-06		6.16	0.000183
6.16333	0.0004885		6.16333	-9e-06		6.16333	0.000182
6.16667	0.0004775		6.16667	-7e-06		6.16667	0.000181
6.17	0.0004675		6.17	3.5e-06		6.17	0.000193
6.17333	0.000473		6.17333	1.05e-05		6.17333	0.0001885
6.17667	0.0004755		6.17667	1.5e-05		6.17667	0.0001795
6.18	0.0004825		6.18	1.3e-05		6.18	0.0001775
6.18333	0.0004805		6.18333	1.45e-05		6.18333	0.0001775
6.18667	0.000468		6.18667	1e-05		6.18667	0.0001805
6.19	0.000469		6.19	-1.5e-06		6.19	0.000177
6.19333	0.0004715		6.19333	-3e-06		6.19333	0.000181
6.19667	0.000466		6.19667	9e-06		6.19667	0.0001865
6.2	0.000457		6.2	2.4e-05		6.2	0.000182
6.20333	0.000457		6.20333	2.85e-05		6.20333	0.0001885
6.20667	0.0004575		6.20667	1.2e-05		6.20667	0.0001875
6.21	0.00045		6.21	7e-06		6.21	0.000181
6.21333	0.0004545		6.21333	1.65e-05		6.21333	0.000184
6.21667	0.0004555		6.21667	2.15e-05		6.21667	0.0001925
6.22	0.000447		6.22	1.95e-05		6.22	0.000187
6.22333	0.0004475		6.22333	8e-06		6.22333	0.0001805
6.22667	0.000438		6.22667	1.5e-06		6.22667	0.000185
6.23	0.0004415		6.23	5e-07		6.23	0.0001845
6.23333	0.0004505		6.23333	5.5e-06		6.23333	0.000191
6.23667	0.000439		6.23667	1.4e-05		6.23667	0.0001945
6.24	0.0004385		6.24	1.35e-05		6.24	0.00019
6.24333	0.0004355		6.24333	1.95e-05		6.24333	0.0001935
6.24667	0.000431		6.24667	2.9e-05		6.24667	0.0002005
6.25	0.0004405		6.25	3.05e-05		6.25	0.0001875
6.25333	0.0004425		6.25333	3.95e-05		6.25333	0.000188
6.25667	0.0004425		6.25667	4.5e-05		6.25667	0.0002045
6.26	0.0004485		6.26	4.05e-05		6.26	0.0002145
6.26333	0.000448		6.26333	4.2e-05		6.26333	0.0002035
6.26667	0.0004395		6.26667	5.3e-05		6.26667	0.0001895
6.27	0.0004495		6.27	6.45e-05		6.27	0.000193
6.27333	0.000463		6.27333	6.2e-05		6.27333	0.0001995
6.27667	0.000464		6.27667	5.25e-05		6.27667	0.000205
6.28	0.000465		6.28	5.75e-05		6.28	0.000208
6.28333	0.0004695		6.28333	6.85e-05		6.28333	0.0002055
6.28667	0.0004745		6.28667	7e-05		6.28667	0.0002
6.29	0.000466		6.29	7.05e-05		6.29	0.0002
6.29333	0.0004515		6.29333	7.95e-05		6.29333	0.000199
6.29667	0.0004635		6.29667	8.7e-05		6.29667	0.0002065
6.3	0.0004835		6.3	9.4e-05		6.3	0.000213
6.30333	0.00048		6.30333	0.00011		6.30333	0.000218
6.30667	0.00047		6.30667	0.000124		6.30667	0.000232
6.31	0.000473		6.31	0.0001295		6.31	0.000238
6.31333	0.0004835		6.31333	0.000131		6.31333	0.000236
6.31667	0.000494		6.31667	0.000137		6.31667	0.000236
6.32	0.000495		6.32	0.000136		6.32	0.0002305
6.32333	0.0004935		6.32333	0.00014		6.32333	0.0002285
6.32667	0.000499		6.32667	0.000153		6.32667	0.0002325
6.33	0.0005045		6.33	0.0001625		6.33	0.000247
6.33333	0.000518		6.33333	0.0001635		6.33333	0.0002575
6.33667	0.000527		6.33667	0.0001515		6.33667	0.0002445
6.34	0.000525		6.34	0.000148		6.34	0.000246
6.34333	0.000511		6.34333	0.000142		6.34333	0.000255
6.34667	0.00051		6.34667	0.0001545		6.34667	0.0002565
6.35	0.0005205		6.35	0.000187		6.35	0.0002625
6.35333	0.0005175		6.35333	0.0001935		6.35333	0.000263
6.35667	0.0005195		6.35667	0.000167		6.35667	0.000261
6.36	0.000513		6.36	0.000168		6.36	0.000264
6.36333	0.000513		6.36333	0.0001905		6.36333	0.0002665
6.36667	0.00052		6.36667	0.0002		6.36667	0.000271
6.37	0.0005105		6.37	0.0001935		6.37	0.0002745
6.37333	0.0005115		6.37333	0.0001805		6.37333	0.000276
6.37667	0.00051		6.37667	0.0001735		6.37667	0.000278
6.38	0.0005		6.38	0.0001665		6.38	0.000271
6.38333	0.0004985		6.38333	0.0001735		6.38333	0.0002665
6.38667	0.000486		6.38667	0.000168		6.38667	0.000262
6.39	0.0004825		6.39	0.0001575		6.39	0.0002515
6.39333	0.0004985		6.39333	0.0001775		6.39333	0.0002525
6.39667	0.000494		6.39667	0.0001825		6.39667	0.000263
6.4	0.0004715		6.4	0.000168		6.4	0.0002615
6.40333	0.000473		6.40333	0.000164		6.40333	0.0002535
6.40667	0.0004855		6.40667	0.0001515		6.40667	0.000255
6.41	0.0004915		6.41	0.0001445		6.41	0.000244
6.41333	0.00048		6.41333	0.0001495		6.41333	0.000238
6.41667	0.000467		6.41667	0.000147		6.41667	0.0002385
6.42	0.000473		6.42	0.000135		6.42	0.0002335
6.42333	0.000474		6.42333	0.0001225		6.42333	0.000233
6.42667	0.000459		6.42667	0.0001135		6.42667	0.000231
6.43	0.000445		6.43	0.0001085		6.43	0.000232
6.43333	0.000441		6.43333	0.000112		6.43333	0.000231
6.43667	0.0004365		6.43667	0.0001075		6.43667	0.0002255
6.44	0.000429		6.44	0.000111		6.44	0.000221
6.44333	0.0004185		6.44333	0.0001105		6.44333	0.000224
6.44667	0.000426		6.44667	9.4e-05		6.44667	0.0002215
6.45	0.000439		6.45	8.45e-05		6.45	0.000212
6.45333	0.000427		6.45333	8.15e-05		6.45333	0.0002085
6.45667	0.00042		6.45667	8.8e-05		6.45667	0.0002035
6.46	0.000436		6.46	8.65e-05		6.46	0.0002
6.46333	0.0004285		6.46333	8.2e-05		6.46333	0.0002
6.46667	0.0004175		6.46667	8.15e-05		6.46667	0.0001925
6.47	0.000422		6.47	7.65e-05		6.47	0.000186
6.47333	0.000422		6.47333	7.05e-05		6.47333	0.0001855
6.47667	0.00042		6.47667	6.4e-05		6.47667	0.0001905
6.48	0.00042		6.48	6.3e-05		6.48	0.0001875
6.48333	0.000421		6.48333	5.8e-05		6.48333	0.0001715
6.48667	0.000411		6.48667	6.1e-05		6.48667	0.0001785
6.49	0.000397		6.49	6.05e-05		6.49	0.00019
6.49333	0.0004015		6.49333	5.55e-05		6.49333	0.000187
6.49667	0.0004185		6.49667	6.25e-05		6.49667	0.00018
6.5	0.000418		6.5	5.75e-05		6.5	0.000169
6.50333	0.0004075		6.50333	5.2e-05		6.50333	0.000163
6.50667	0.0004045		6.50667	5.55e-05		6.50667	0.000167
6.51	0.000415		6.51	4.6e-05		6.51	0.0001695
6.51333	0.00041		6.51333	3.2e-05		6.51333	0.0001755
6.51667	0.0003955		6.51667	3.35e-05		6.51667	0.000181
6.52	0.0003915		6.52	4.35e-05		6.52	0.0001825
6.52333	0.000388		6.52333	4.55e-05		6.52333	0.0001795
6.52667	0.0003925		6.52667	3.5e-05		6.52667	0.000175
6.53	0.0003895		6.53	2.65e-05		6.53	0.000181
6.53333	0.000381		6.53333	2.6e-05		6.53333	0.0001755
6.53667	0.0003935		6.53667	2.5e-05		6.53667	0.000174
6.54	0.000399		6.54	2.75e-05		6.54	0.000182
6.54333	0.000384		6.54333	3.05e-05		6.54333	0.000181
6.54667	0.000376		6.54667	1.95e-05		6.54667	0.0001745
6.55	0.000382		6.55	1.7e-05		6.55	0.000178
6.55333	0.0003925		6.55333	2.65e-05		6.55333	0.000181
6.55667	0.0003895		6.55667	3.3e-05		6.55667	0.0001735
6.56	0.0003735		6.56	3.55e-05		6.56	0.0001805
6.56333	0.0003695		6.56333	3.6e-05		6.56333	0.0001755
6.56667	0.000376		6.56667	3.35e-05		6.56667	0.000168
6.57	0.0003755		6.57	2.9e-05		6.57	0.0001745
6.57333	0.0003715		6.57333	2.05e-05		6.57333	0.00016
6.57667	0.000371		6.57667	1.9e-05		6.57667	0.0001545
6.58	0.0003665		6.58	2.15e-05		6.58	0.00016
6.58333	0.0003615		6.58333	1.45e-05		6.58333	0.0001585
6.58667	0.0003625		6.58667	1.65e-05		6.58667	0.000166
6.59	0.000367		6.59	2.6e-05		6.59	0.0001615
6.59333	0.000365		6.59333	2.95e-05		6.59333	0.0001535
6.59667	0.0003665		6.59667	3.05e-05		6.59667	0.0001625
6.6	0.0003645		6.6	2.95e-05		6.6	0.0001715
6.60333	0.000356		6.60333	2.85e-05		6.60333	0.0001655
6.60667	0.000359		6.60667	3.25e-05		6.60667	0.000159
6.61	0.000366		6.61	2.1e-05		6.61	0.000165
6.61333	0.0003705		6.61333	7e-06		6.61333	0.0001665
6.61667	0.000362		6.61667	9.5e-06		6.61667	0.0001725
6.62	0.000355		6.62	1.35e-05		6.62	0.000163
6.62333	0.0003645		6.62333	1.8e-05		6.62333	0.000149
6.62667	0.0003685		6.62667	2.2e-05		6.62667	0.000162
6.63	0.0003535		6.63	2e-05		6.63	0.000169
6.63333	0.000344		6.63333	1.7e-05		6.63333	0.0001705
6.63667	0.0003455		6.63667	1.75e-05		6.63667	0.000168
6.64	0.000344		6.64	1.55e-05		6.64	0.000163
6.64333	0.0003455		6.64333	1.65e-05		6.64333	0.0001635
6.64667	0.000357		6.64667	2.45e-05		6.64667	0.000163
6.65	0.000357		6.65	2.15e-05		6.65	0.0001485
6.65333	0.000347		6.65333	2.45e-05		6.65333	0.00014
6.65667	0.000342		6.65667	3.7e-05		6.65667	0.000157
6.66	0.000339		6.66	3.6e-05		6.66	0.000158
[truncated: 7,302 more rows]

## Sheet: Fig 19a
Time(h)	No RNA				Cap(-)				ARCA				DiPure				DiPure/3'Ome				DiPure/2'Ome
	#1	#2	#3	#4	#1	#2	#3	#4	#1	#2	#3	#4	#1	#2	#3	#4	#1	#2	#3	#4	#1	#2	#3	#4
0.5	1863	1702	1648	1756	4803	4254	4039	3436	46839	39504	45266	42121	114453	101044	123823	119730	98750	110016	121841	123123	117490	122013	136348	121626
1	1756	1777	1702	1691	5191	5062	4771	4480	133290	140064	121066	152223	324856	345179	392513	392427	371791	271921	389034	426589	421161	431662	405867	418425
2	2057	1799	1788	1702	6850	6031	5977	5762	286245	278598	243542	289476	691703	753954	705564	893899	884777	695559	797217	689991	866920	855580	885553	792554
4	1874	1712	1831	1788	7033	6914	6796	6688	374398	340601	326062	364263	906403	980619	950280	1139875	970506	850862	975471	1046823	1118874	1153467	1130667	1242987
6	2014	1960	1756	2132	7076	6494	6419	6656	308819	340321	312502	307537	923043	983312	810486	957765	835914	775655	1032283	867071	1000404	1030926	1267511	1174856

## Sheet: Fig 19b
Time(h)	No RNA			Cap(-)			Tri_1			TriPure_0			TriPure_1			TetraPure_2			TetraPure_2/m6A
	#1	#2	#3	#1	#2	#3	#1	#2	#3	#1	#2	#3	#1	#2	#3	#1	#2	#3	#1	#2	#3
0.5	1852	1669	1777	4631	3770	4286	47334	39235	40247	59838	58772	49757	54809	48454	54755	68422	58664	43026	75681	93311	67603
1	1917	1874	1928	6214	5223	5396	178922	99170	158017	212158	191598	209929	167215	206353	211404	261657	241819	314818	328087	400019	380461
2	1939	1971	1885	6731	6580	6344	378027	339675	349357	482636	458468	458877	427817	577875	443282	607643	599297	696205	810604	1005778	870884
4	2014	2111	2068	7776	7022	6904	457703	426750	449432	638456	614999	617703	551639	660944	593147	789958	716571	993769	1070549	1306423	1279261
6	2100	1885	2197	7410	7281	6807	430229	386277	407386	653093	580611	590982	522808	572975	513654	770938	690669	841676	1089461	1231948	1249245
